# Supplementary material for: α-Alkylidene δ-lactones inhibit quorum sensing phenotypes inChromobacteriumstrain CV026 showing interaction with the CviR receptor
Source: Royal Society of Chemistry journal article supplement (doi:10.1039/d3ra01975f), 2023-01-01

## Support Information

### $\alpha$ -alkylidene $\delta$ -lactones inhibit quorum sensing phenotypes in *Chromobacterium* strain CV026 showing interaction within the CviR receptor

Fernanda Favero<sup>1,2</sup>, Terezinha A. Tolentino<sup>1</sup>, Vinicius Fernandes<sup>3</sup>, Werner Treptow<sup>3æ</sup>, Alex L. Pereira<sup>2§</sup>, Angelo H.L. Machado<sup>1\*</sup>.

1: Instituto de Química, Universidade de Brasília, Campus Universitário Darcy Ribeiro, Asa Norte, Brasília, DF, 70910-900, Brazil

2: Campus of Ceilândia, University of Brasília, Centro Metropolitano, Conjunto A, Ceilândia Sul, Brasília, DF, 72220-275, Brazil

3: Laboratório de Biologia Teórica e Computacional, Departamento de Biologia Celular, Universidade de Brasília, Campus Universitário Darcy Ribeiro, Asa Norte, Brasília, DF, 70910-900, Brazil

Corresponding authors. \*Angelo H. L. Machado - E-mail: [nagelo@unb.br](mailto:nagelo@unb.br)

§ Alex L. Pereira - E-mail: [alexpereira@unb.br](mailto:alexpereira@unb.br)

æ Werner Treptow - E-mail: [treptow@unb.br](mailto:treptow@unb.br)

## Content:

### 1. Schemes and figures: Page 5–19

|                                                                                                                                                                                                                                                                  |
|------------------------------------------------------------------------------------------------------------------------------------------------------------------------------------------------------------------------------------------------------------------|
| <b>Schemes S1.</b> Synthesis of chlorolactone ( <b>20</b> ).                                                                                                                                                                                                     |
| <b>Scheme S2.</b> Violacein quantification assay.                                                                                                                                                                                                                |
| <b>Figure S1.</b> Violacein quantification assay for <b>10E</b> .                                                                                                                                                                                                |
| <b>Figure S2.</b> Violacein quantification assay for <b>10Z</b> .                                                                                                                                                                                                |
| <b>Figure S3.</b> Violacein quantification assay for <b>11E</b> .                                                                                                                                                                                                |
| <b>Figure S4.</b> Violacein quantification assay for <b>11Z</b> .                                                                                                                                                                                                |
| <b>Figure S5.</b> Violacein quantification assay for <b>12E</b> .                                                                                                                                                                                                |
| <b>Figure S6.</b> Violacein quantification assay for <b>12Z</b> .                                                                                                                                                                                                |
| <b>Figure S7.</b> Violacein quantification assay for <b>13E</b> .                                                                                                                                                                                                |
| <b>Figure S8.</b> Violacein quantification assay for <b>13Z</b> .                                                                                                                                                                                                |
| <b>Figure S9.</b> Violacein quantification assay for <b>14E</b> .                                                                                                                                                                                                |
| <b>Figure S10.</b> Violacein quantification assay for <b>15E</b> .                                                                                                                                                                                               |
| <b>Figure S11.</b> Violacein quantification assay for <b>16E</b> .                                                                                                                                                                                               |
| <b>Figure S12.</b> Violacein quantification assay for <b>17E</b> .                                                                                                                                                                                               |
| <b>Figure S13.</b> Violacein quantification assay for <b>18E</b> .                                                                                                                                                                                               |
| <b>Figure S14.</b> Violacein quantification assay for <b>19E</b> .                                                                                                                                                                                               |
| <b>Figure S15.</b> Violacein quantification assay for <b>20</b> .                                                                                                                                                                                                |
| <b>Figure S16.</b> Ligand binding domain for <b>2/CviR</b> .                                                                                                                                                                                                     |
| <b>Figure S17.</b> Ligand binding domain for <b>20/CviR</b> .                                                                                                                                                                                                    |
| <b>Figure S18.</b> Overlap of <b>2</b> with <b>10E</b> , and ligand binding domain for <b>10E/CviR</b> , respectively.                                                                                                                                           |
| <b>Figure S19.</b> Overlap of <b>2</b> with <b>10Z</b> , and ligand binding domain for <b>10Z/CviR</b> , respectively.                                                                                                                                           |
| <b>Figure S20.</b> Overlap of <b>2</b> with <b>11E</b> , and ligand binding domain for <b>11E/CviR</b> , respectively.                                                                                                                                           |
| <b>Figure S21.</b> Overlap of <b>2</b> with <b>11Z</b> , and ligand binding domain for <b>11Z/CviR</b> , respectively.                                                                                                                                           |
| <b>Figure S22.</b> Overlap of <b>2</b> with <b>12E</b> , and ligand binding domain for <b>12E/CviR</b> , respectively.                                                                                                                                           |
| <b>Figure S23.</b> Overlap of <b>2</b> with <b>12E</b> , and ligand binding domain for <b>12E/CviR</b> , respectively.                                                                                                                                           |
| <b>Figure S24.</b> Overlap of <b>2</b> with <b>13E</b> , and ligand binding domain for <b>13E/CviR</b> , respectively.                                                                                                                                           |
| <b>Figure S25.</b> Overlap of <b>2</b> with <b>13Z</b> , and ligand binding domain for <b>13E/CviR</b> , respectively.                                                                                                                                           |
| <b>Figure S26.</b> Overlap of <b>2</b> with <b>14E</b> , and ligand binding domain for <b>14E/CviR</b> , respectively.                                                                                                                                           |
| <b>Figure S27.</b> Overlap of <b>2</b> with <b>15E</b> , and ligand binding domain for <b>15E/CviR</b> , respectively.                                                                                                                                           |
| <b>Figure S28.</b> Overlap of <b>2</b> with <b>16E</b> , and ligand binding domain for <b>16E/CviR</b> , respectively.                                                                                                                                           |
| <b>Figure S29.</b> Overlap of <b>2</b> with <b>17E</b> , and ligand binding domain for <b>17E/CviR</b> , respectively.                                                                                                                                           |
| <b>Figure S30.</b> Overlap of <b>2</b> with <b>18E</b> , and ligand binding domain for <b>18E/CviR</b> , respectively.                                                                                                                                           |
| <b>Figure S31.</b> Overlap of <b>2</b> with <b>19E</b> , and ligand binding domain for <b>19E/CviR</b> , respectively.                                                                                                                                           |
| <b>Figure S32.</b> (A): Chemical structure of <b>21</b> .; B: CviR (PDB ID: 3PQ5) complex with <b>21</b> (blue), in yellow is shown HHL to exemplify the LBD.; (C): LBD complex with <b>21</b> (blue), in yellow is shown HHL ( <b>2</b> ) to exemplify the LBD. |

|                                                                                                               |                                                                                                                |
|---------------------------------------------------------------------------------------------------------------|----------------------------------------------------------------------------------------------------------------|
| <b>S2.1.</b> <sup>1</sup> H NMR spectrum of <b>8 (E/Z) R = Methyl</b> in CDCl <sub>3</sub> .                  | <b>S2.2.</b> <sup>13</sup> C NMR spectrum of <b>8 (E/Z) R = Methyl</b> in CDCl <sub>3</sub> .                  |
| <b>S2.3.</b> <sup>1</sup> H NMR spectrum of <b>8 (E/Z) R = Ethyl</b> in CDCl <sub>3</sub> .                   | <b>S2.4.</b> <sup>13</sup> C NMR spectrum of <b>8 (E/Z) R = Ethyl</b> in CDCl <sub>3</sub> .                   |
| <b>S2.5.</b> <sup>1</sup> H NMR spectrum of <b>8 (E/Z) R = n-Hexyl</b> in CDCl <sub>3</sub> .                 | <b>S2.6.</b> <sup>13</sup> C NMR spectrum of <b>8 (E/Z) R = n-Hexyl</b> in CDCl <sub>3</sub> .                 |
| <b>S2.7.</b> <sup>1</sup> H NMR spectrum of <b>8 (E/Z) R = n-Heptyl</b> in CDCl <sub>3</sub> .                | <b>S2.8.</b> <sup>13</sup> C NMR spectrum of <b>8 (E/Z) R = n-Heptyl</b> in CDCl <sub>3</sub> .                |
| <b>S2.9.</b> <sup>1</sup> H NMR spectrum of <b>8 (E/Z) R = iso-Propyl</b> in CDCl <sub>3</sub> .              | <b>S2.10.</b> <sup>13</sup> C NMR spectrum of <b>8 (E/Z) R = iso-Propyl</b> in CDCl <sub>3</sub> .             |
| <b>S2.11.</b> <sup>1</sup> H NMR spectrum of <b>8 (E) R = Phenyl</b> in CDCl <sub>3</sub> .                   | <b>S2.12.</b> <sup>13</sup> C NMR spectrum of <b>8 (E) R = Phenyl</b> in CDCl <sub>3</sub> .                   |
| <b>S2.13.</b> <sup>1</sup> H NMR spectrum of <b>8 (E) R = 4-Cl-Phenyl</b> in CDCl <sub>3</sub> .              | <b>S2.14.</b> <sup>13</sup> C NMR spectrum of <b>8 (E) R = 4-Cl-Phenyl</b> in CDCl <sub>3</sub> .              |
| <b>S2.15.</b> <sup>1</sup> H NMR spectrum of <b>8 (E) R = 4-Br-Phenyl</b> in CDCl <sub>3</sub> .              | <b>S2.16.</b> <sup>13</sup> C NMR spectrum of <b>8 (E) R = 4-Br-Phenyl</b> in CDCl <sub>3</sub> .              |
| <b>S2.17.</b> <sup>1</sup> H NMR spectrum of <b>8 (E) R = 3,4-methylenedioxyphenyl</b> in CDCl <sub>3</sub> . | <b>S2.18.</b> <sup>13</sup> C NMR spectrum of <b>8 (E) R = 3,4-methylenedioxyphenyl</b> in CDCl <sub>3</sub> . |
| <b>S2.19.</b> <sup>1</sup> H NMR spectrum of <b>8 (E) R = 4-NO<sub>2</sub>-Phenyl</b> in CDCl <sub>3</sub> .  | <b>S2.20.</b> <sup>13</sup> C NMR spectrum of <b>8 (E) R = 4-NO<sub>2</sub>-Phenyl</b> in CDCl <sub>3</sub> .  |
| <b>S2.21.</b> <sup>1</sup> H NMR spectrum of <b>10E</b> in CDCl <sub>3</sub> .                                | <b>S2.22.</b> <sup>13</sup> C NMR spectrum of <b>10E</b> in CDCl <sub>3</sub> .                                |
| <b>S2.23.</b> <sup>1</sup> H NMR spectrum of <b>10Z</b> in CDCl <sub>3</sub> .                                | <b>S2.24.</b> <sup>13</sup> C NMR spectrum of <b>10Z</b> in CDCl <sub>3</sub> .                                |
| <b>S2.25.</b> <sup>1</sup> H NMR spectrum of <b>11E</b> in CDCl <sub>3</sub> .                                | <b>S2.26.</b> <sup>13</sup> C NMR spectrum of <b>11E</b> in CDCl <sub>3</sub> .                                |
| <b>S2.27.</b> <sup>1</sup> H NMR spectrum of <b>11Z</b> in CDCl <sub>3</sub> .                                | <b>S2.28.</b> <sup>13</sup> C NMR spectrum of <b>11Z</b> in CDCl <sub>3</sub> .                                |
| <b>S2.29.</b> <sup>1</sup> H NMR spectrum of <b>12E</b> in CDCl <sub>3</sub> .                                | <b>S2.30.</b> <sup>13</sup> C NMR spectrum of <b>12E</b> in CDCl <sub>3</sub> .                                |
| <b>S2.31.</b> <sup>1</sup> H NMR spectrum of <b>12Z</b> in CDCl <sub>3</sub> .                                | <b>S2.32.</b> <sup>13</sup> C NMR spectrum of <b>12Z</b> in CDCl <sub>3</sub> .                                |
| <b>S2.33.</b> <sup>1</sup> H NMR spectrum of <b>13E</b> in CDCl <sub>3</sub> .                                | <b>S2.34.</b> <sup>13</sup> C NMR spectrum of <b>13E</b> in CDCl <sub>3</sub> .                                |
| <b>S2.35.</b> <sup>1</sup> H NMR spectrum of <b>13Z</b> in CDCl <sub>3</sub> .                                | <b>S2.36.</b> <sup>13</sup> C NMR spectrum of <b>13Z</b> in CDCl <sub>3</sub> .                                |
| <b>S2.37.</b> <sup>1</sup> H NMR spectrum of <b>14E</b> in CDCl <sub>3</sub> .                                | <b>S2.38.</b> <sup>13</sup> C NMR spectrum of <b>14E</b> in CDCl <sub>3</sub> .                                |
| <b>S2.39.</b> <sup>1</sup> H NMR spectrum of <b>15E</b> in CDCl <sub>3</sub> .                                | <b>S2.40.</b> <sup>13</sup> C NMR spectrum of <b>15E</b> in CDCl <sub>3</sub> .                                |
| <b>S2.41.</b> <sup>1</sup> H NMR spectrum of <b>16E</b> in CDCl <sub>3</sub> .                                | <b>S2.42.</b> <sup>13</sup> C NMR spectrum of <b>16E</b> in CDCl <sub>3</sub> .                                |
| <b>S2.43.</b> <sup>1</sup> H NMR spectrum of <b>17E</b> in CDCl <sub>3</sub> .                                | <b>S2.44.</b> <sup>13</sup> C NMR spectrum of <b>17E</b> in CDCl <sub>3</sub> .                                |
| <b>S2.45.</b> <sup>1</sup> H NMR spectrum of <b>18E</b> in CDCl <sub>3</sub> .                                | <b>S2.46.</b> <sup>13</sup> C NMR spectrum of <b>18E</b> in CDCl <sub>3</sub> .                                |
| <b>S2.47.</b> <sup>1</sup> H NMR spectrum of <b>19E</b> in CDCl <sub>3</sub> .                                | <b>S2.48.</b> <sup>13</sup> C NMR spectrum of <b>19E</b> in CDCl <sub>3</sub> .                                |
| <b>S2.49.</b> <sup>1</sup> H NMR spectrum of <b>20</b> in CDCl <sub>3</sub> .                                 | <b>S2.50.</b> <sup>13</sup> C NMR spectrum of <b>20</b> in CDCl <sub>3</sub> .                                 |

|                                                |                                                |
|------------------------------------------------|------------------------------------------------|
| <b>S3.1.</b> IR (ATR) spectrum of <b>10E</b> . | <b>S3.2.</b> IR (ATR) spectrum of <b>10Z</b> . |
| <b>S3.3.</b> IR (ATR) spectrum of <b>11E</b> . | <b>S3.4.</b> IR (ATR) spectrum of <b>11Z</b> . |
| <b>S3.5.</b> IR (ATR) spectrum of <b>12E</b> . | <b>S3.6.</b> IR (ATR) spectrum of <b>12Z</b> . |
| <b>S3.7.</b> IR (ATR) spectrum of <b>13E</b> . | <b>S3.8.</b> IR (ATR) spectrum of <b>13Z</b> . |

|                                                 |                                                 |
|-------------------------------------------------|-------------------------------------------------|
| <b>S3.9.</b> IR (ATR) spectrum of <b>14E</b> .  | <b>S3.10.</b> IR (ATR) spectrum of <b>15E</b> . |
| <b>S3.11.</b> IR (ATR) spectrum of <b>16E</b> . | <b>S3.12.</b> IR (ATR) spectrum of <b>17E</b> . |
| <b>S3.13.</b> IR (ATR) spectrum of <b>18E</b>   | <b>S3.14.</b> IR (ATR) spectrum of <b>19E</b> . |
| <b>S3.15.</b> IR (ATR) spectrum of <b>20</b> .  |                                                 |

**4. HRMS spectra of compounds 10 – 19.**

Page 78–91

|                                         |                                         |
|-----------------------------------------|-----------------------------------------|
| <b>S4.1.</b> HRMS data of <b>10E</b> .  | <b>S4.2.</b> HRMS data of <b>10Z</b> .  |
| <b>S4.3.</b> HRMS data of <b>11E</b> .  | <b>S4.4.</b> HRMS data of <b>11Z</b> .  |
| <b>S4.5.</b> HRMS data of <b>12E</b> .  | <b>S4.6.</b> HRMS data of <b>12Z</b> .  |
| <b>S4.7.</b> HRMS data of <b>13E</b> .  | <b>S4.8.</b> HRMS data of <b>13Z</b> .  |
| <b>S4.9.</b> HRMS data of <b>14E</b> .  | <b>S4.10.</b> HRMS data of <b>15E</b> . |
| <b>S4.11.</b> HRMS data of <b>16E</b> . | <b>S4.12.</b> HRMS data of <b>17E</b> . |
| <b>S4.13.</b> HRMS data of <b>18E</b>   | <b>S4.14.</b> HRMS data of <b>19E</b> . |

**5. Purity analyses of compounds 10-20 by GC-MS.**

Page 92-105

|                                          |                                          |
|------------------------------------------|------------------------------------------|
| <b>S5.1.</b> GC-MS data of <b>10E</b> .  | <b>S5.2.</b> GC-MS data of <b>10Z</b> .  |
| <b>S5.3.</b> GC-MS data of <b>11E</b> .  | <b>S5.4.</b> GC-MS data of <b>11Z</b> .  |
| <b>S5.5.</b> GC-MS data of <b>12E</b> .  | <b>S5.6.</b> GC-MS data of <b>12Z</b> .  |
| <b>S5.7.</b> GC-MS data of <b>13E</b> .  | <b>S5.8.</b> GC-MS data of <b>13Z</b> .  |
| <b>S5.9.</b> GC-MS data of <b>14E</b> .  | <b>S5.10.</b> GC-MS data of <b>15E</b> . |
| <b>S5.11.</b> GC-MS data of <b>16E</b> . | <b>S5.12.</b> GC-MS data of <b>17E</b> . |
| <b>S5.13.</b> GC-MS data of <b>18E</b>   | <b>S5.14.</b> GC-MS data of <b>19E</b> . |
| <b>S5.15.</b> GC-MS data of <b>20</b> .  |                                          |



**Scheme S1. Synthesis of chlorolactone (20)**

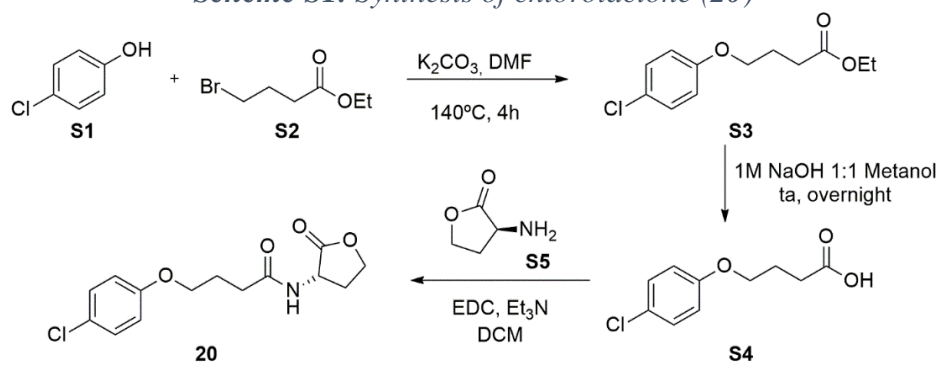

**Scheme S2. Violacein quantification assay.**

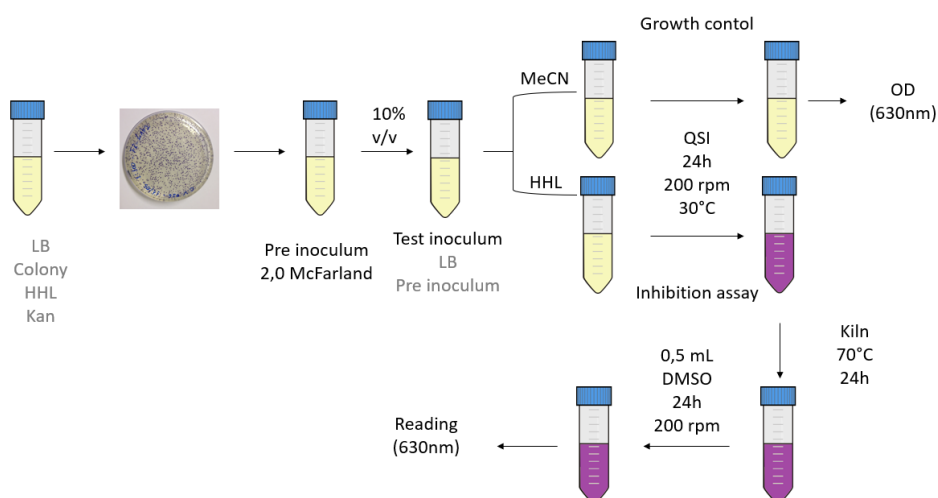

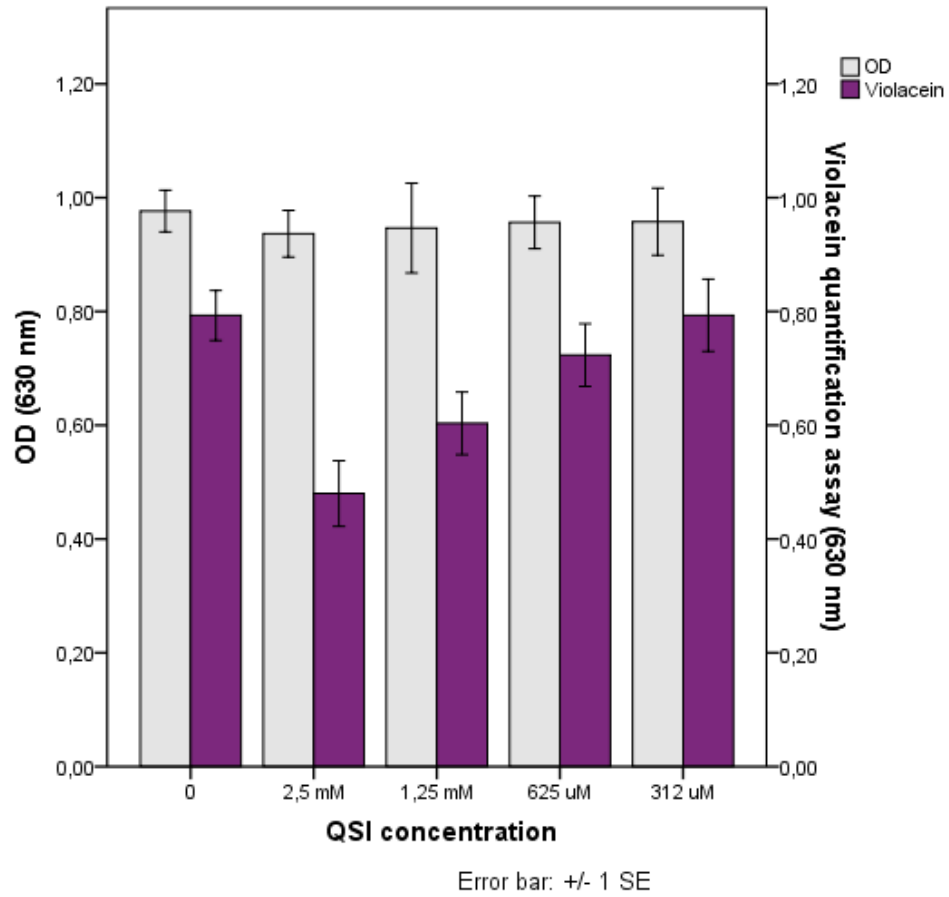

**Figure S1.** Violacein quantification assay for **10E**.

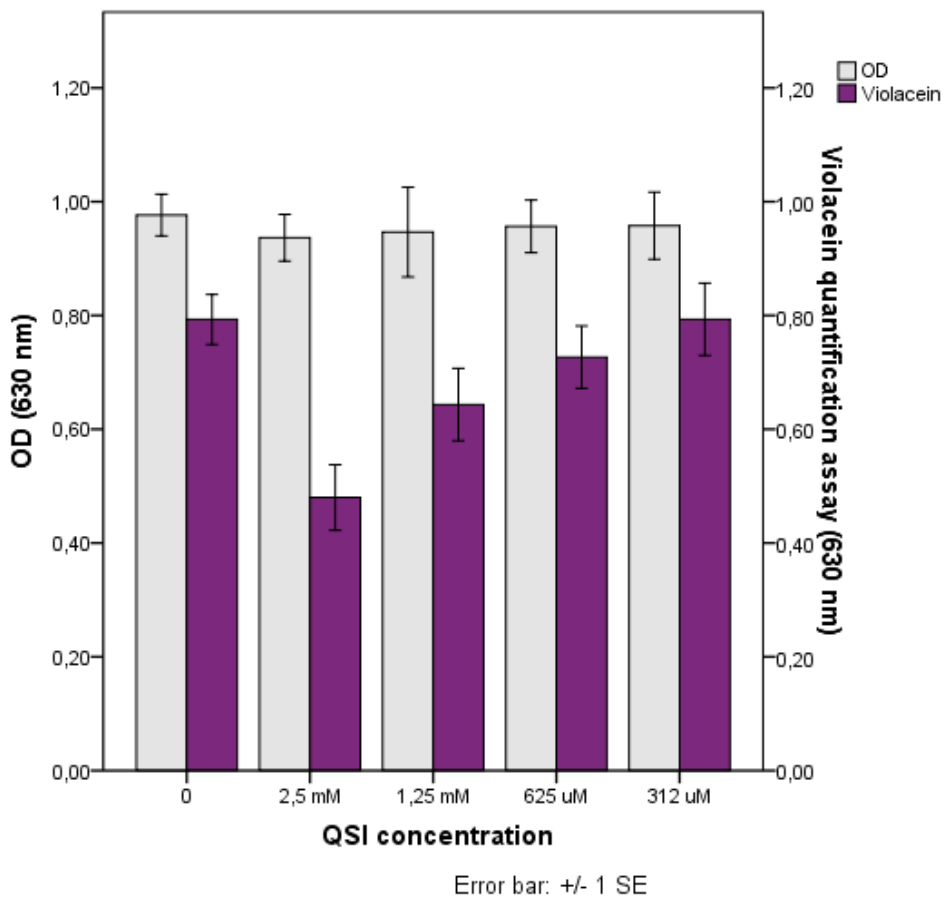

**Figure S2.** Violacein quantification assay for **10Z**.

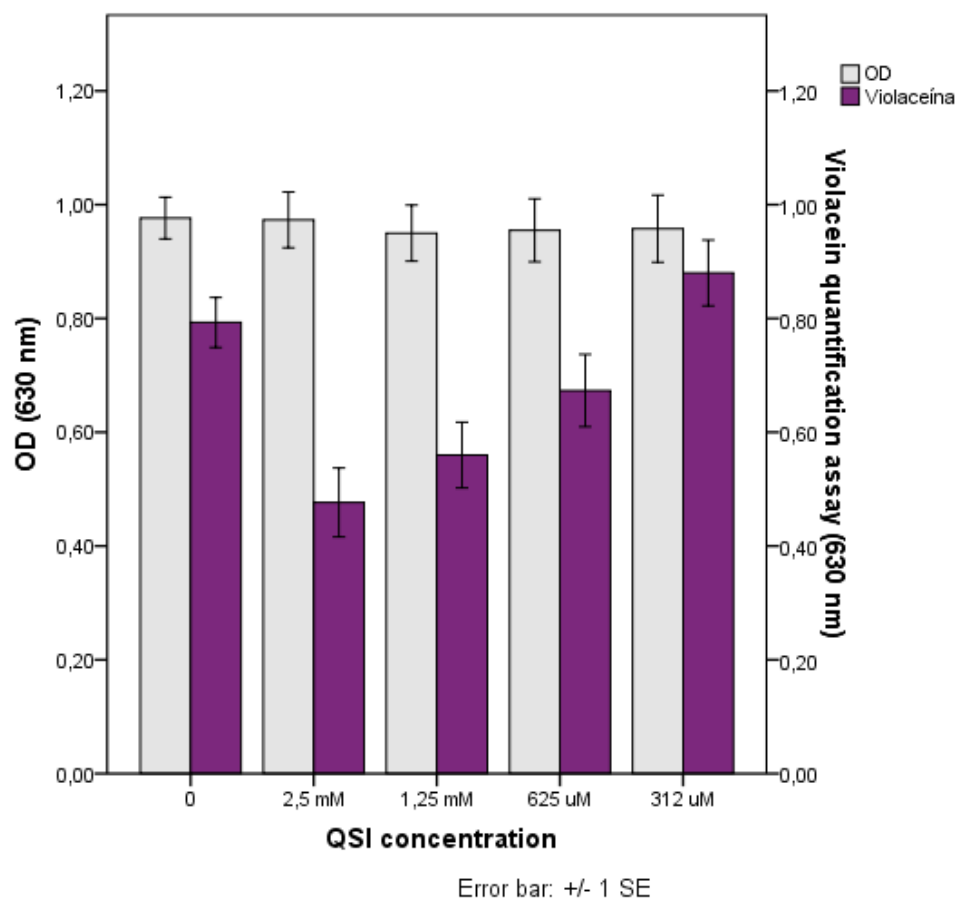

**Figure S3.** Violacein quantification assay for **11E**.

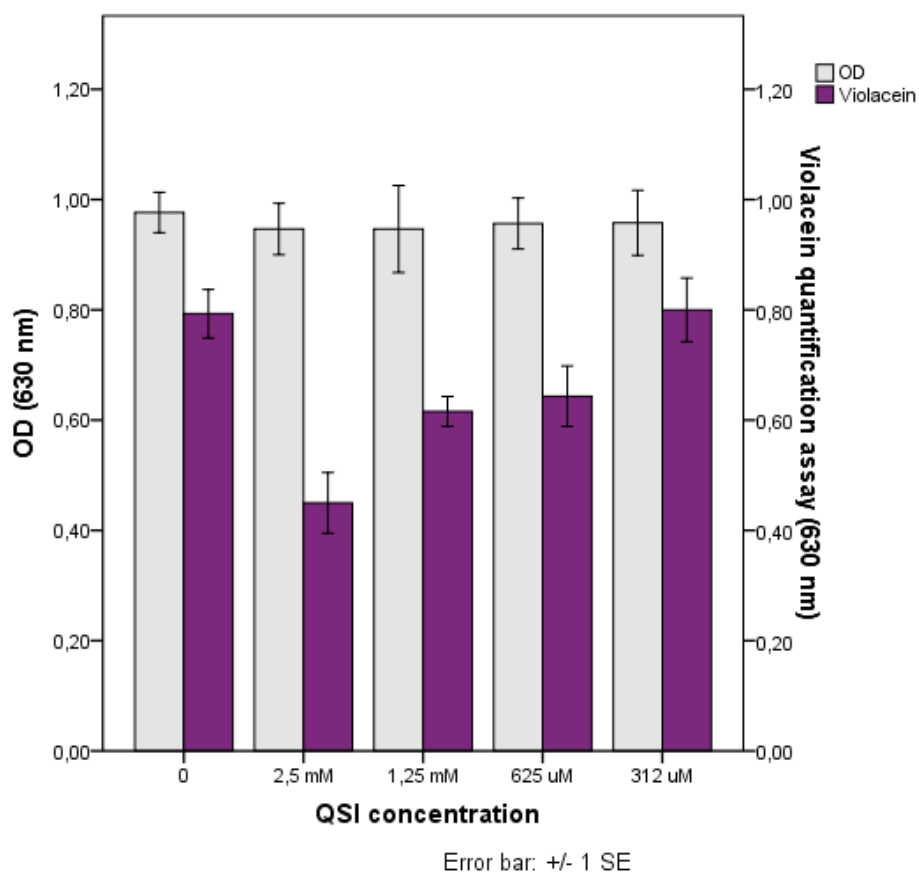

**Figure S4.** Violacein quantification assay for **11Z**.

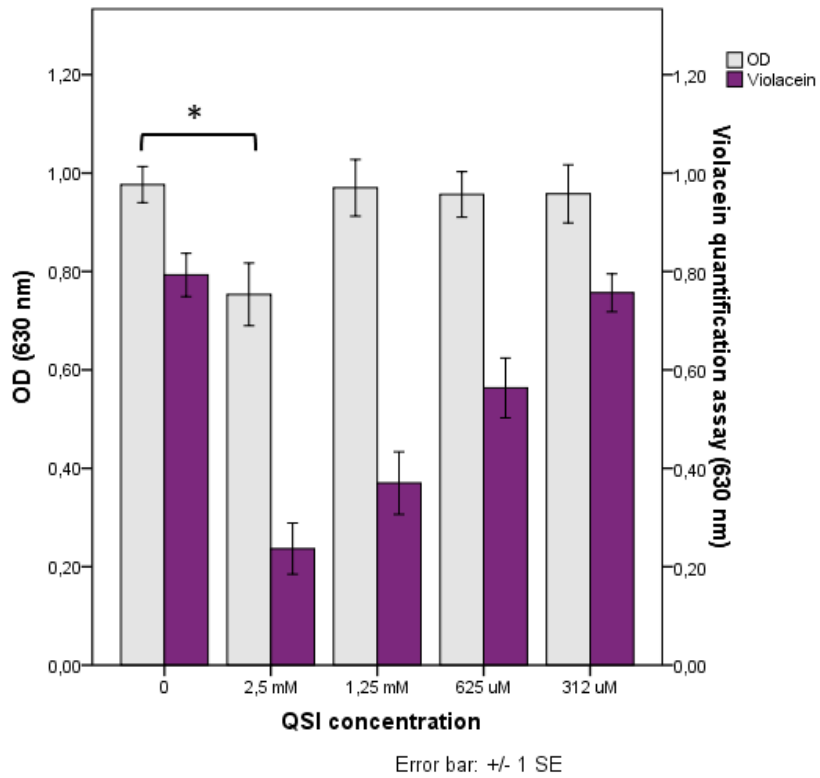

**Figure S5.** Violacein quantification assay for **12E**.

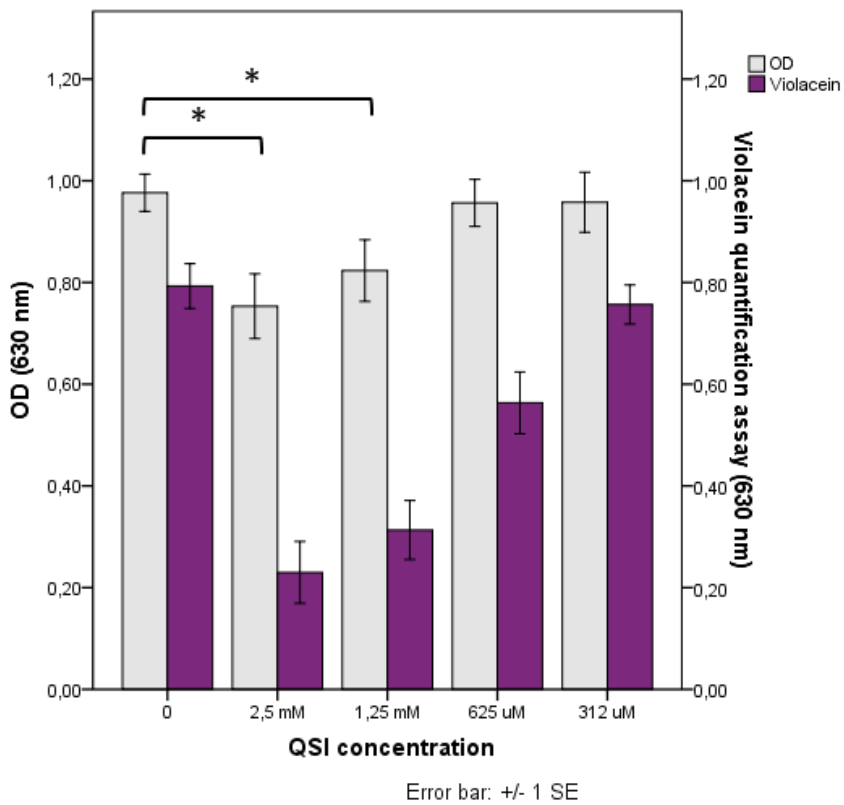

**Figure S6.** Violacein quantification assay for **12Z**.

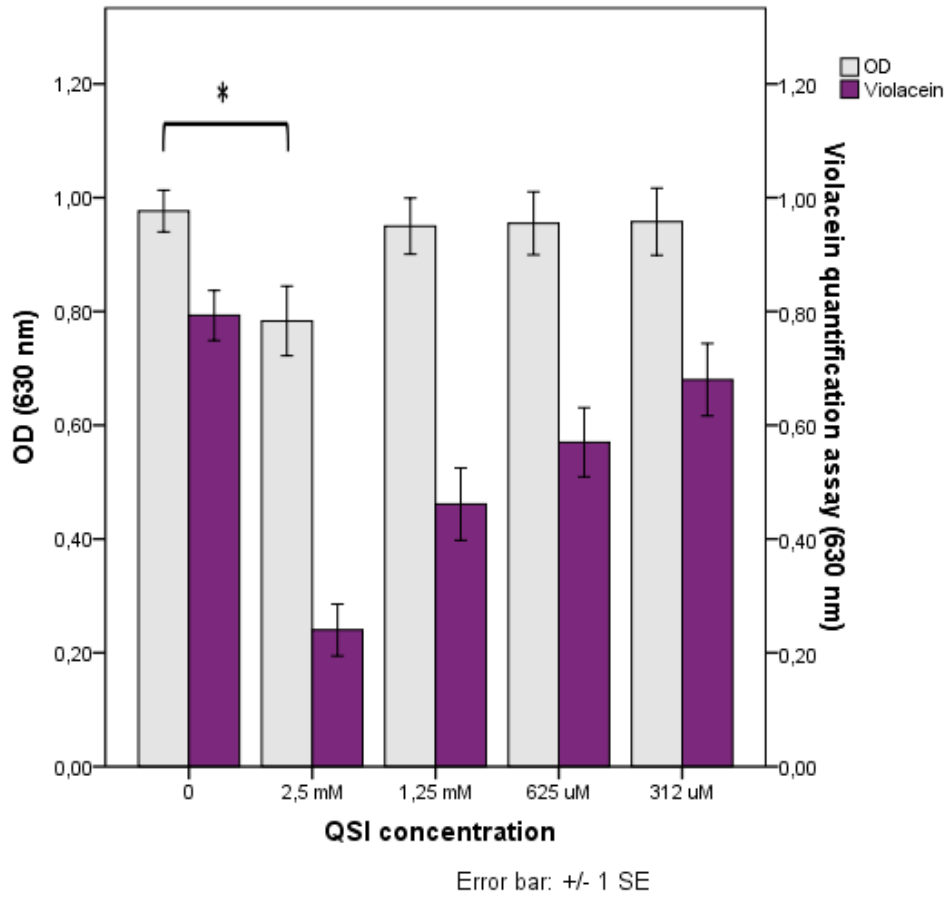

**Figure S7.** Violacein quantification assay for **13E**.

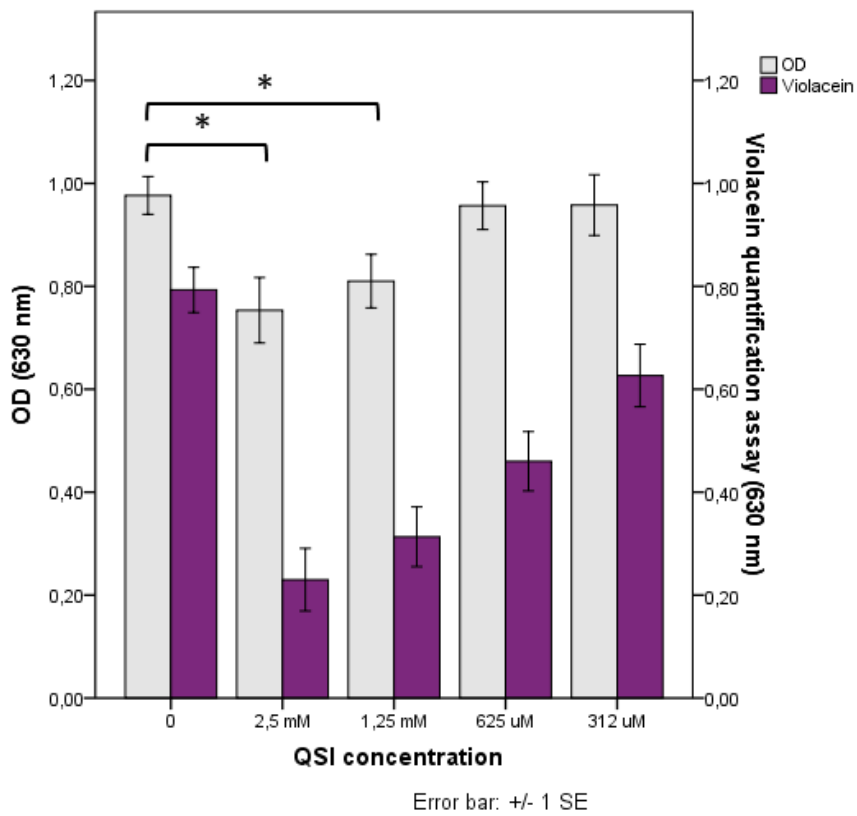

**Figure S8.** Violacein quantification assay for **13Z**.

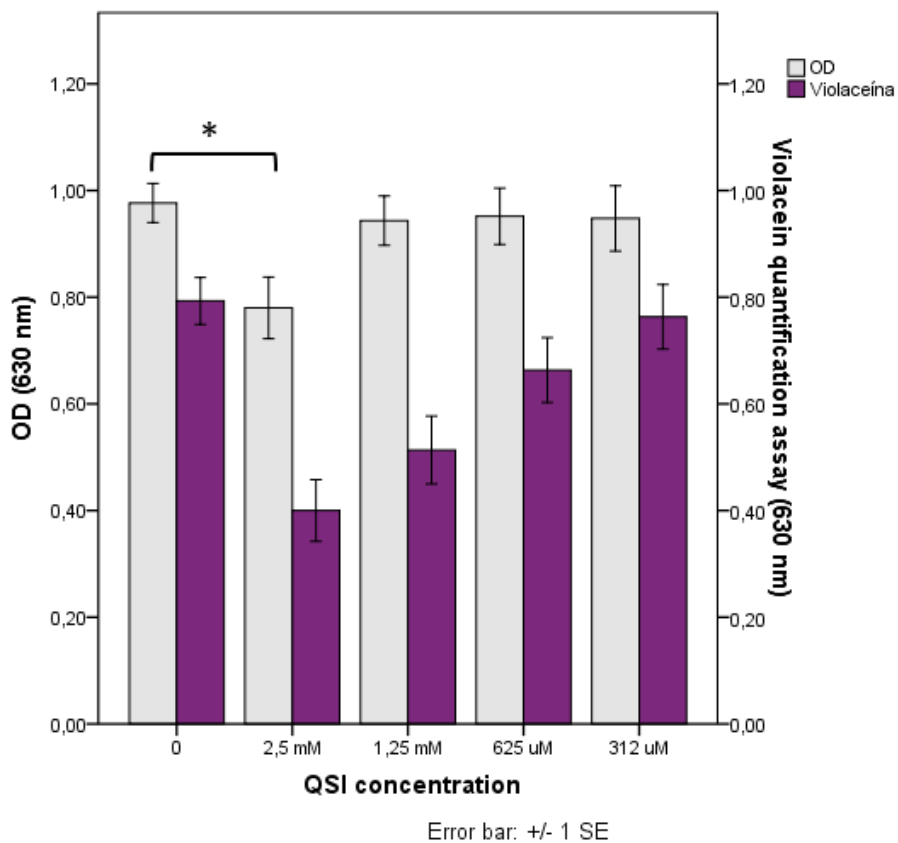

**Figure S9.** Violacein quantification assay for **14E**.

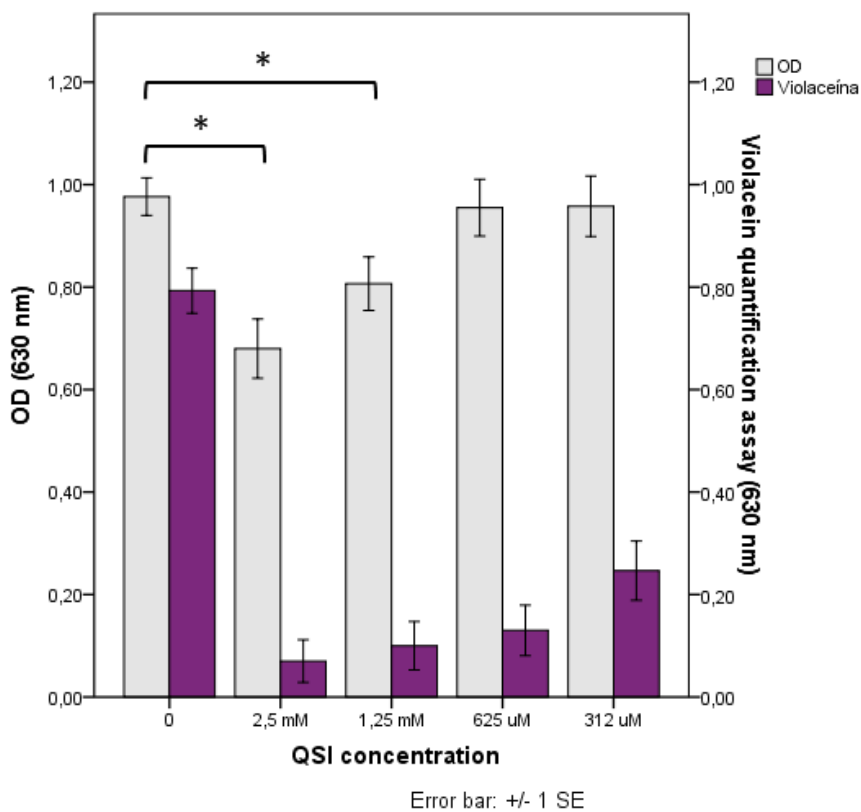

**Figure S10.** Violacein quantification assay for **15E**.

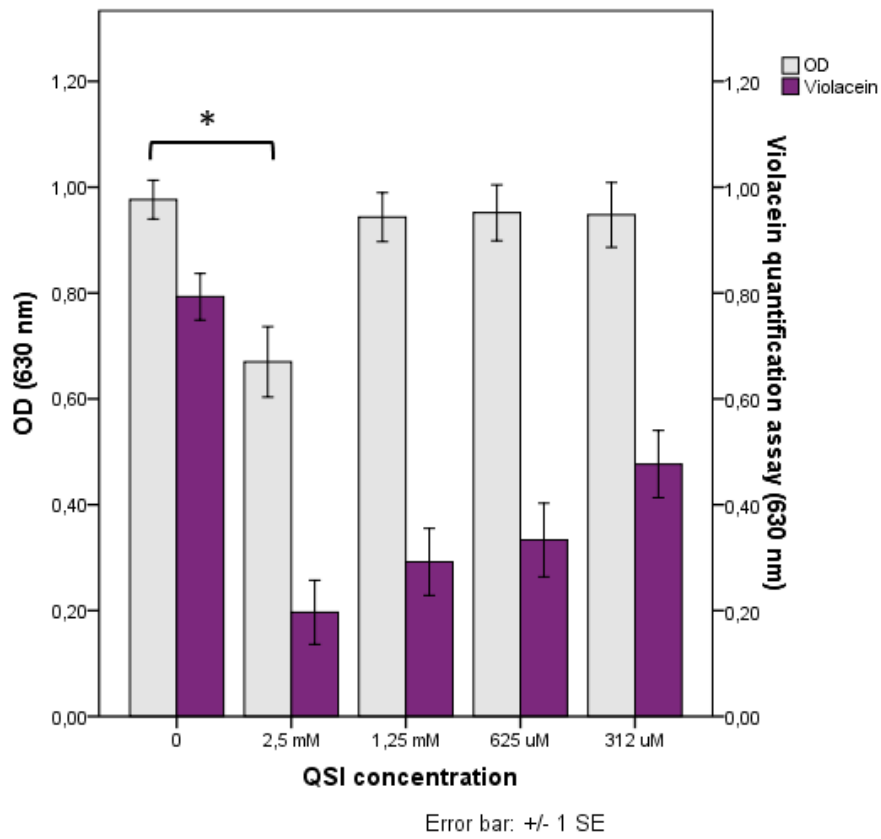

Figure S11. Violacein quantification assay for **16E**.

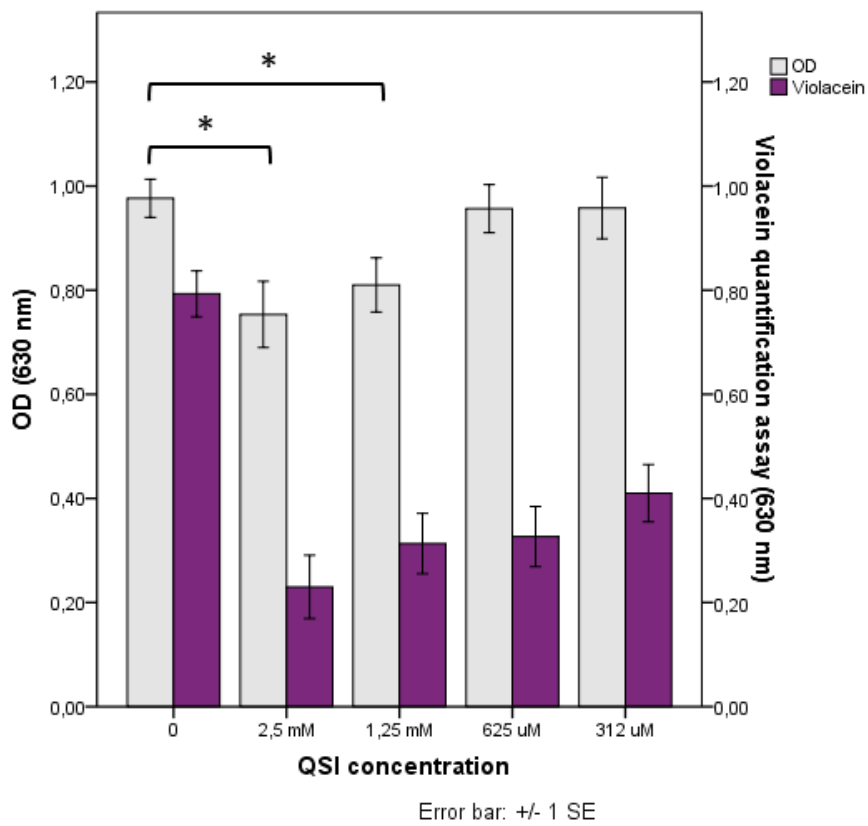

Figure S12. Violacein quantification assay for **17E**.

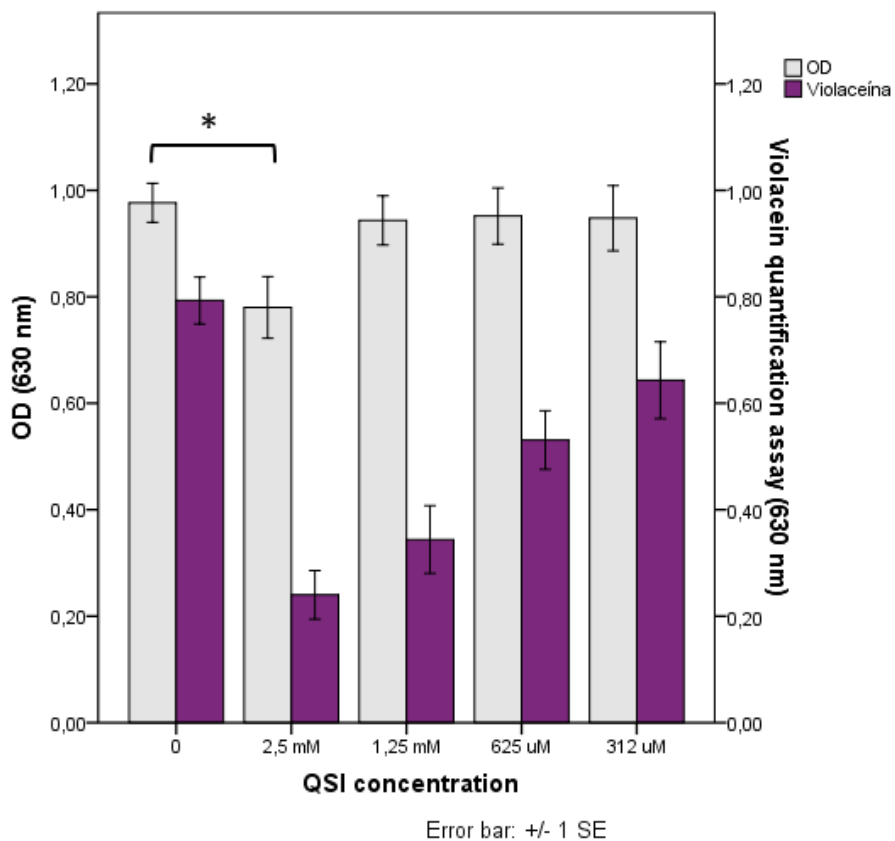

Figure S13. Violacein quantification assay for **18E**.

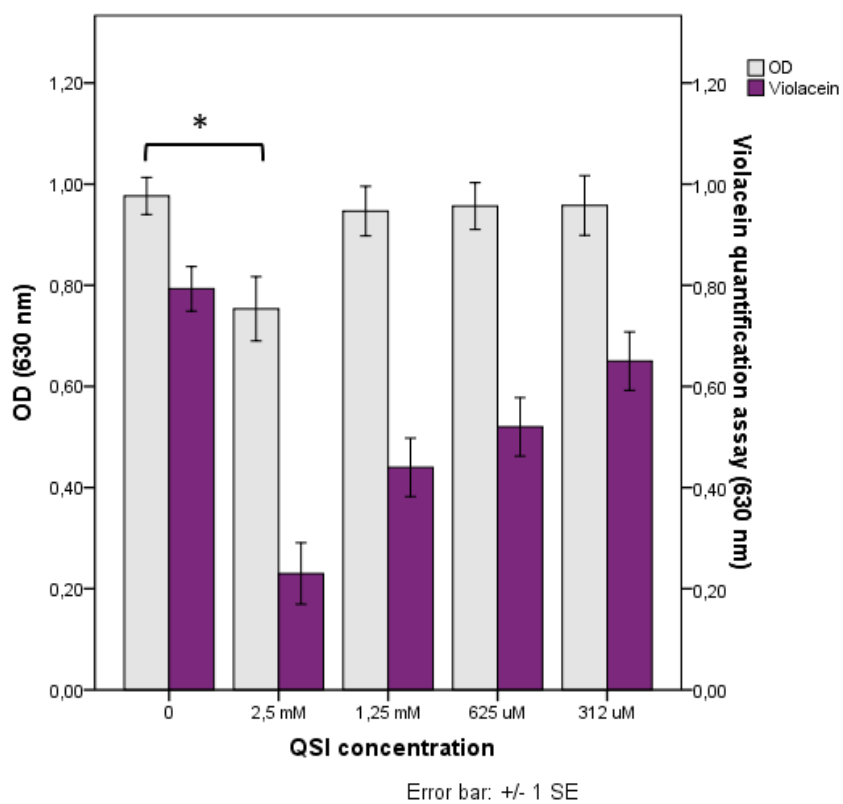

Figure S14. Violacein quantification assay for **19E**.



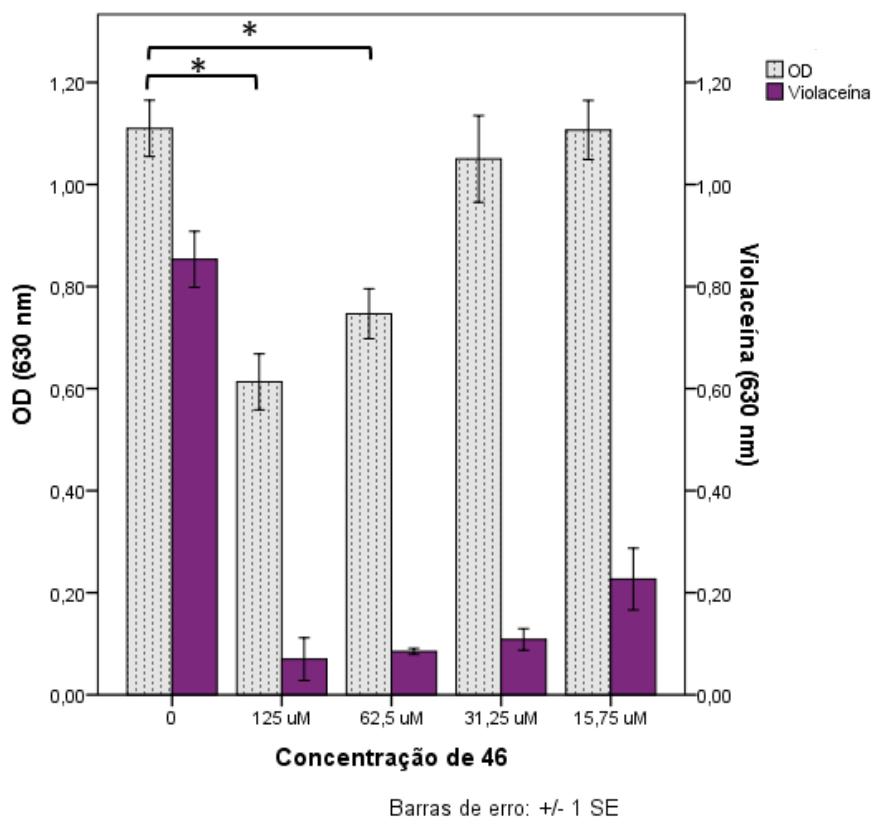

Figure S15. Violacein quantification assay for **20**.

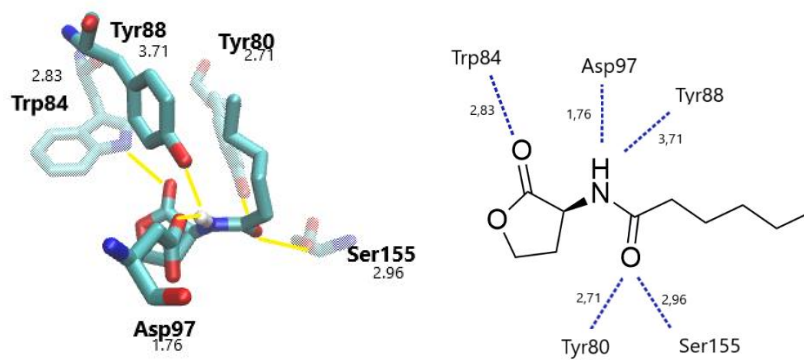

Figure S16. Ligand binding domain for **2/CviR**.

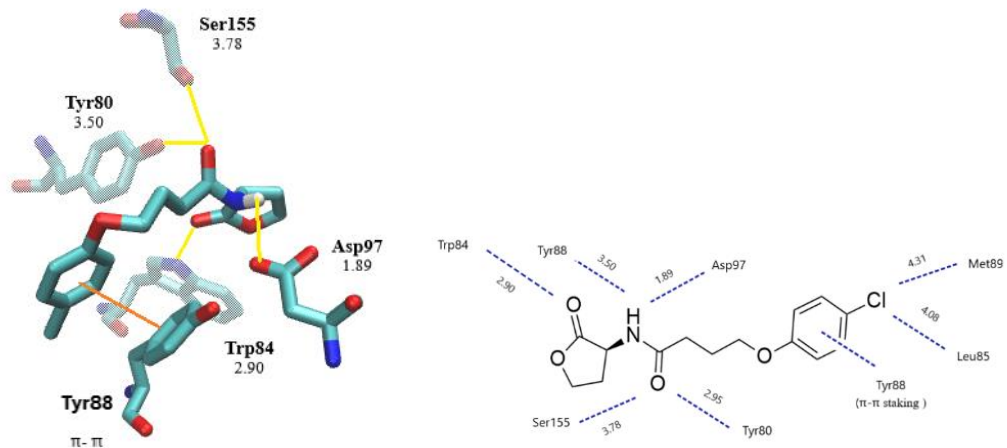

**Figure S17.** Ligand binding domain for **20/CviR**.

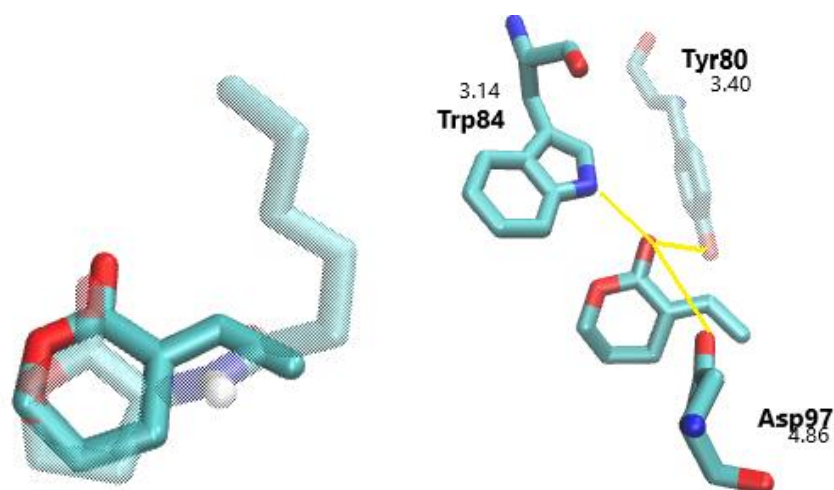

**Figure S18.** Overlap of **2** with **10E**, and ligand binding domain for **10E/CviR**, respectively.

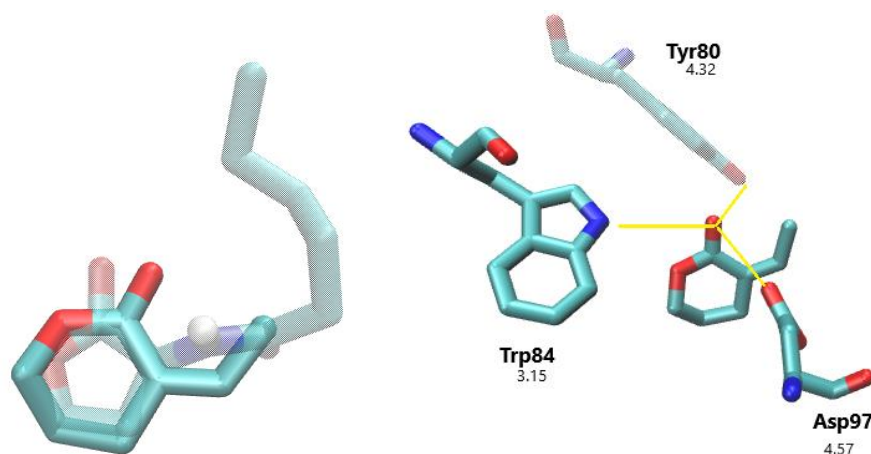

**Figure S19.** Overlap of **2** with **10Z**, and ligand binding domain for **10Z/CviR**, respectively.

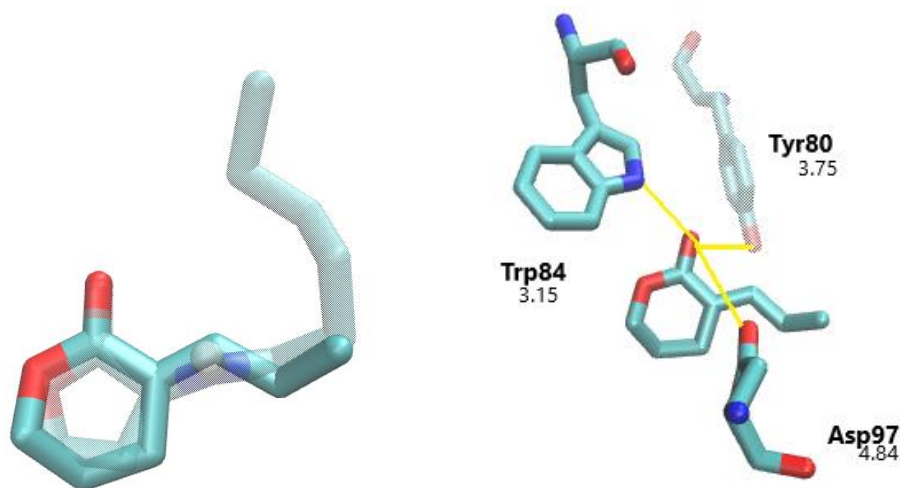

**Figure S20.** Overlap of **2** with **11E**, and ligand binding domain for **11E/CviR**, respectively.

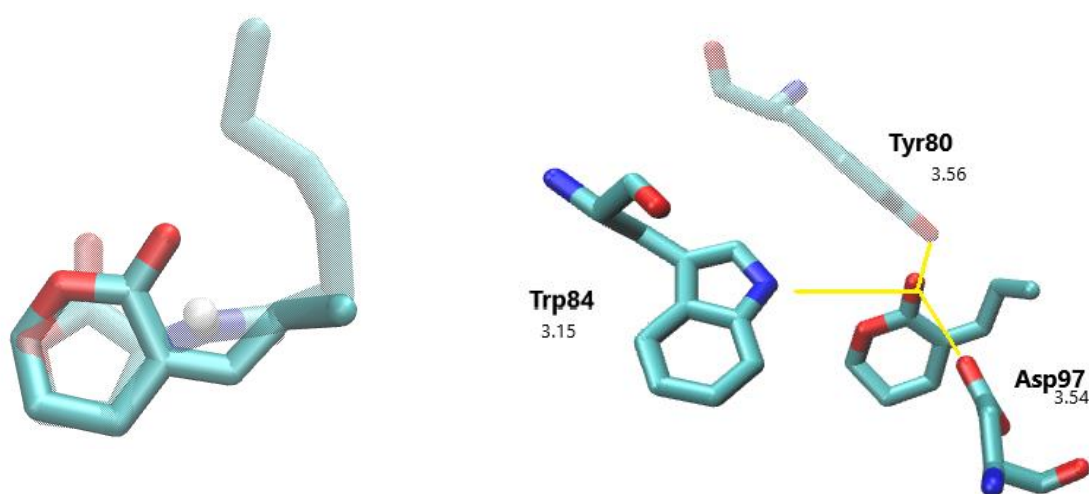

**Figure S21.** Overlap of **2** with **11Z**, and ligand binding domain for **11Z/CviR**, respectively.

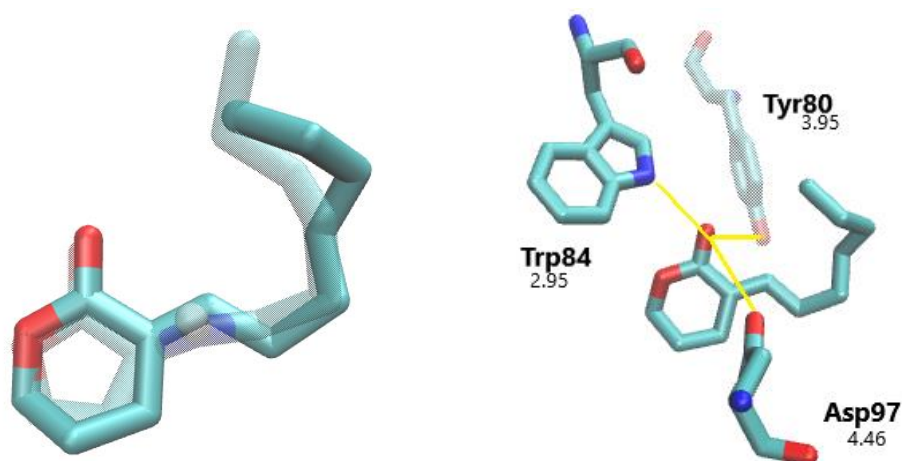

**Figure S22.** Overlap of **2** with **12E**, and ligand binding domain for **12E/CviR**, respectively.

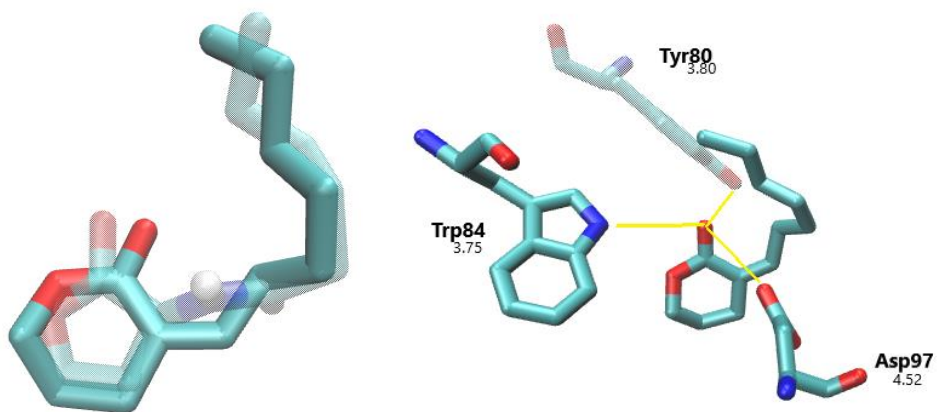

**Figure S23.** Overlap of 2 with 12Z, and ligand binding domain for 12Z/CviR, respectively.

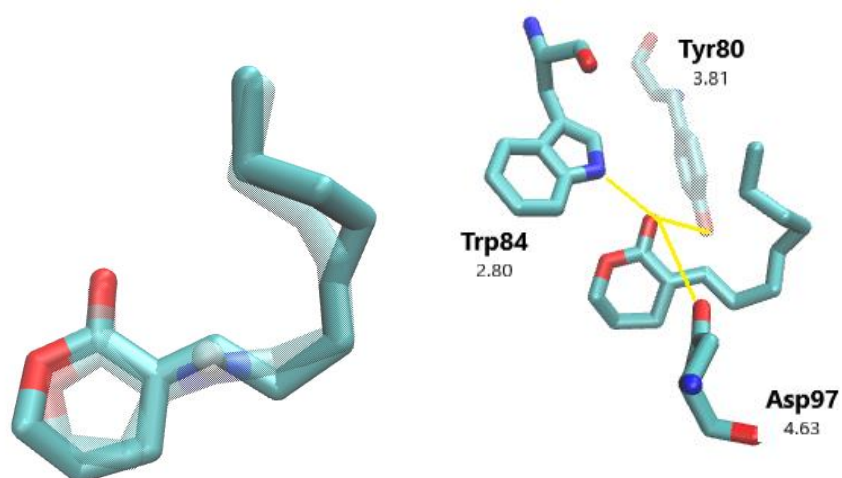

**Figure S24.** Overlap of 2 with 13E, and ligand binding domain for 13E/CviR, respectively.

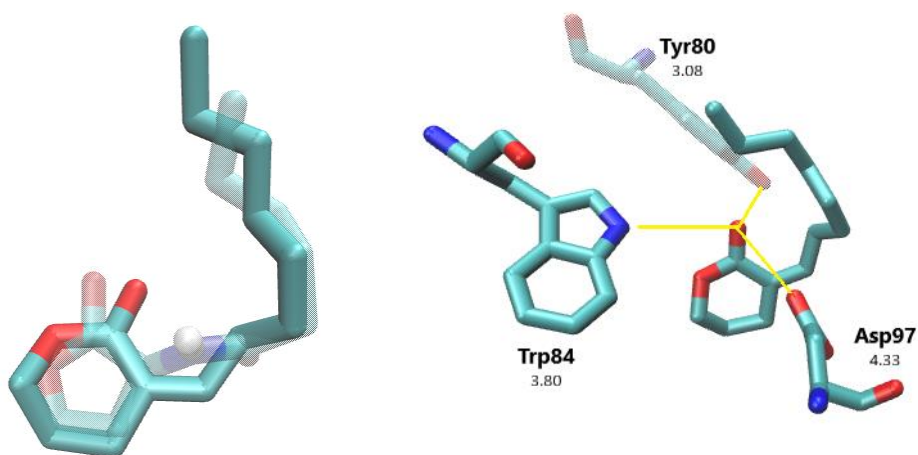

**Figure S25.** Overlap of 2 with 13Z, and ligand binding domain for 13Z/CviR, respectively.

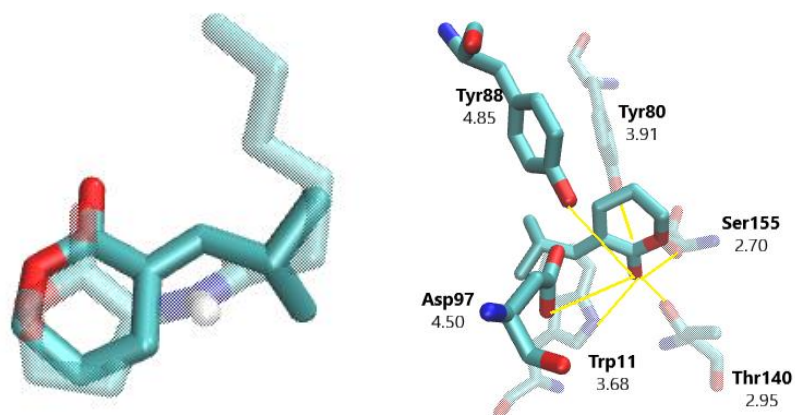

**Figure S26.** Overlap of **2** with **14E**, and ligand binding domain for **14E/CviR**, respectively.

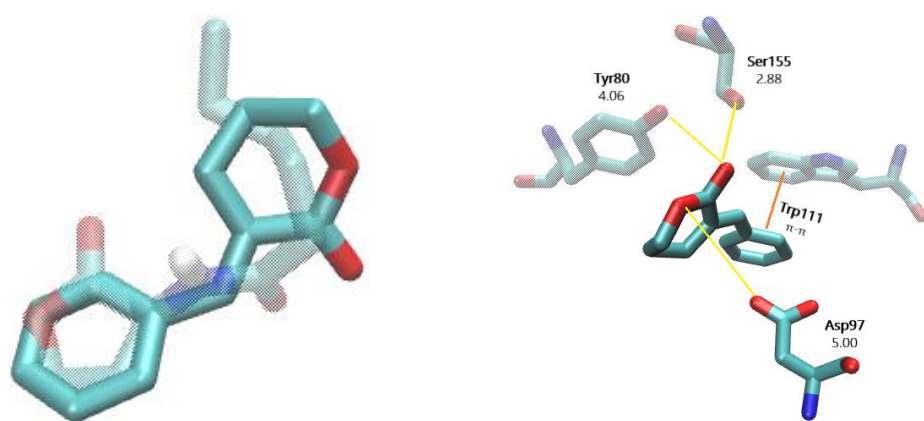

**Figure S27.** Overlap of **2** with **15E**, and ligand binding domain for **15E/CviR**, respectively.

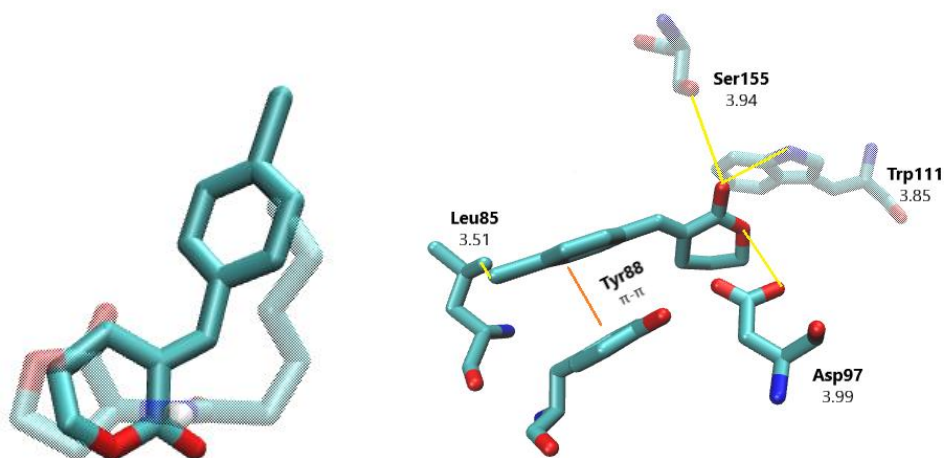

**Figure S28.** Overlap of **2** with **16E**, and ligand binding domain for **16E/CviR**, respectively.



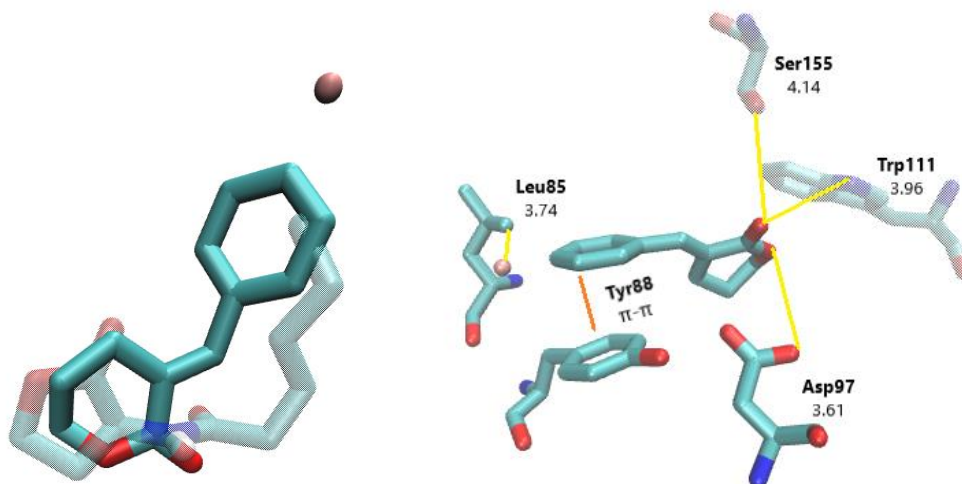

**Figure S29.** Overlap of **2** with **17E**, and ligand binding domain for **17E/CviR**, respectively.

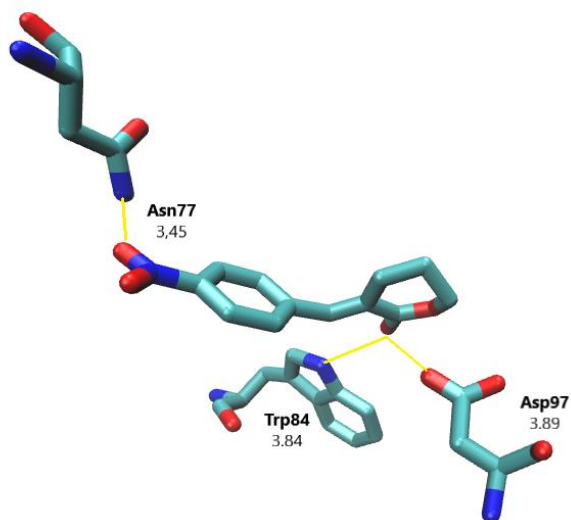

**Figure S30.** Overlap of **2** with **18E**, and ligand binding domain for **18E/CviR**, respectively.

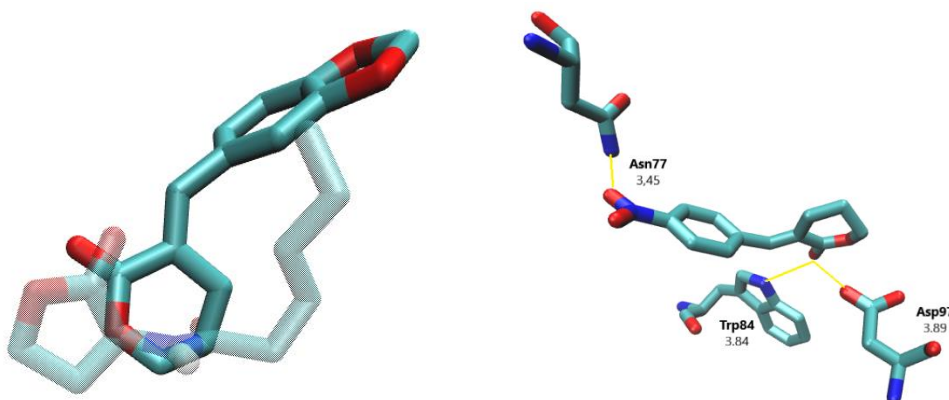

**Figure S31.** Overlap of **2** with **19E**, and ligand binding domain for **19E/CviR**, respectively.

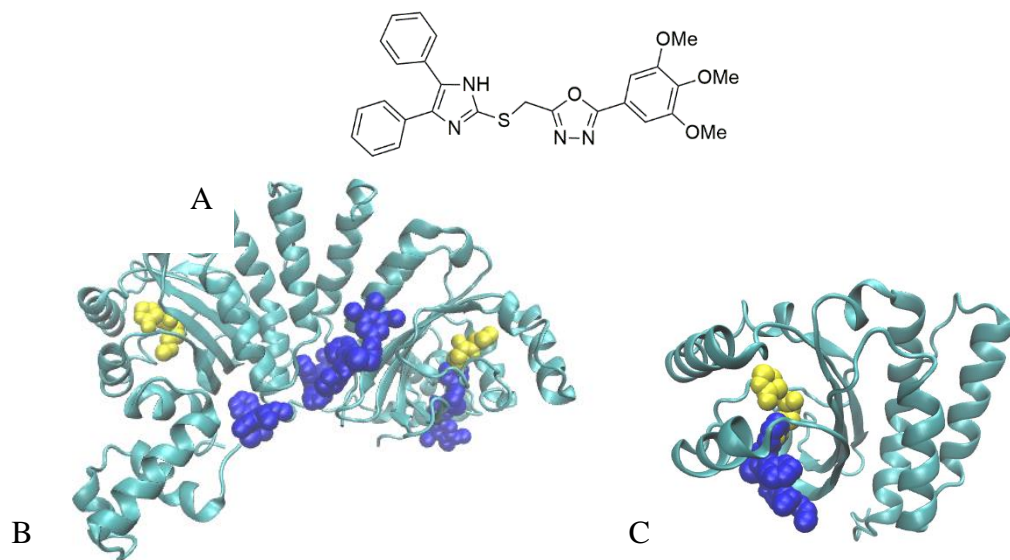

**Figure S32.** (A): Chemical structure of **21**.; B: CviR (PDB ID: 3PQ5) complex with **21**(blue), in yellow is shown HHL to exemplify the LBD.; (C): LBD complex with **21**(blue), in yellow is shown HHL (**2**) to exemplify the LBD.

2. NMR spectrums:

S2.1.  $^1\text{H}$  NMR (600 MHz) spectrum of **8** (*E/Z*) **R** = **Methyl** in  $\text{CDCl}_3$ .

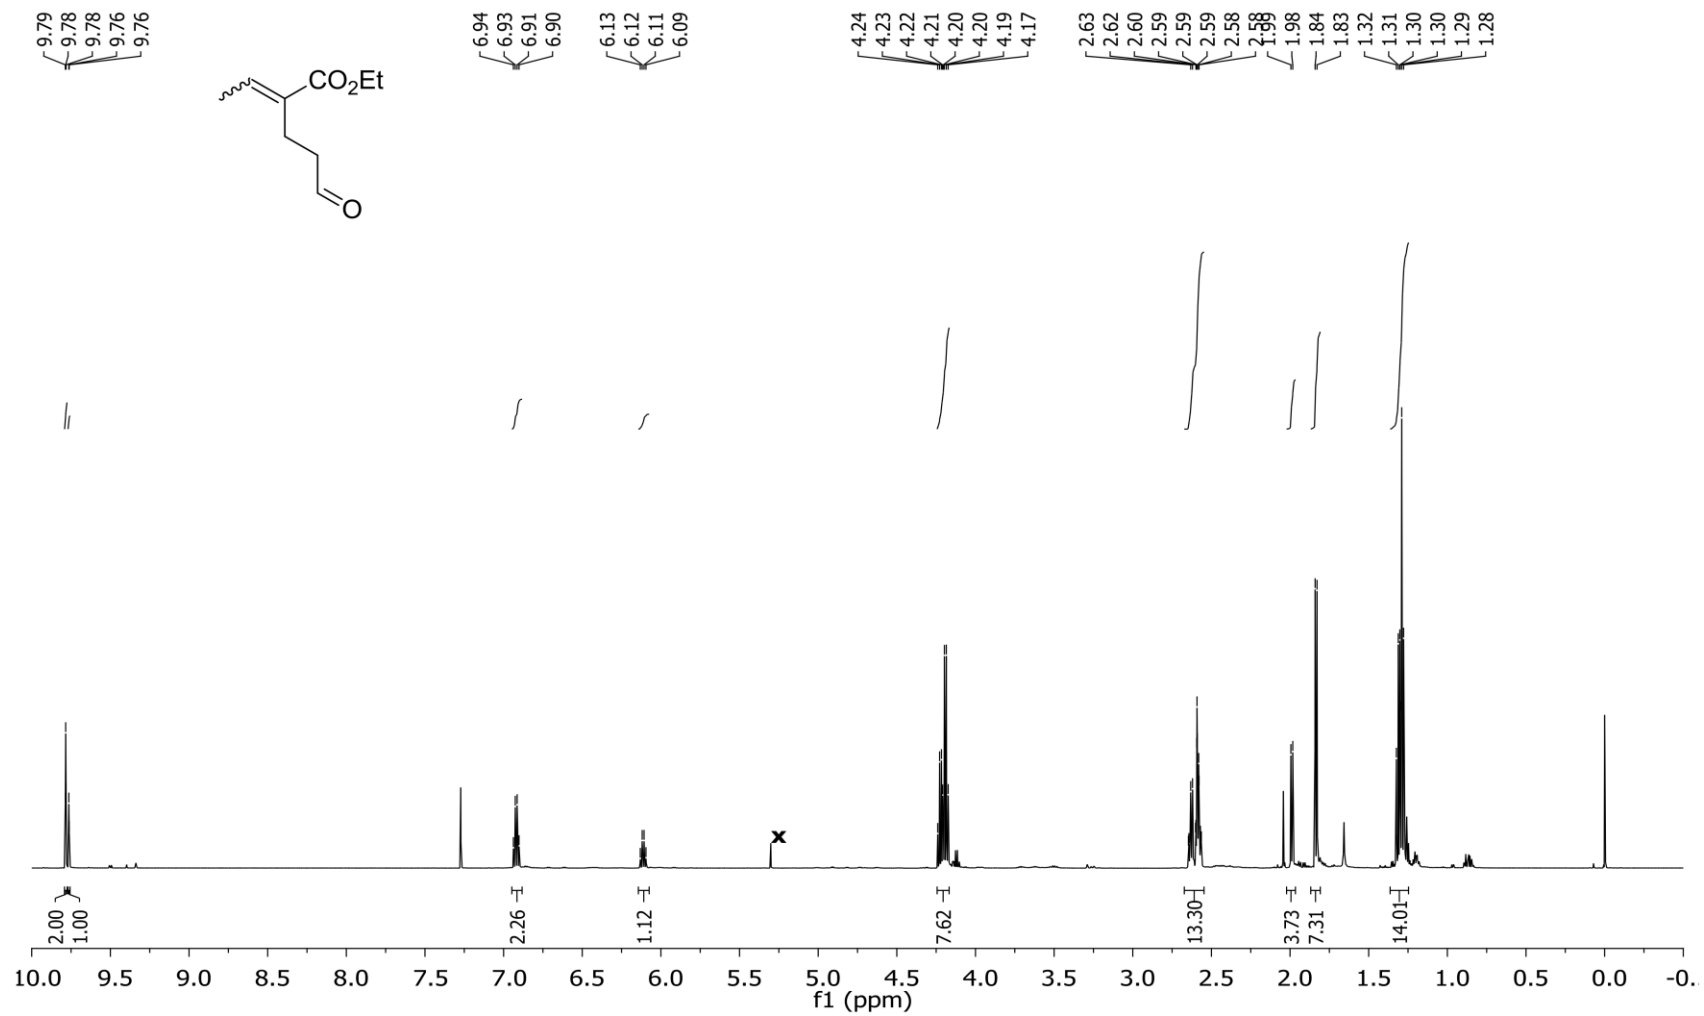



S2.2.  $^{13}\text{C}$  NMR (75 MHz) spectrum of **8** (*E/Z*) **R** = Methyl in  $\text{CDCl}_3$

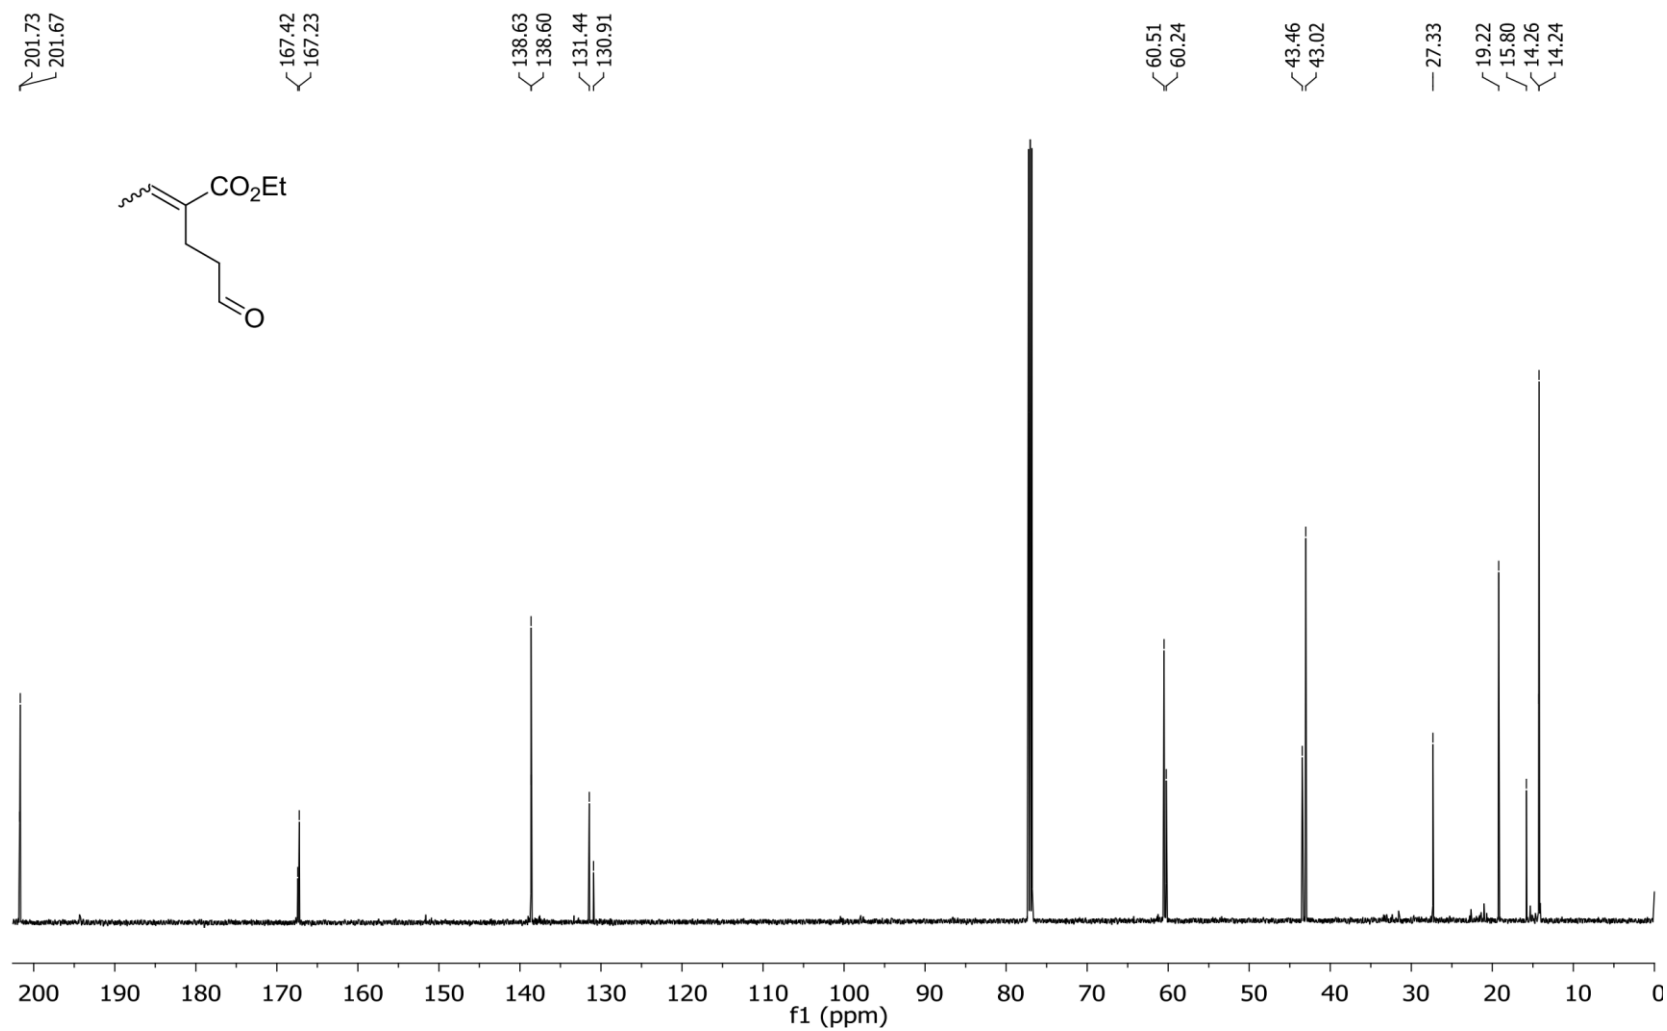

S2.3.  $^1\text{H}$  NMR (600 MHz) spectrum of **8** (*E/Z*) **R** = Ethyl in  $\text{CDCl}_3$ .

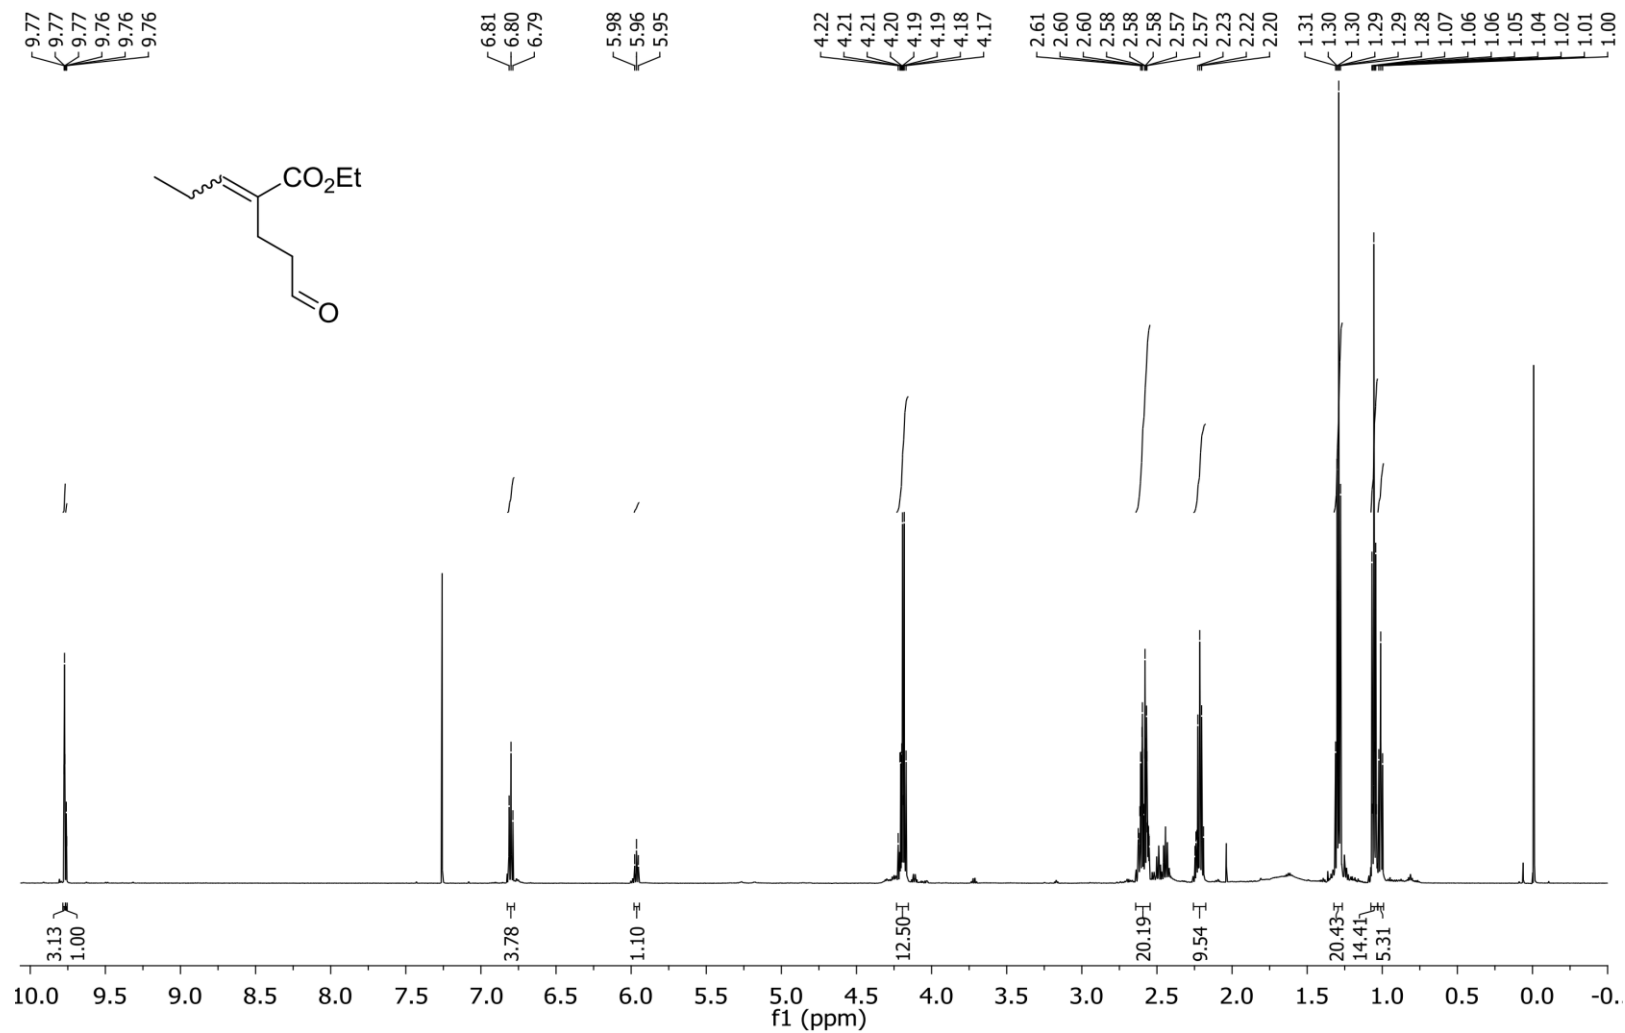

S2.4.  $^{13}\text{C}$  NMR (75 MHz) spectrum of **8** (*E/Z*) **R** = Ethyl in  $\text{CDCl}_3$ .

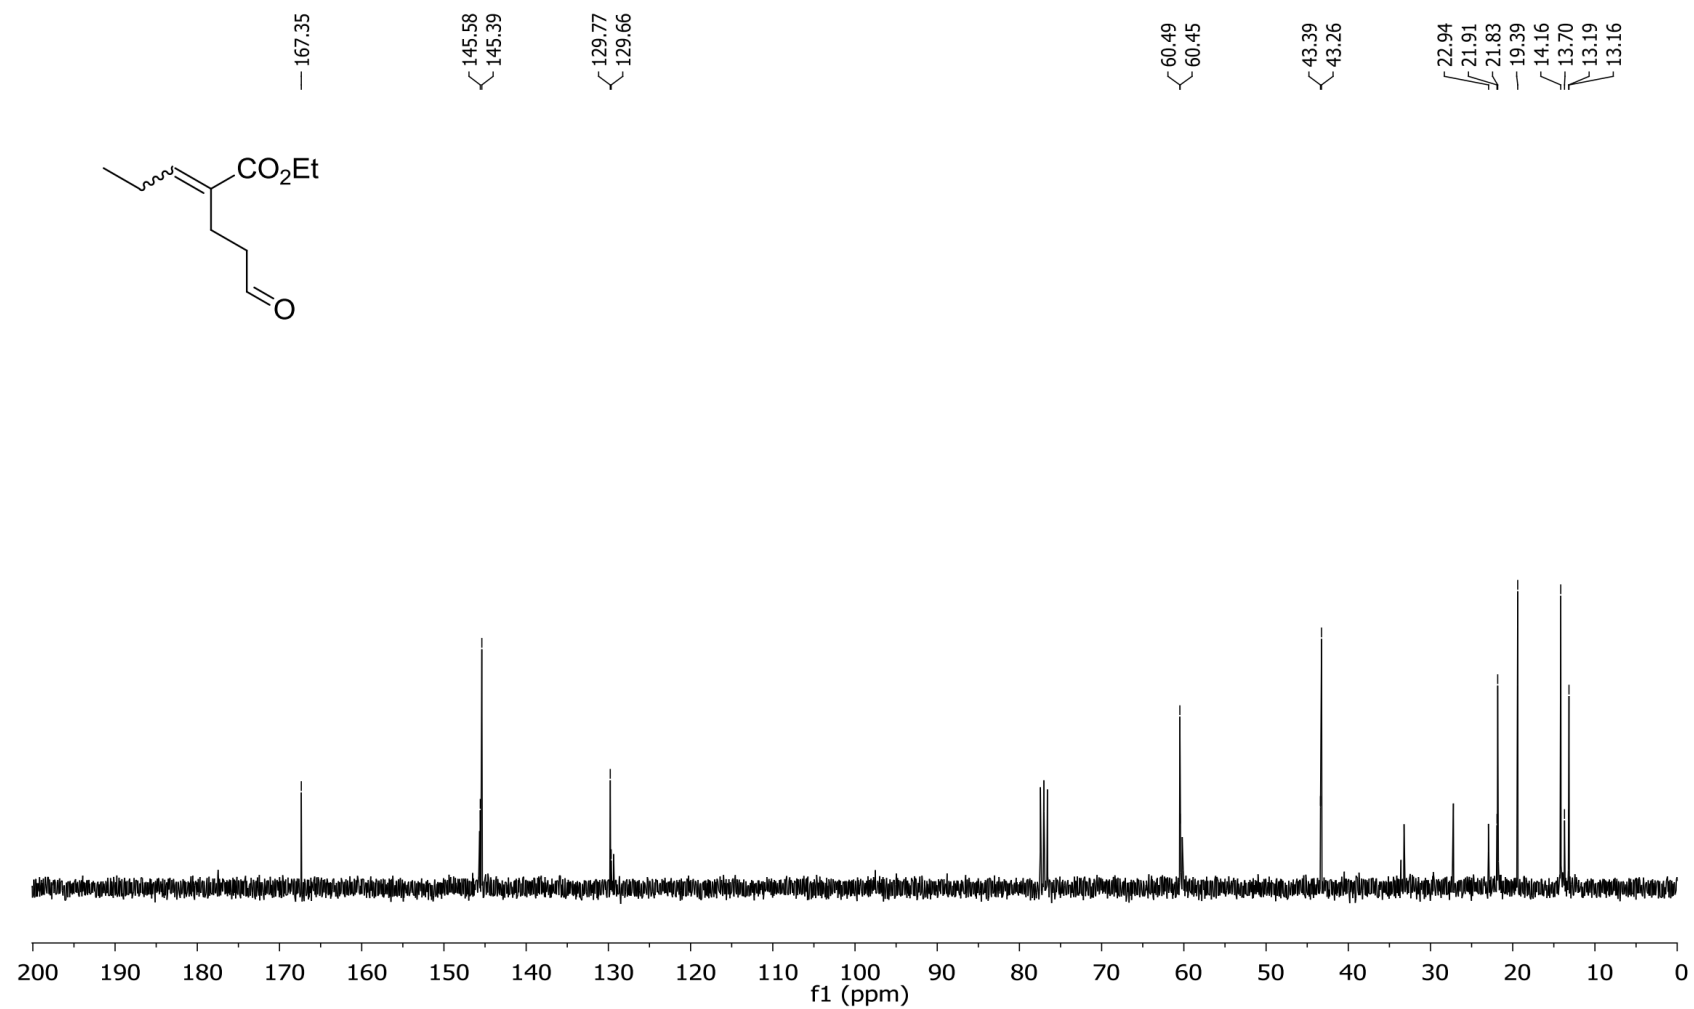

S2.5.  $^1\text{H}$  NMR (600 MHz) spectrum of **8** (*E/Z*) **R** = *n*-Hexyl in  $\text{CDCl}_3$ .

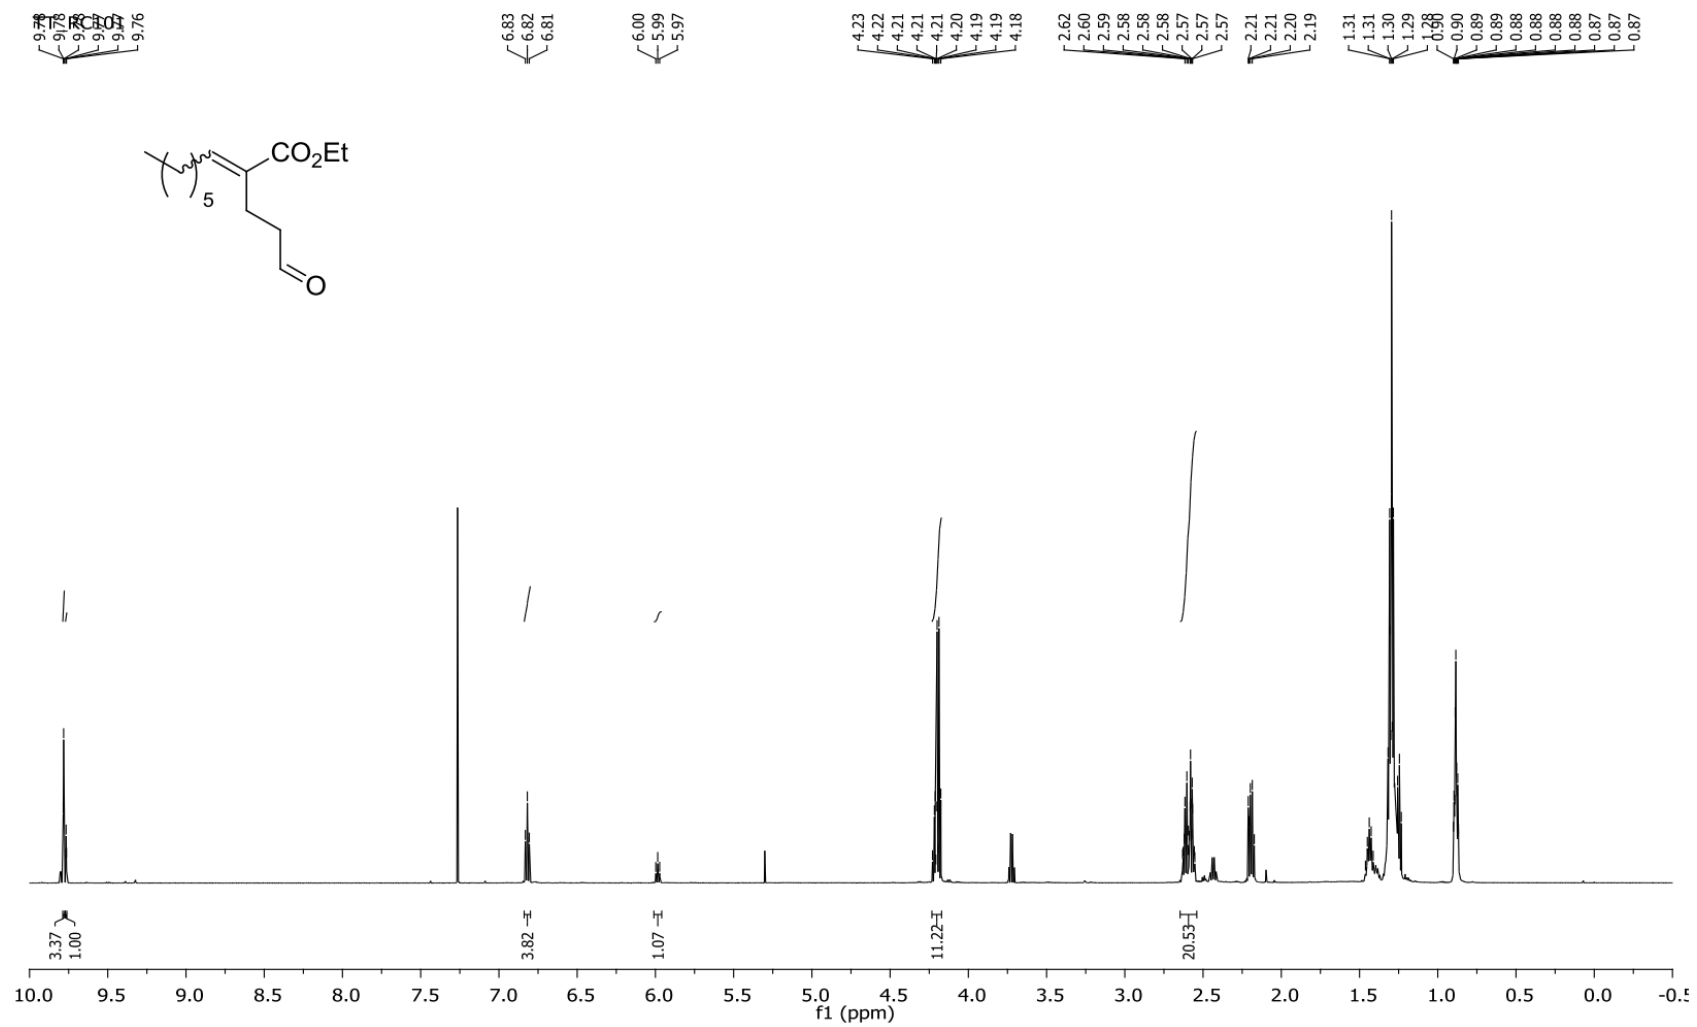

S2.6.  $^{13}\text{C}$  NMR (151 MHz) spectrum of **8** (*E/Z*) **R** = *n*-Hexyl in  $\text{CDCl}_3$ .

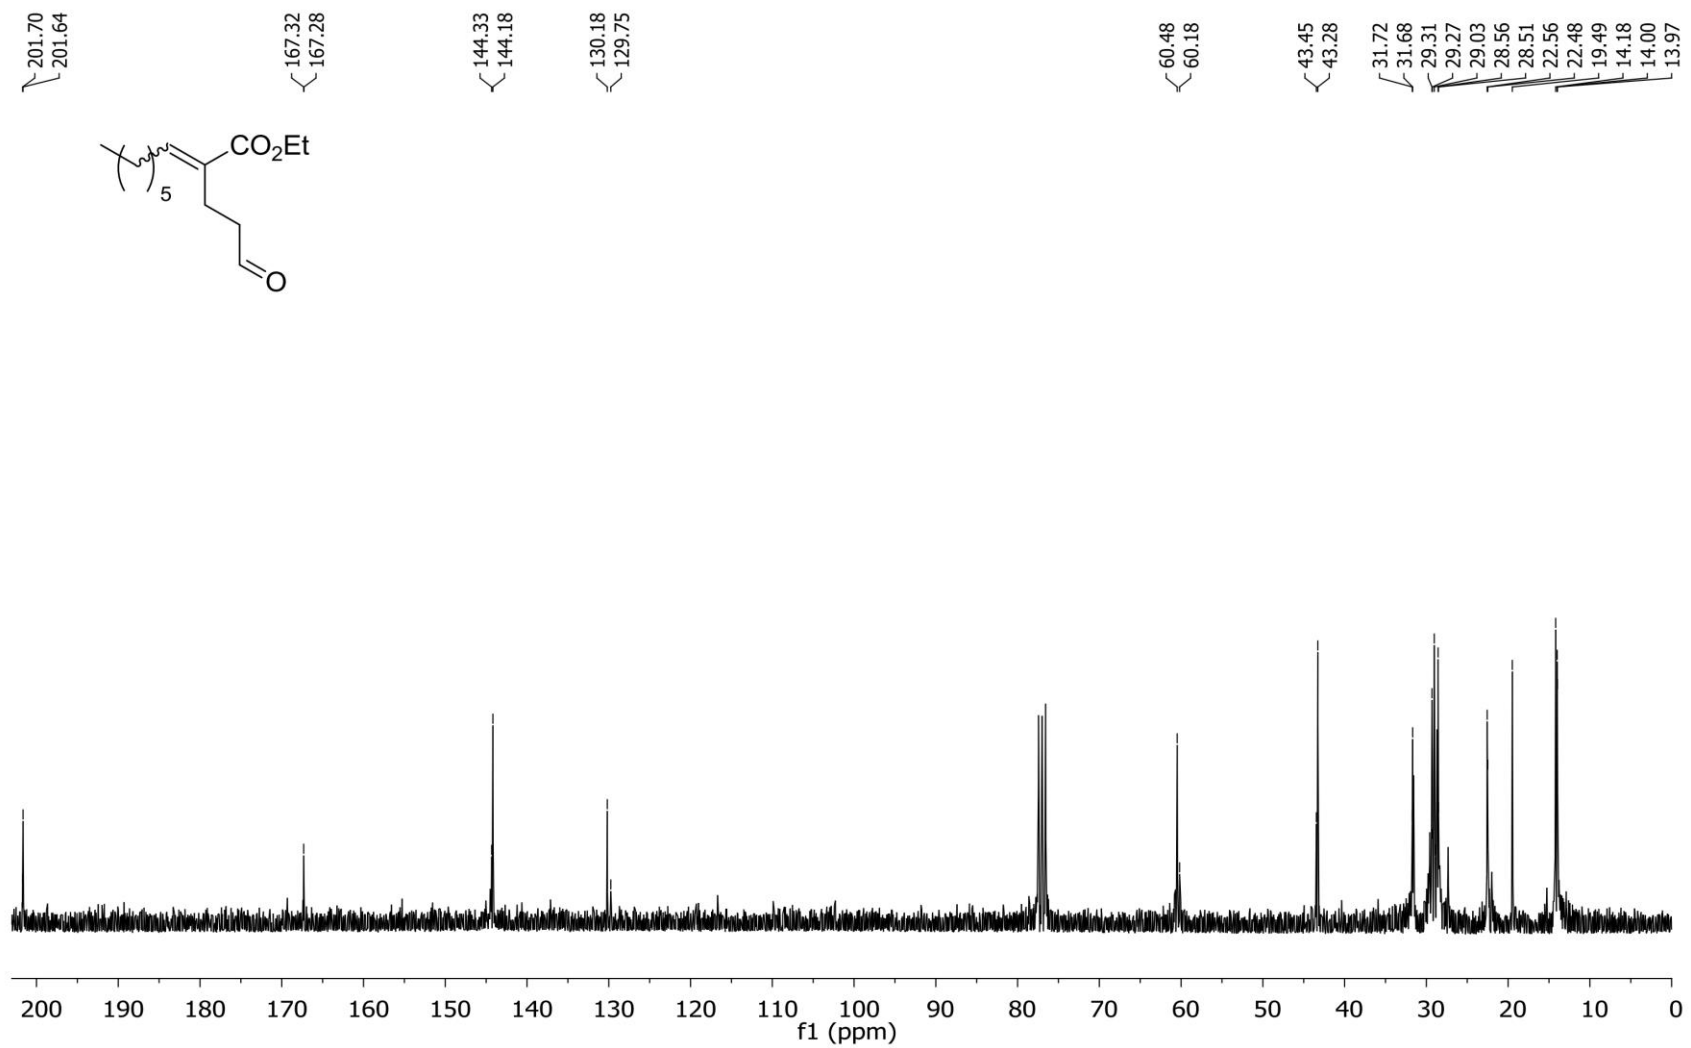

S2.7.  $^1\text{H}$  NMR (600 MHz) spectrum of **8** (*E/Z*) **R** = *n*-Heptyl in  $\text{CDCl}_3$ .

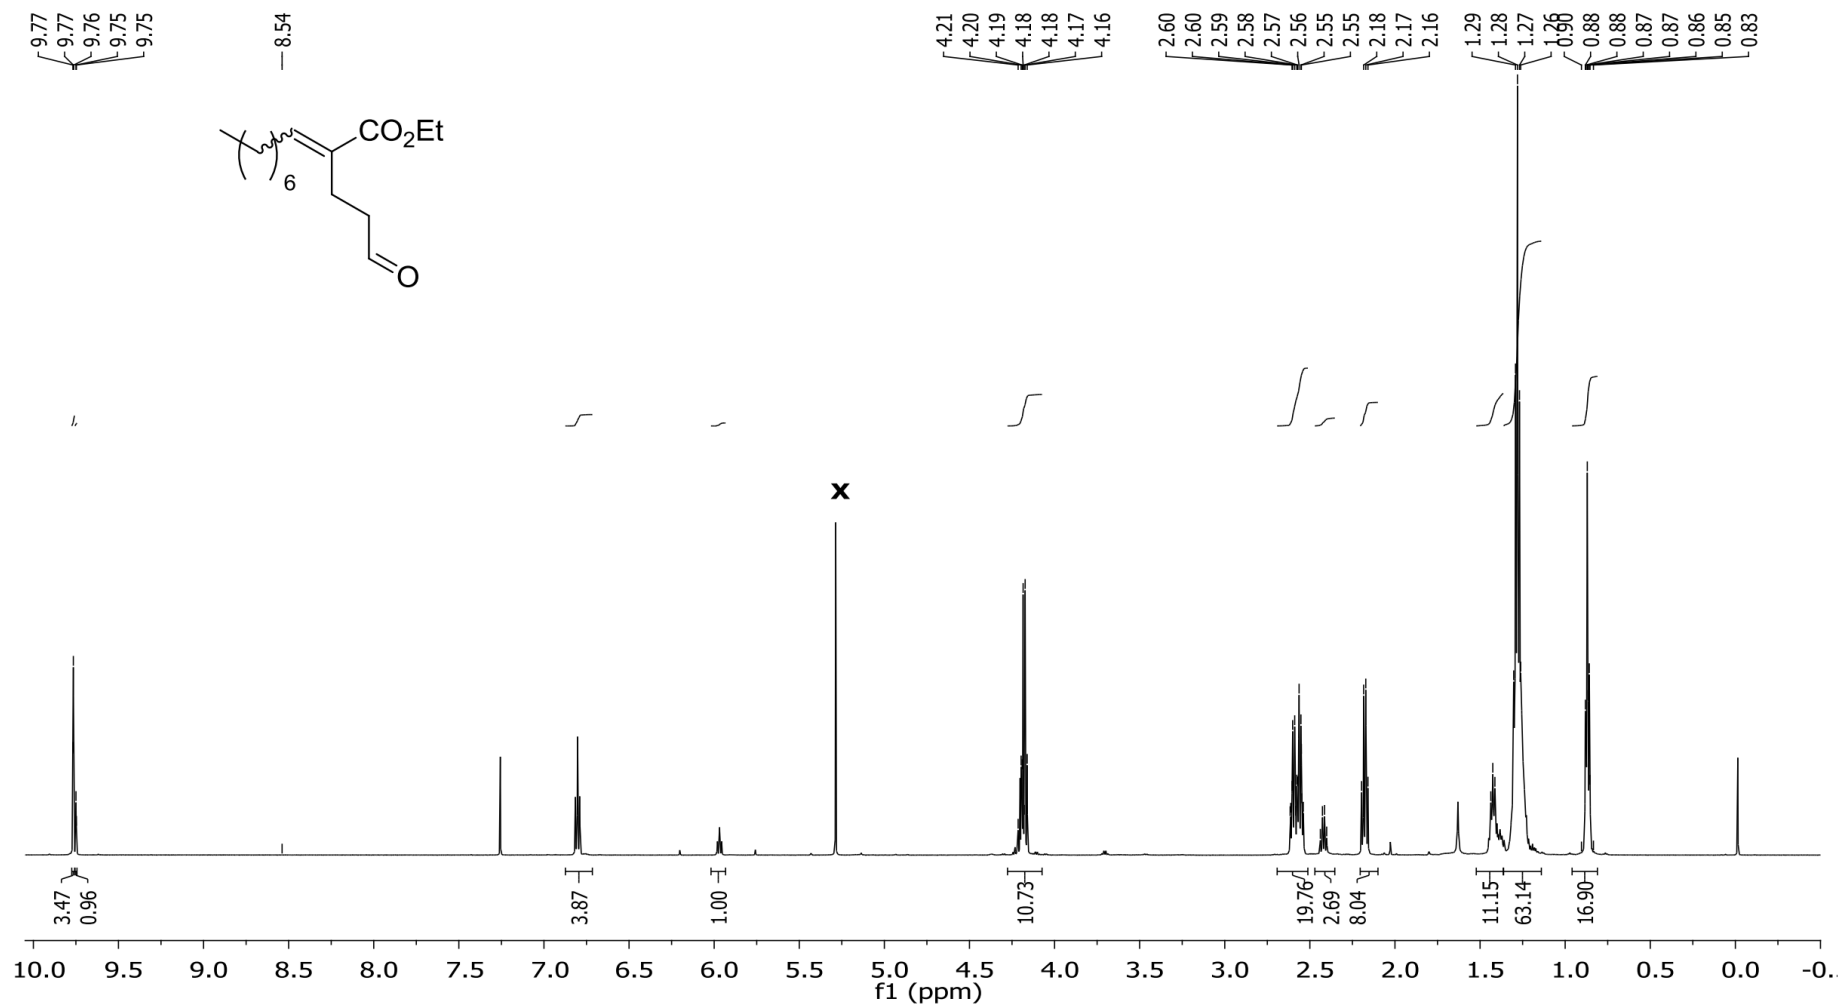

S2.8.  $^{13}\text{C}$  NMR (151 MHz) spectrum of **8** (*E/Z*) **R** = *n*-Heptyl in  $\text{CDCl}_3$ .

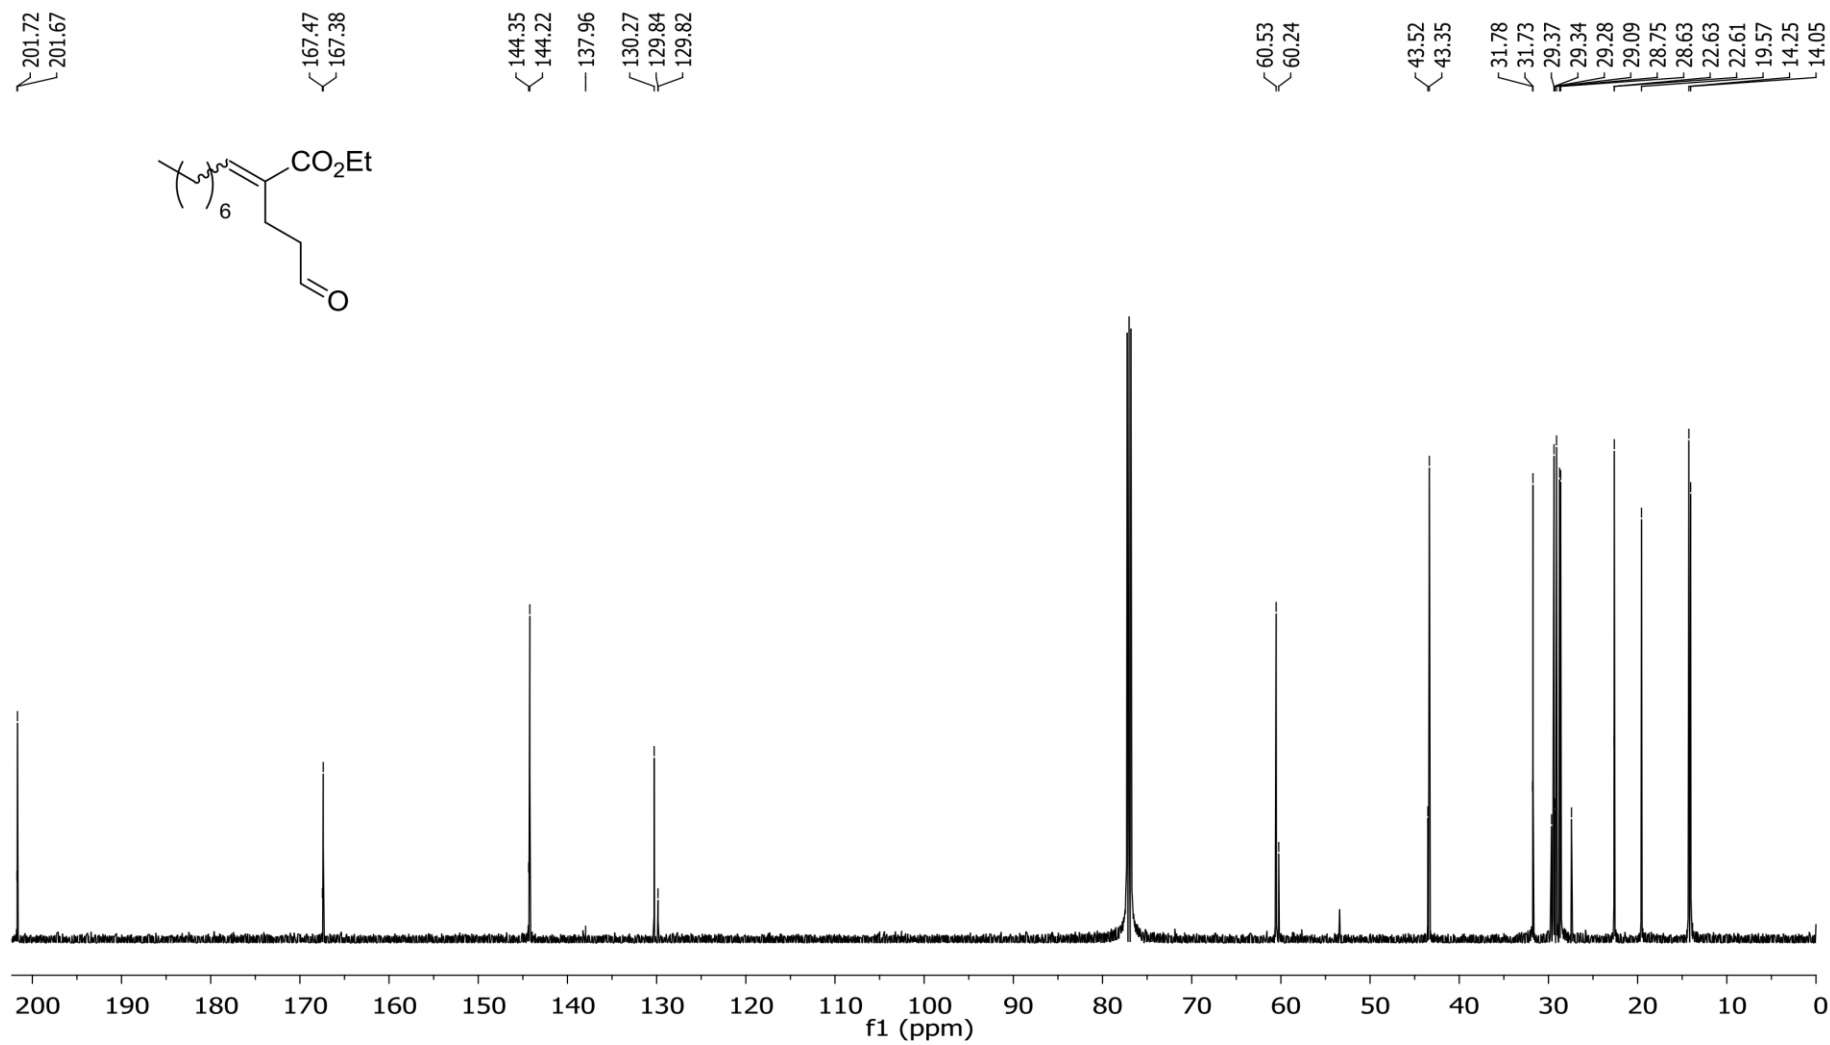

S2.9.  $^1\text{H}$  NMR (600 MHz) spectrum of **8** (*E/Z*) **R** = *iso*-Propyl in  $\text{CDCl}_3$ .

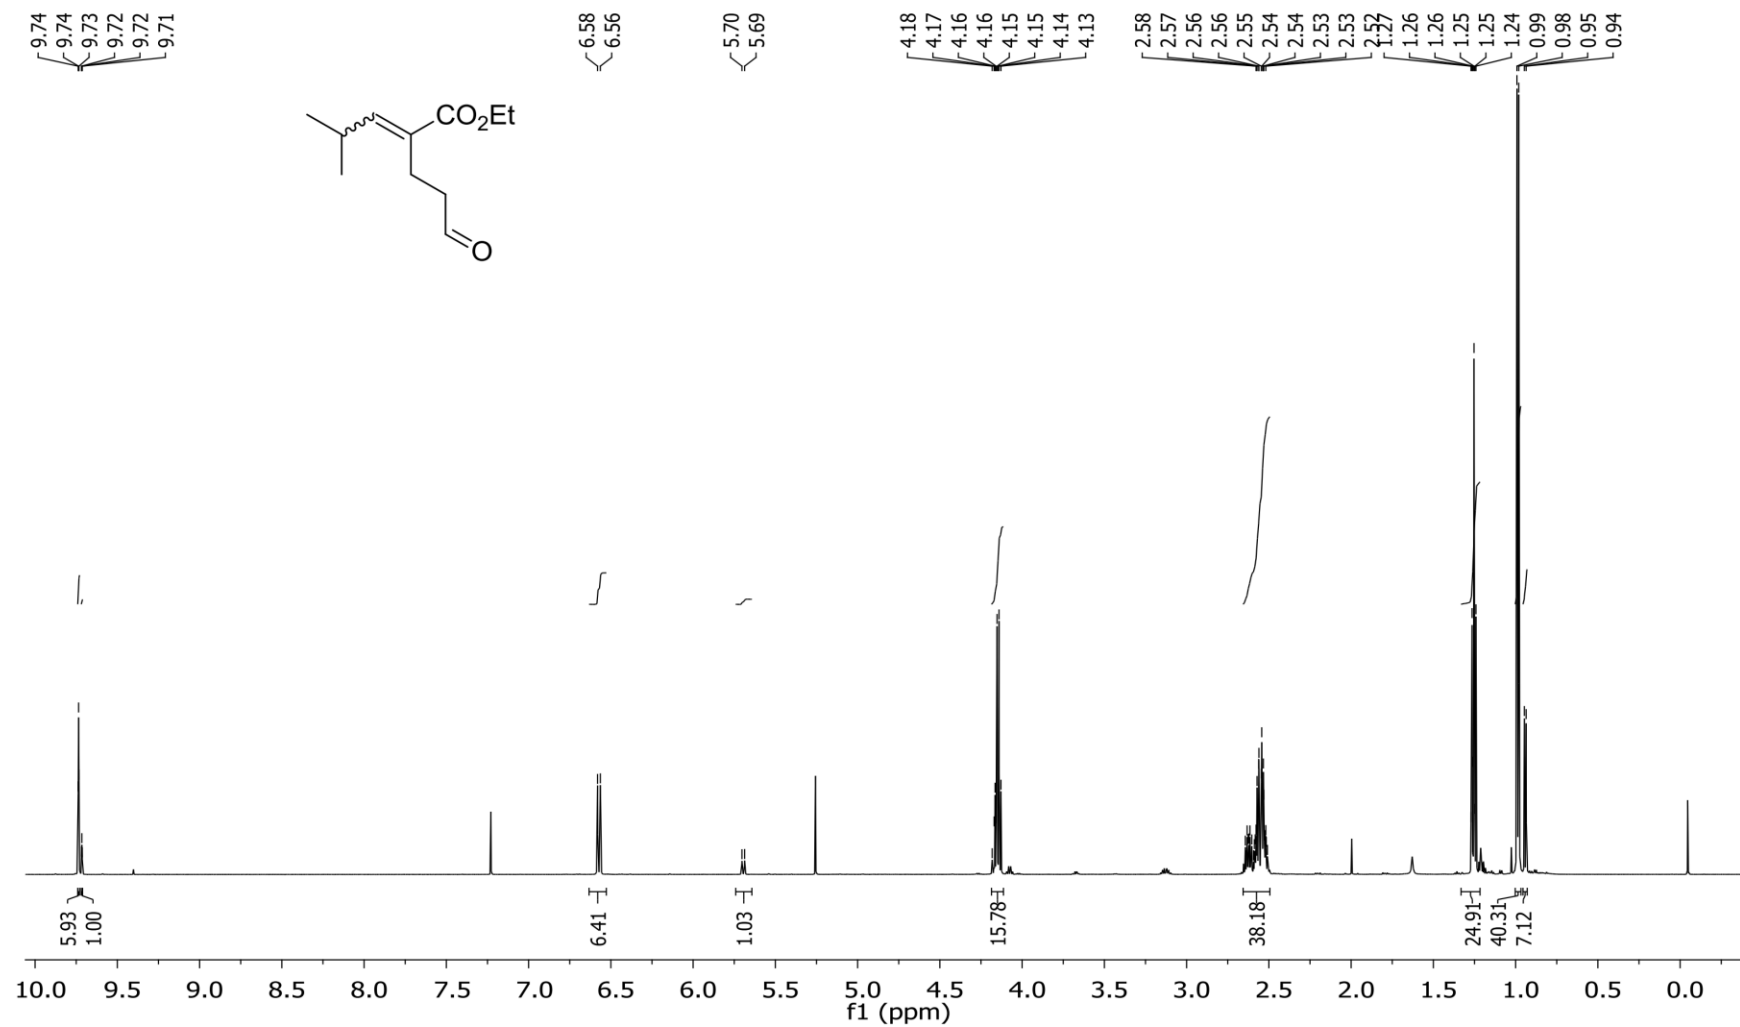



S2.10.  $^{13}\text{C}$  NMR (151 MHz) spectrum of **8** (*E/Z*) **R** = *iso*-Propyl in  $\text{CDCl}_3$ .

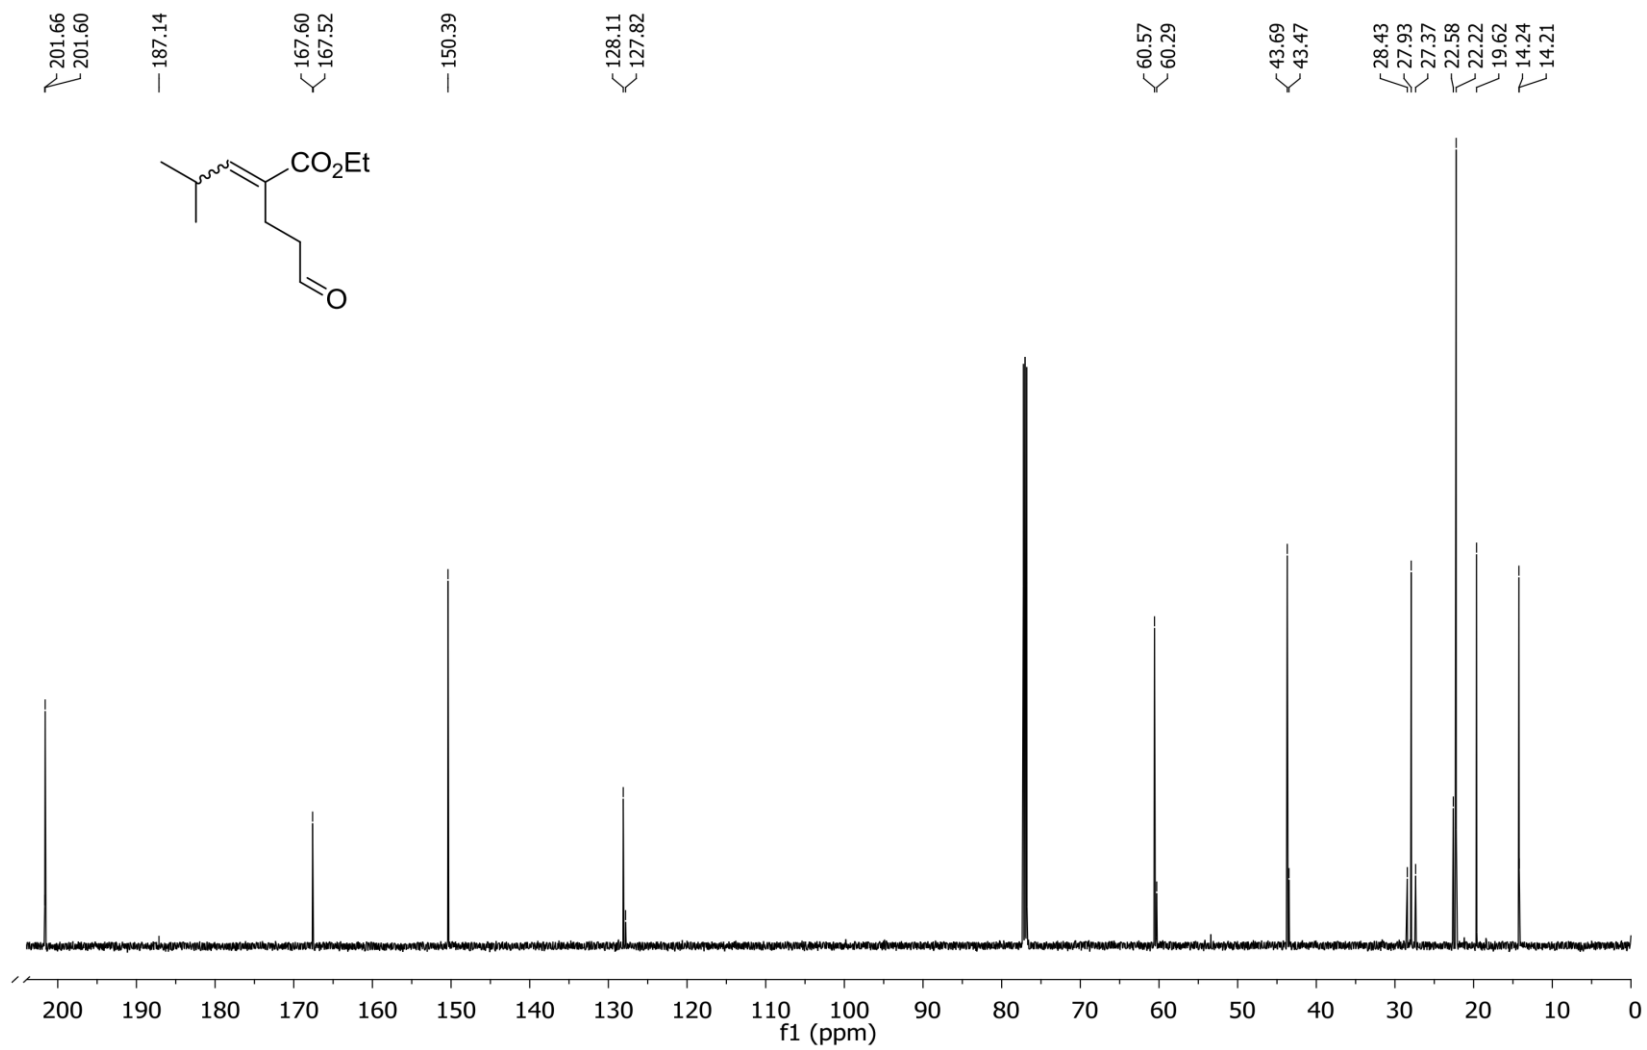

S2.11.  $^1\text{H}$  NMR (600 MHz) spectrum of **8** (*E*) **R** = Phenyl in  $\text{CDCl}_3$ .

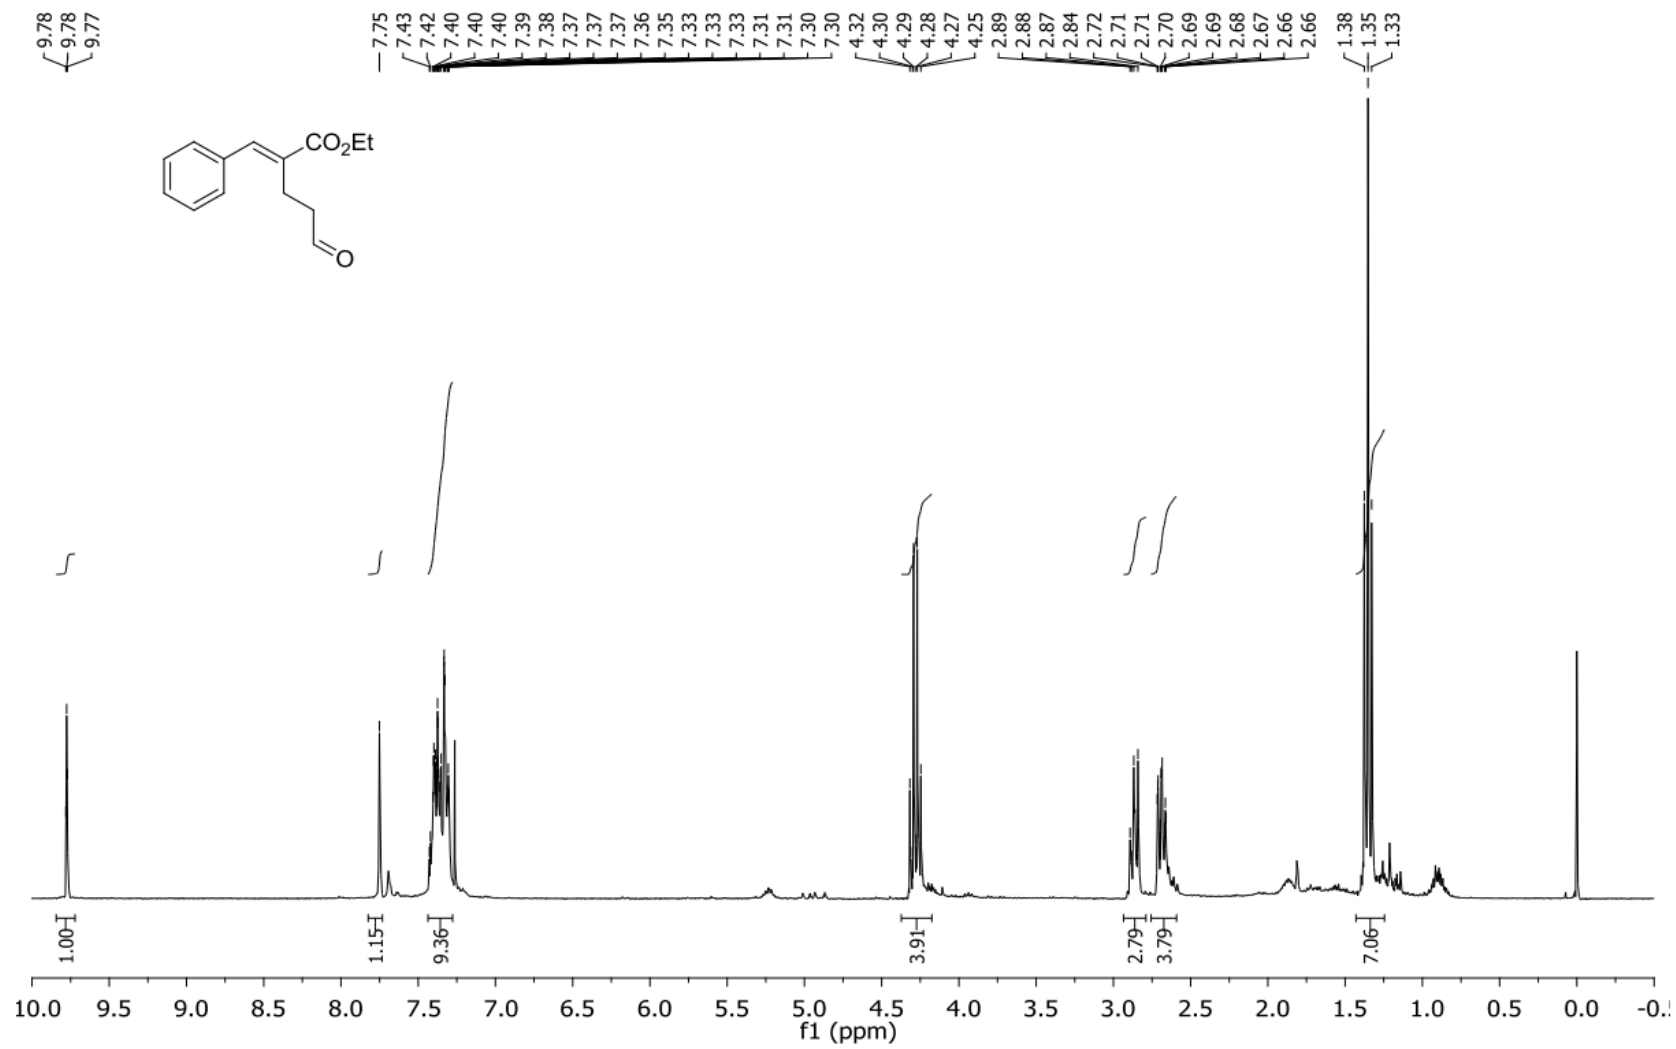

S2.12.  $^{13}\text{C}$  NMR (151 MHz) spectrum of **8** (*E*) **R** = Phenyl in  $\text{CDCl}_3$ .

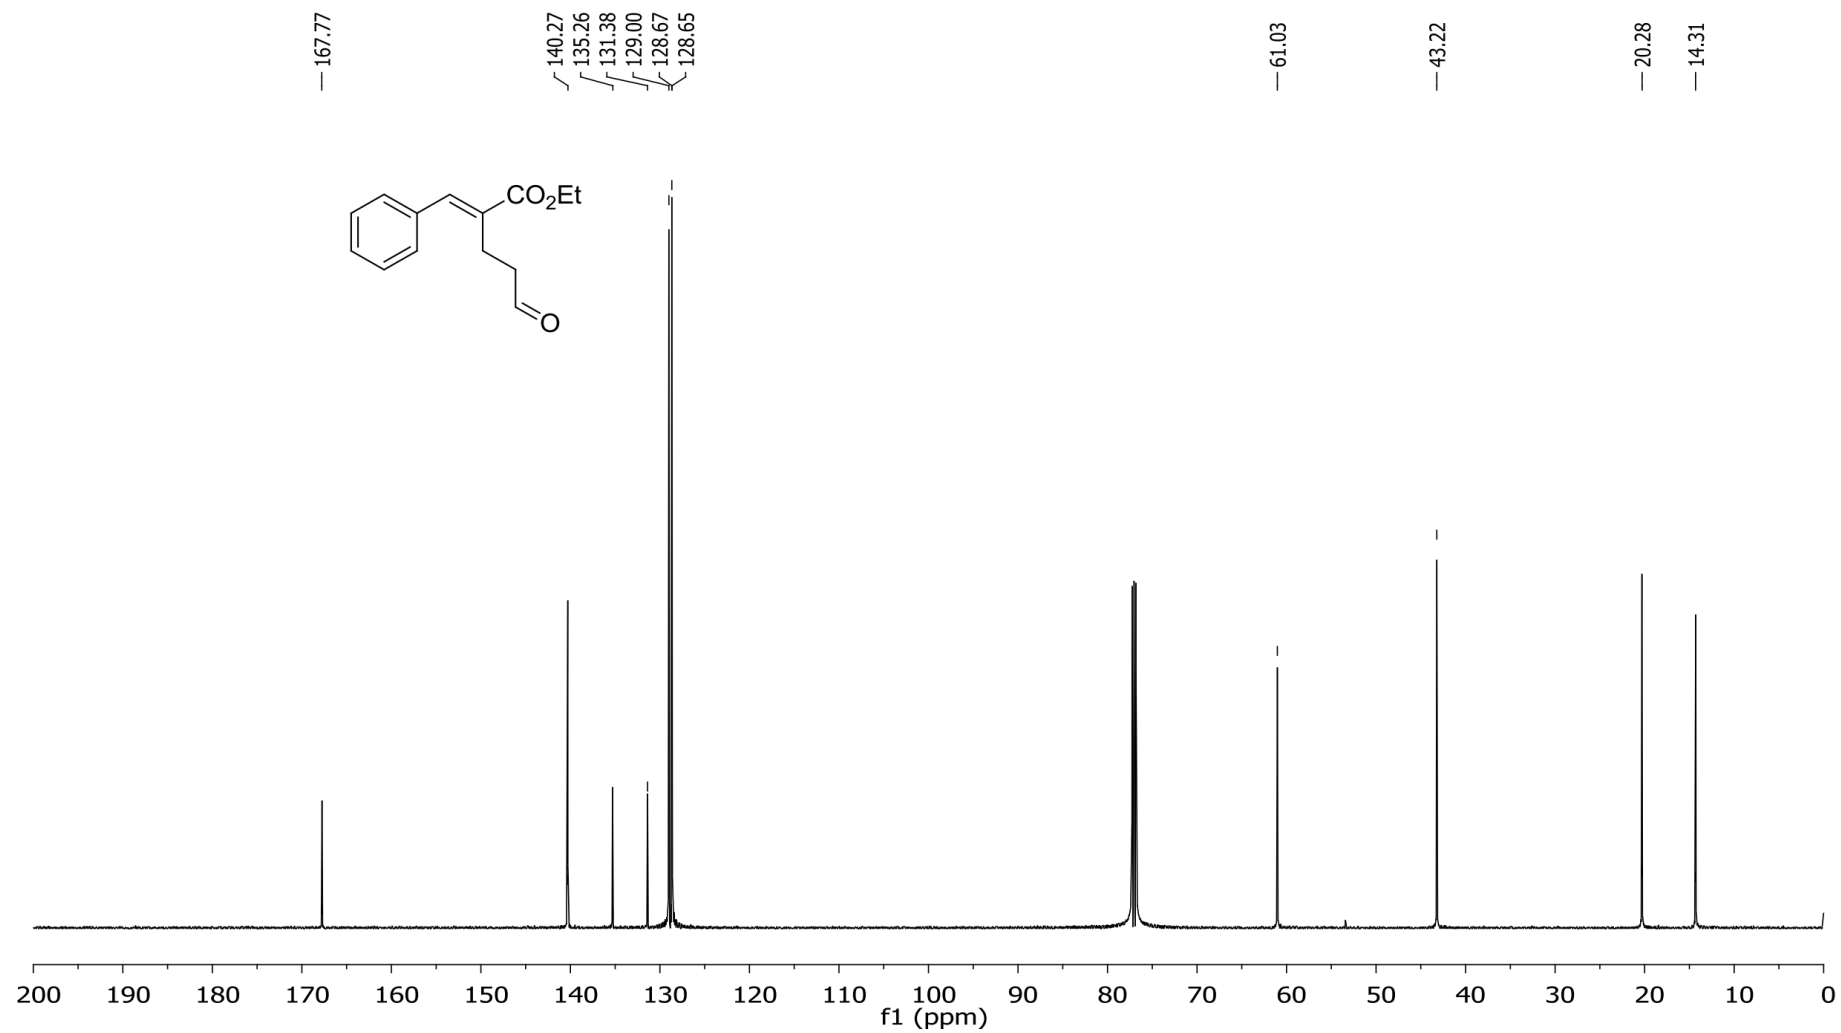

S2.13.  $^1\text{H}$  NMR (300 MHz) spectrum of **8** (*E*) **R** = 4-Cl-Phenyl in  $\text{CDCl}_3$ .

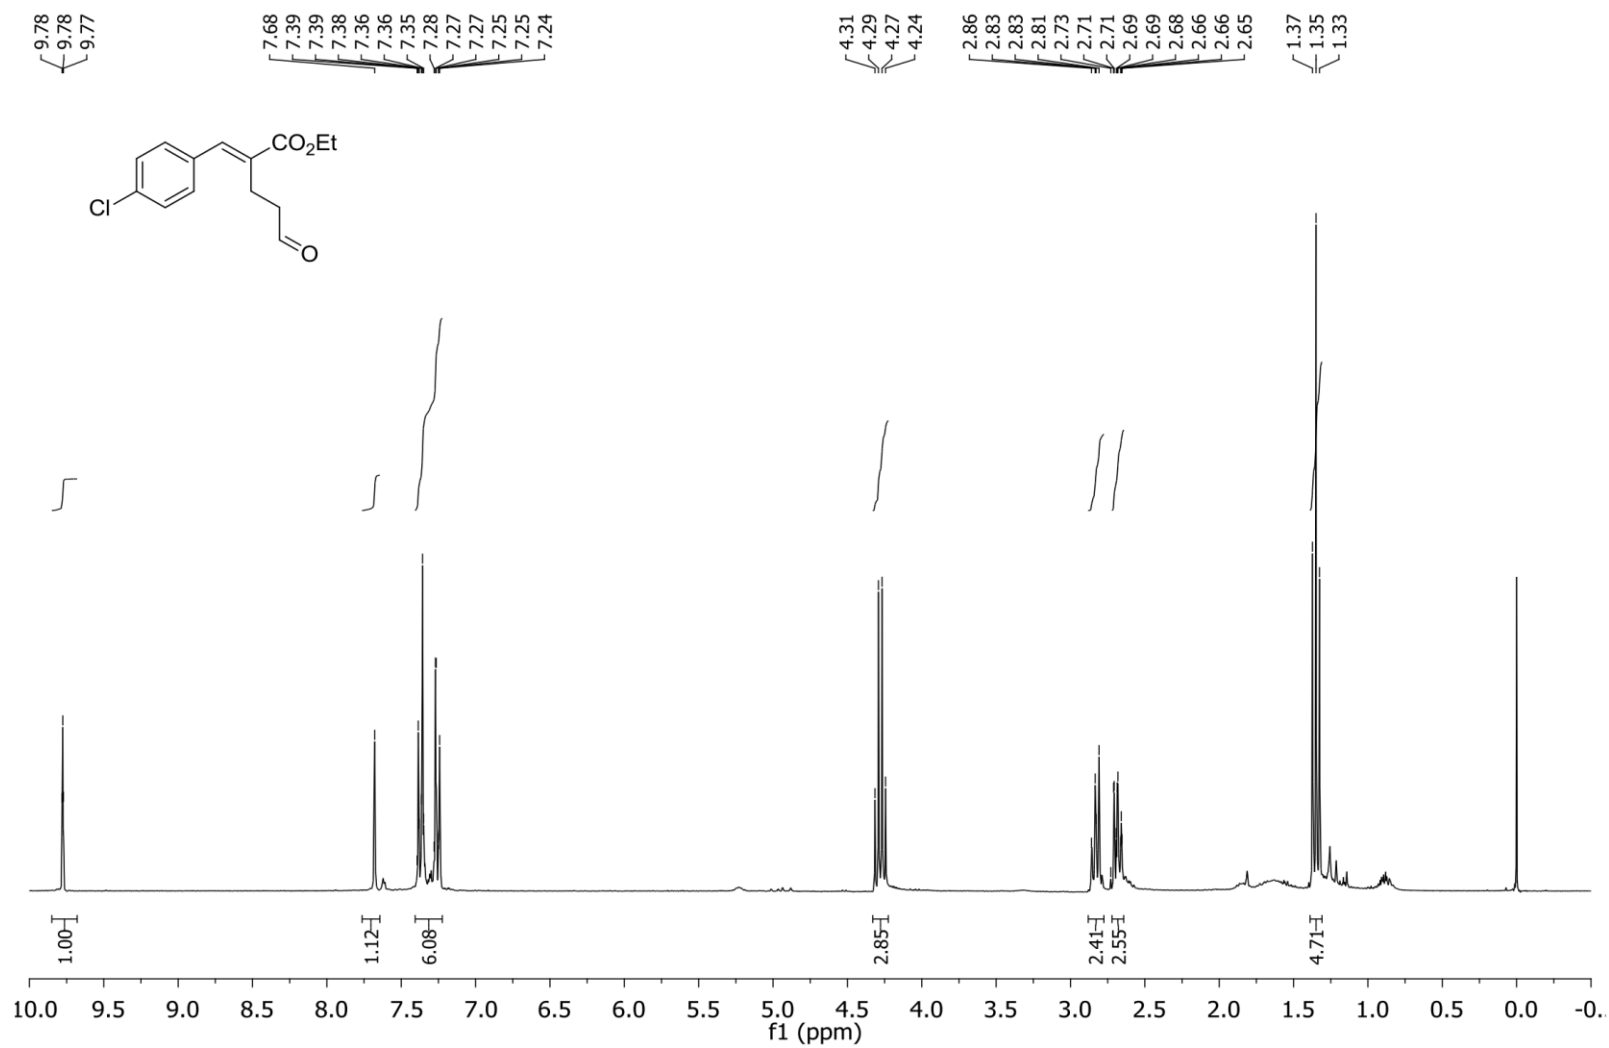

S2.14.  $^{13}\text{C}$  NMR (151 MHz) spectrum of **8** (*E*) **R** = 4-Cl-Phenyl in  $\text{CDCl}_3$ .

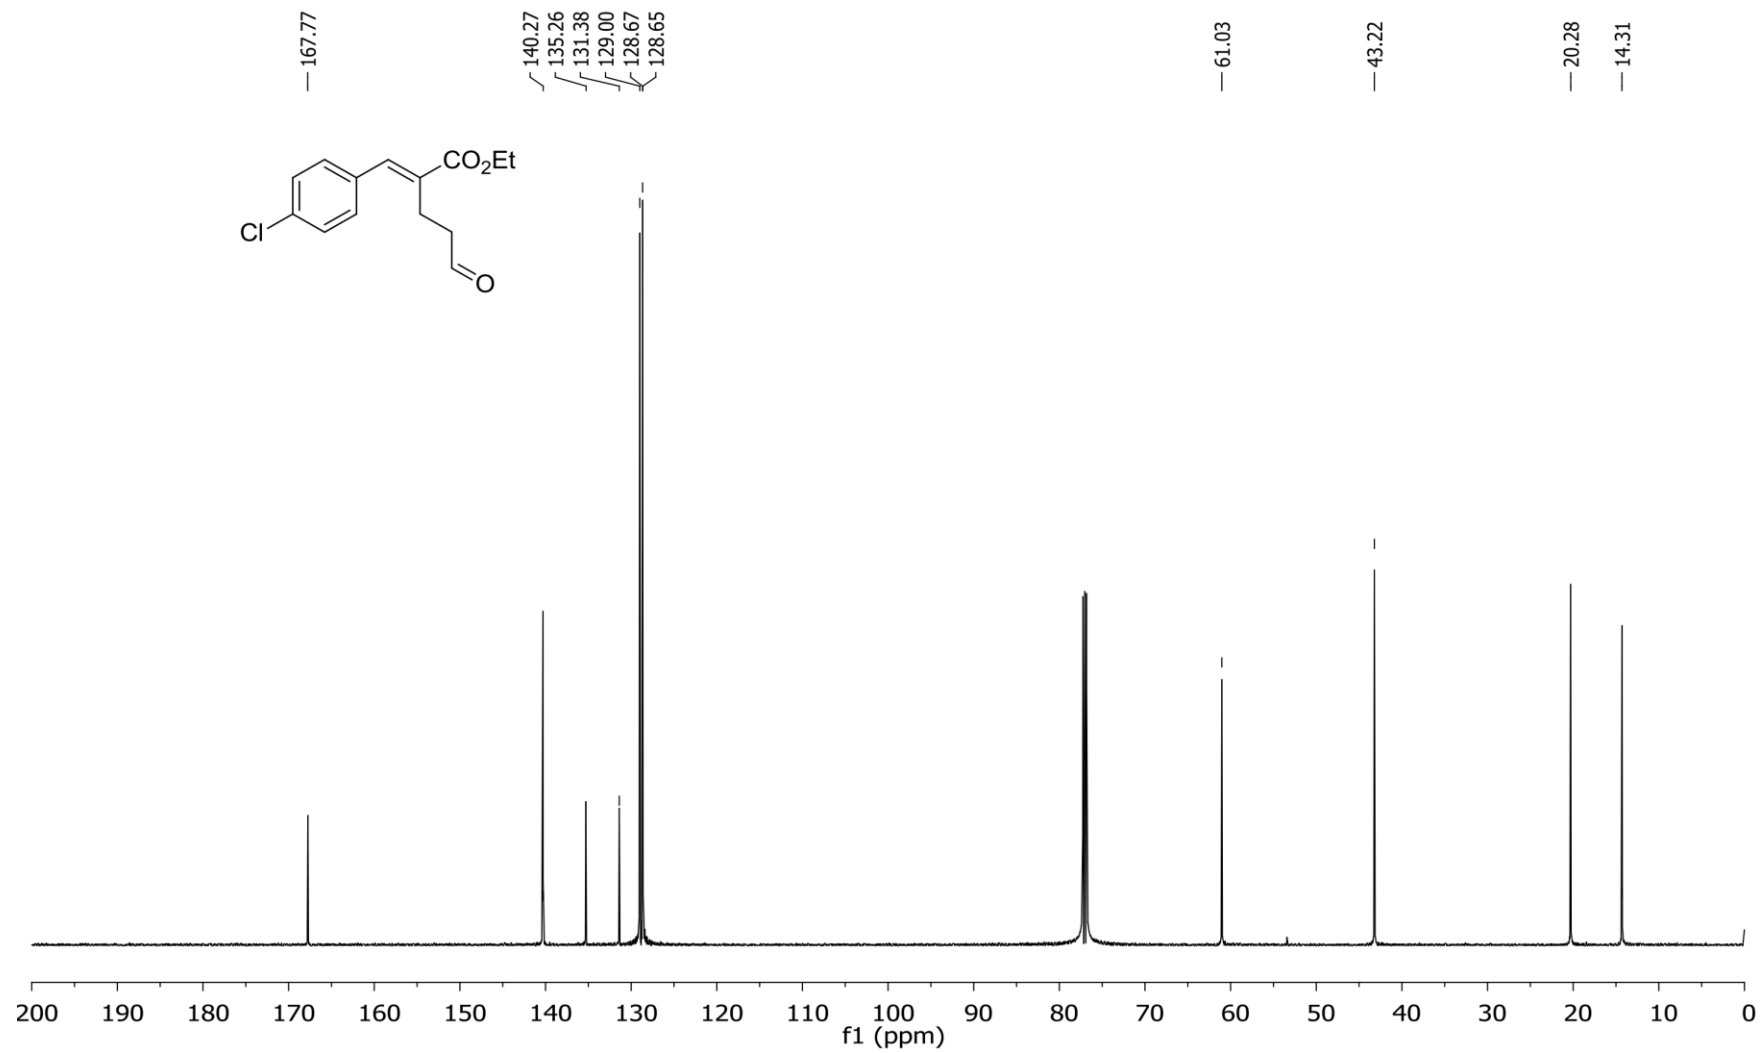

S2.15.  $^1\text{H}$  NMR (600 MHz) spectrum of **8** (*E*) **R** = 4-Br-Phenyl in  $\text{CDCl}_3$ .

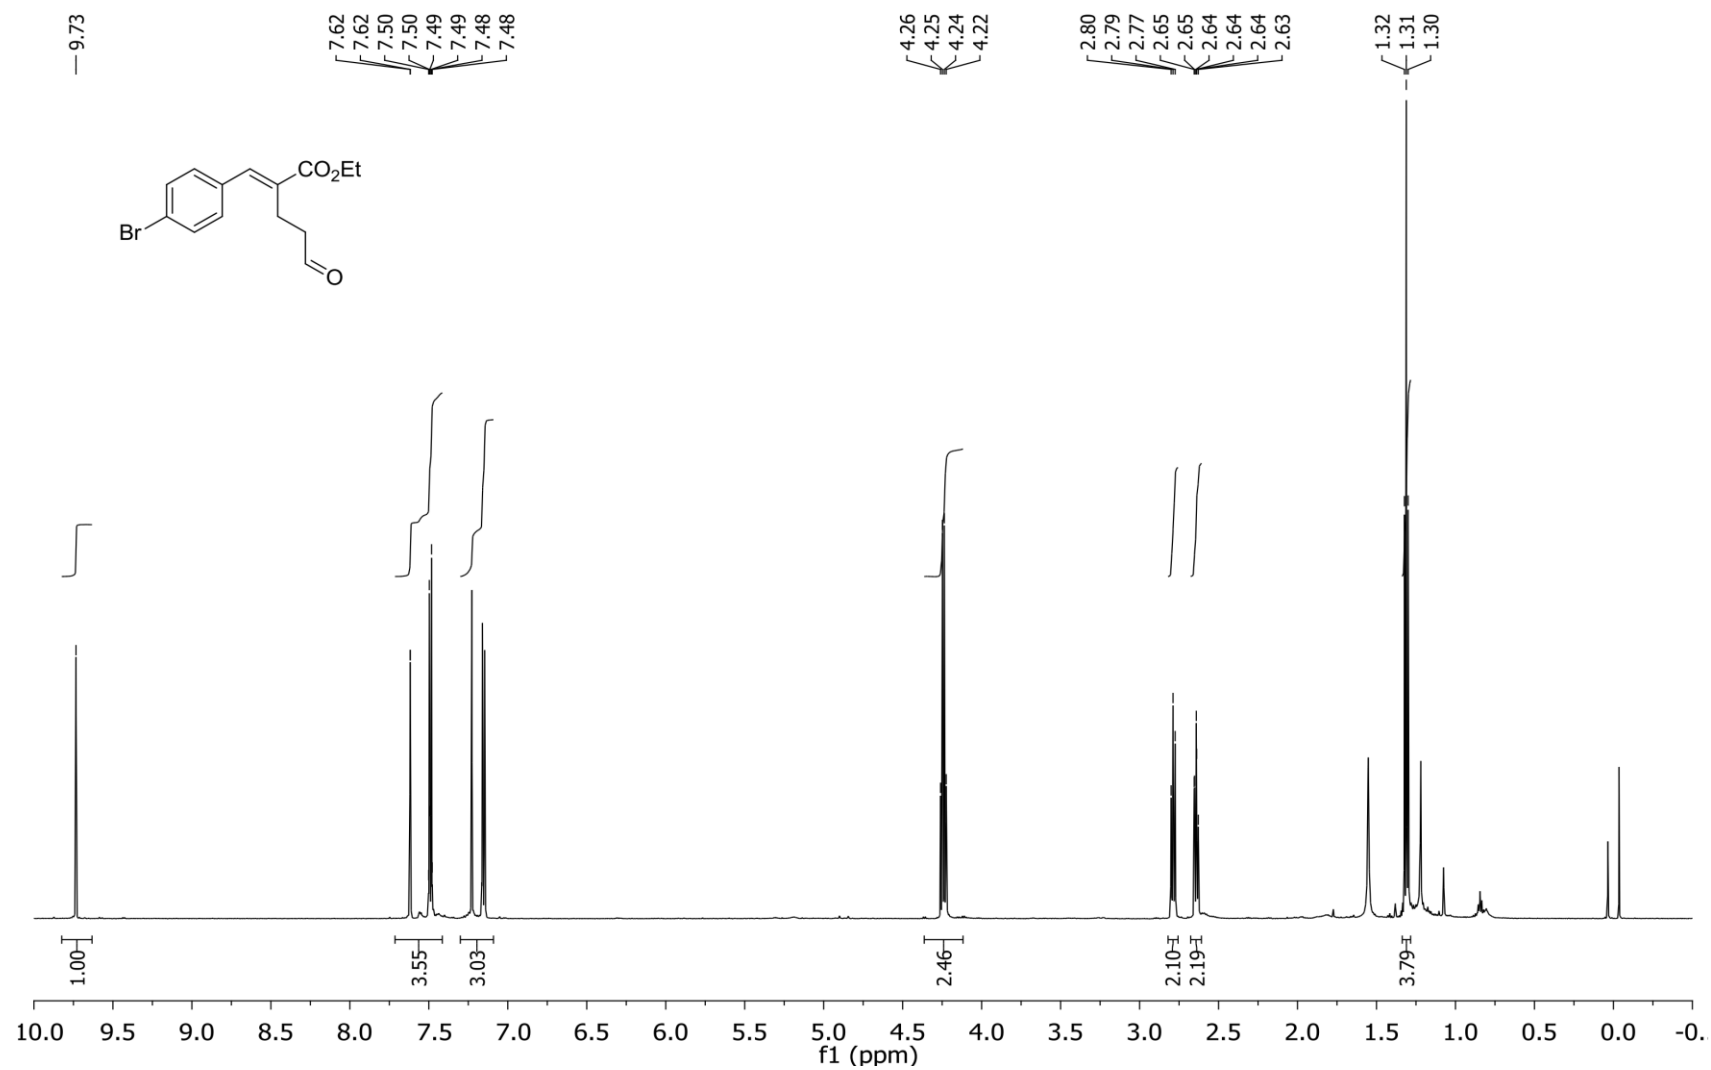

S2.16.  $^{13}\text{C}$  NMR (151 MHz) spectrum of **8** (*E*) **R** = 4-Br-Phenyl in  $\text{CDCl}_3$ .

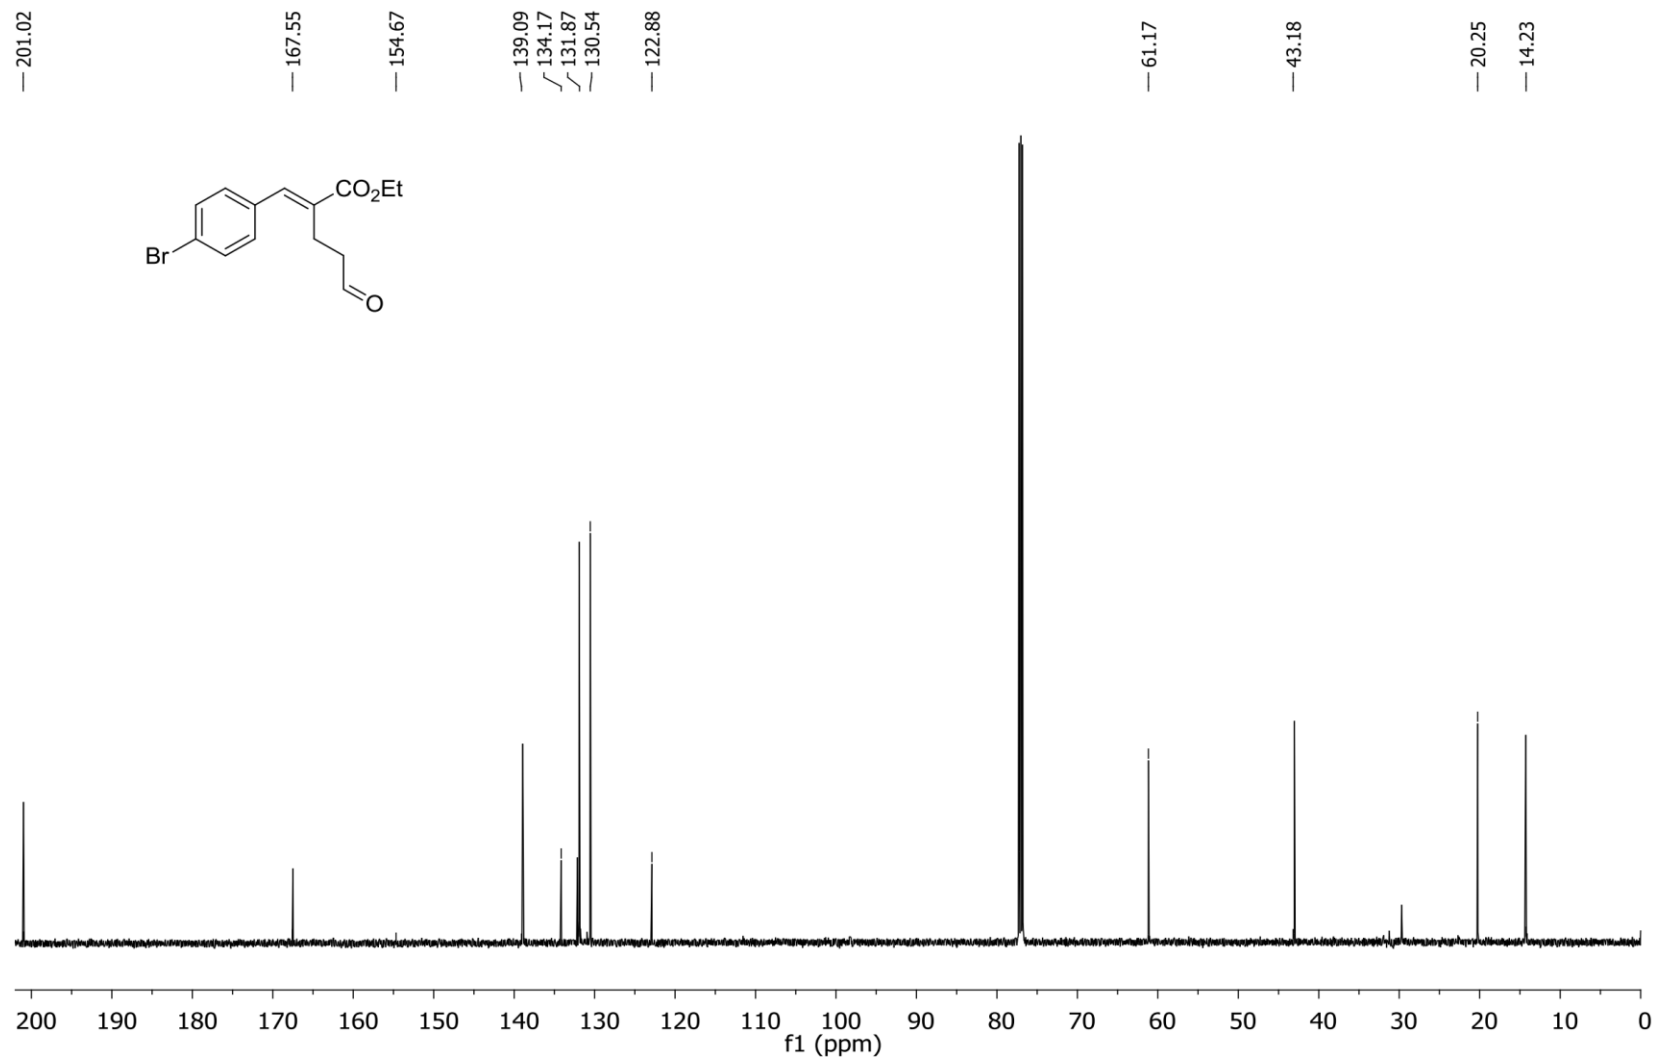

S2.17.  $^1\text{H}$  NMR (600 MHz) spectrum of **8** (*E*) **R** = 3,4-Methylenedioxyphenyl in  $\text{CDCl}_3$ .

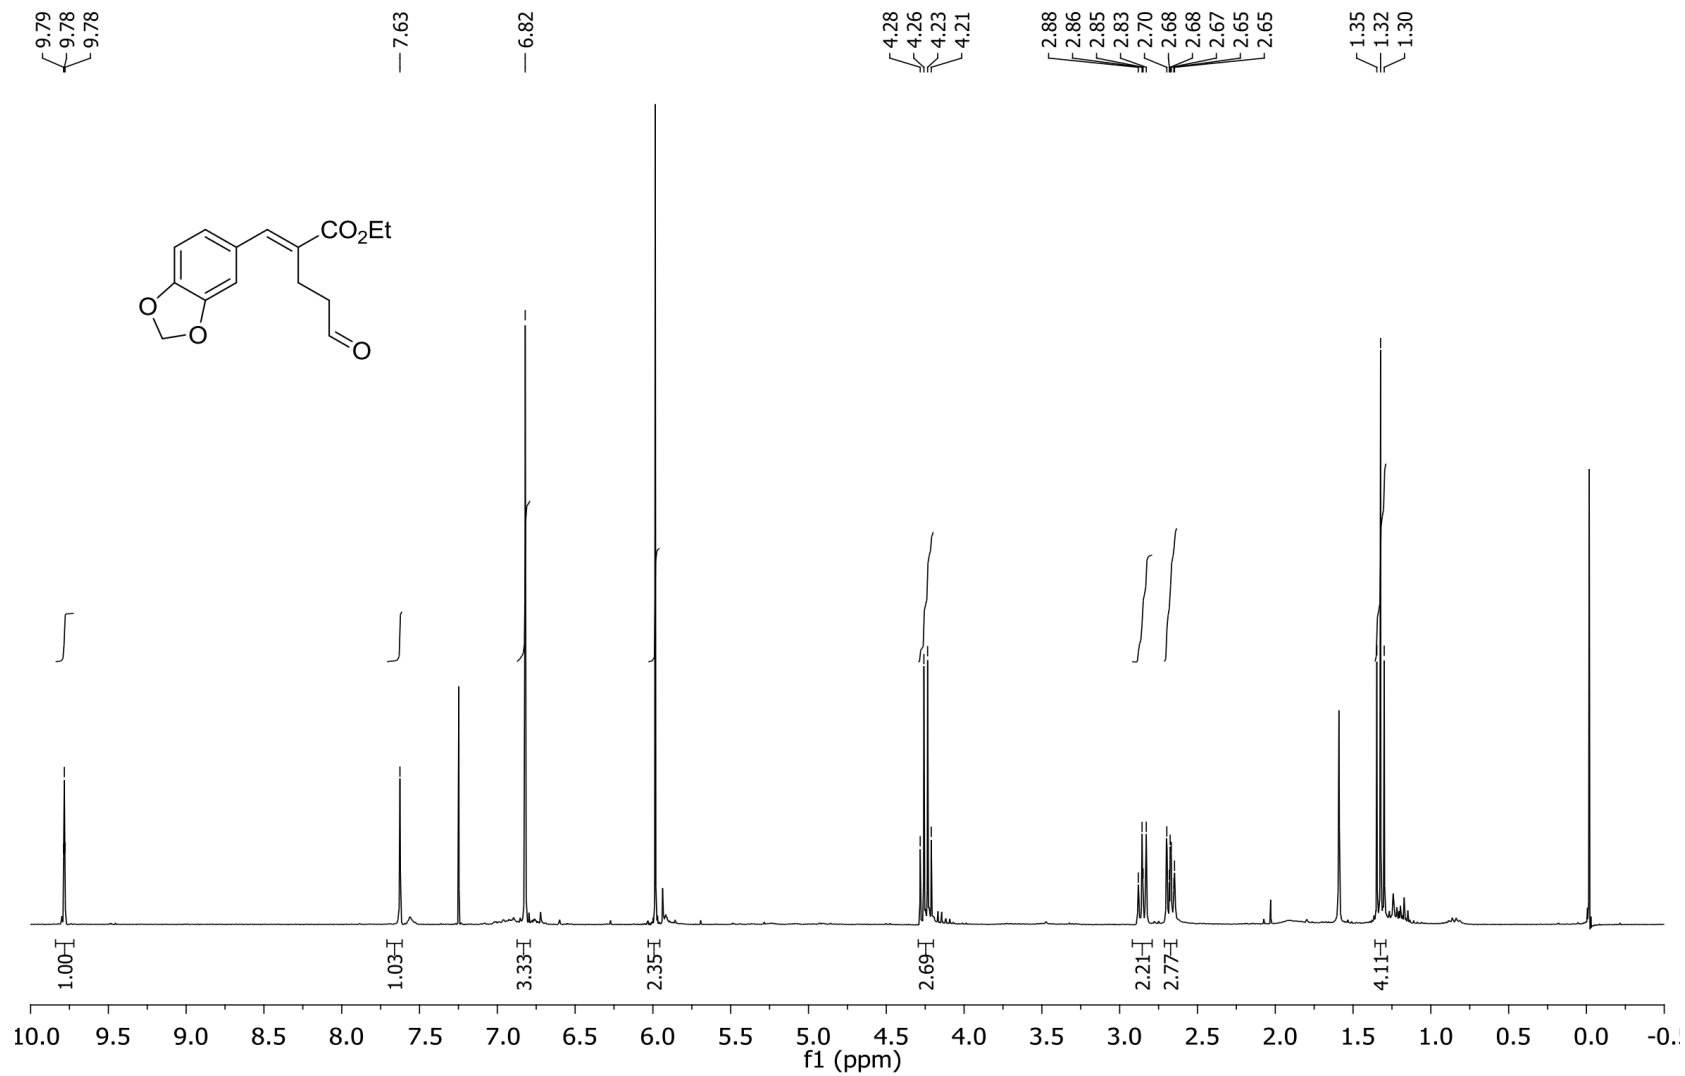



S2.18.  $^{13}\text{C}$  NMR (151 MHz) spectrum of **8** (*E*) **R** = 3,4-Methylenedioxyphenyl in  $\text{CDCl}_3$ .

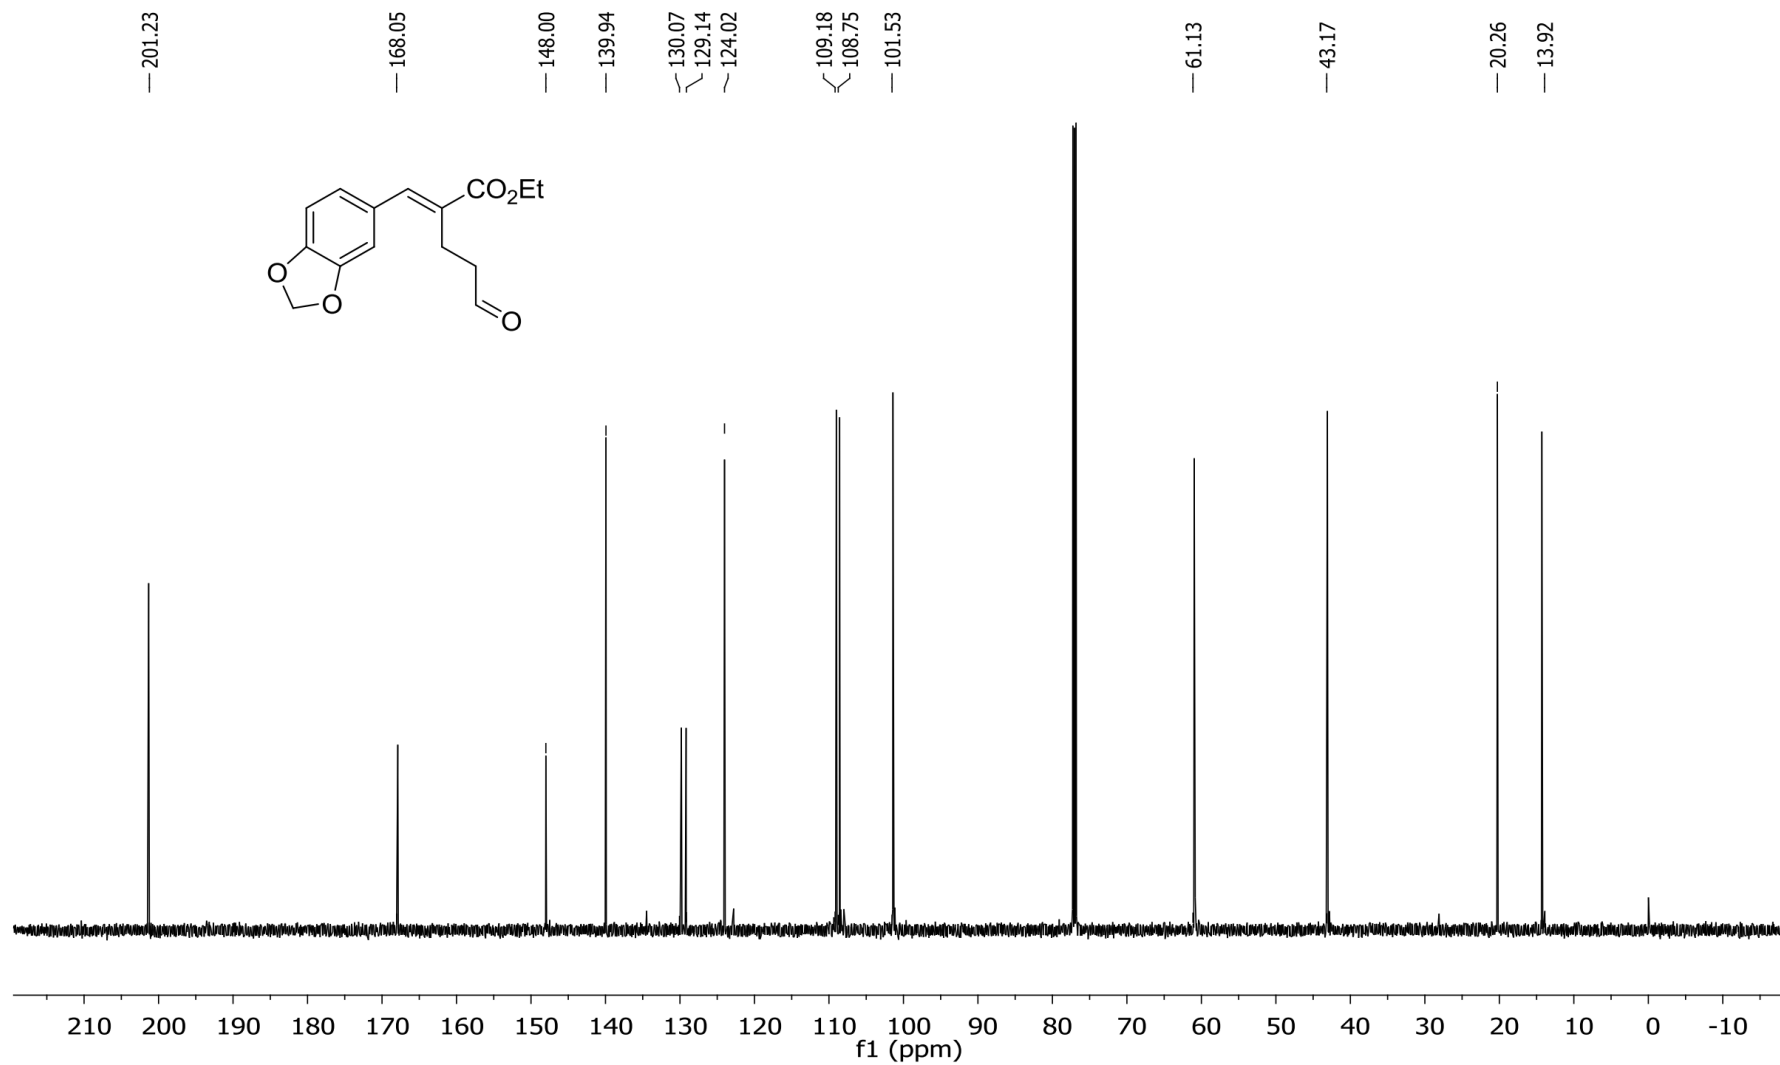

S2.19. <sup>1</sup>H NMR (600 MHz) spectrum of **8** (*E*) **R** = 4-NO<sub>2</sub>-Phenyl in CDCl<sub>3</sub>.

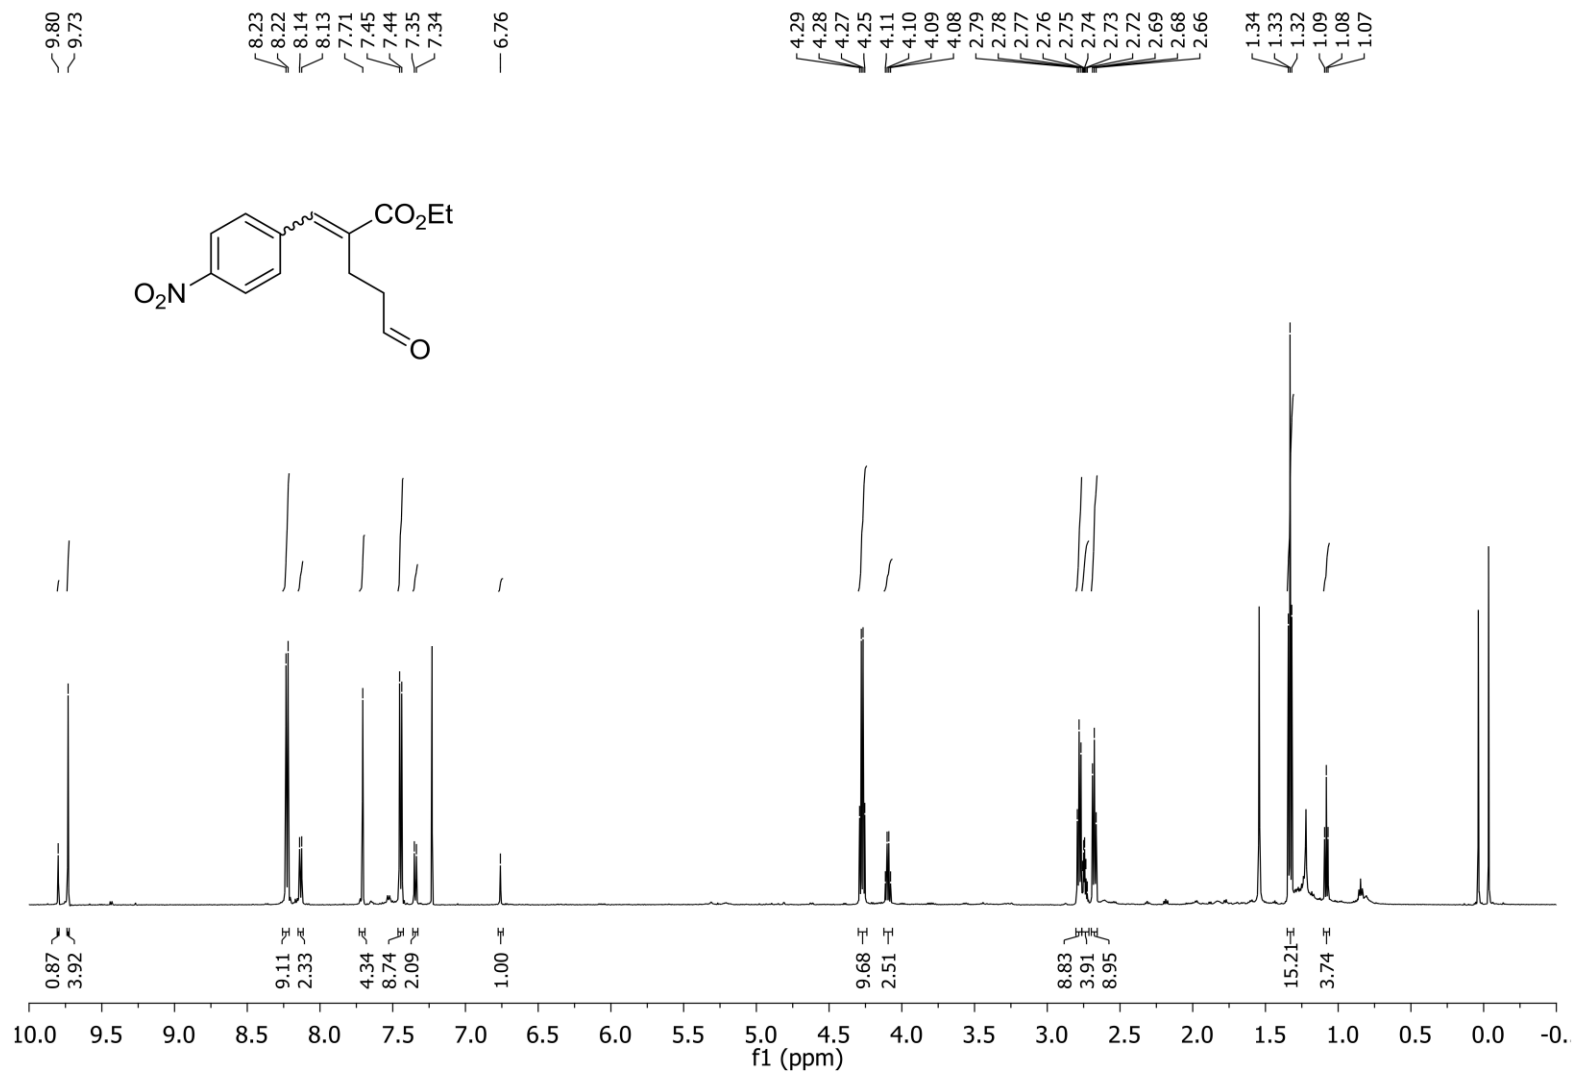

S2.20.  $^{13}\text{C}$  NMR (151 MHz) spectrum of **8** (*E*) **R** = 4-NO<sub>2</sub>-Phenyl in CDCl<sub>3</sub>.

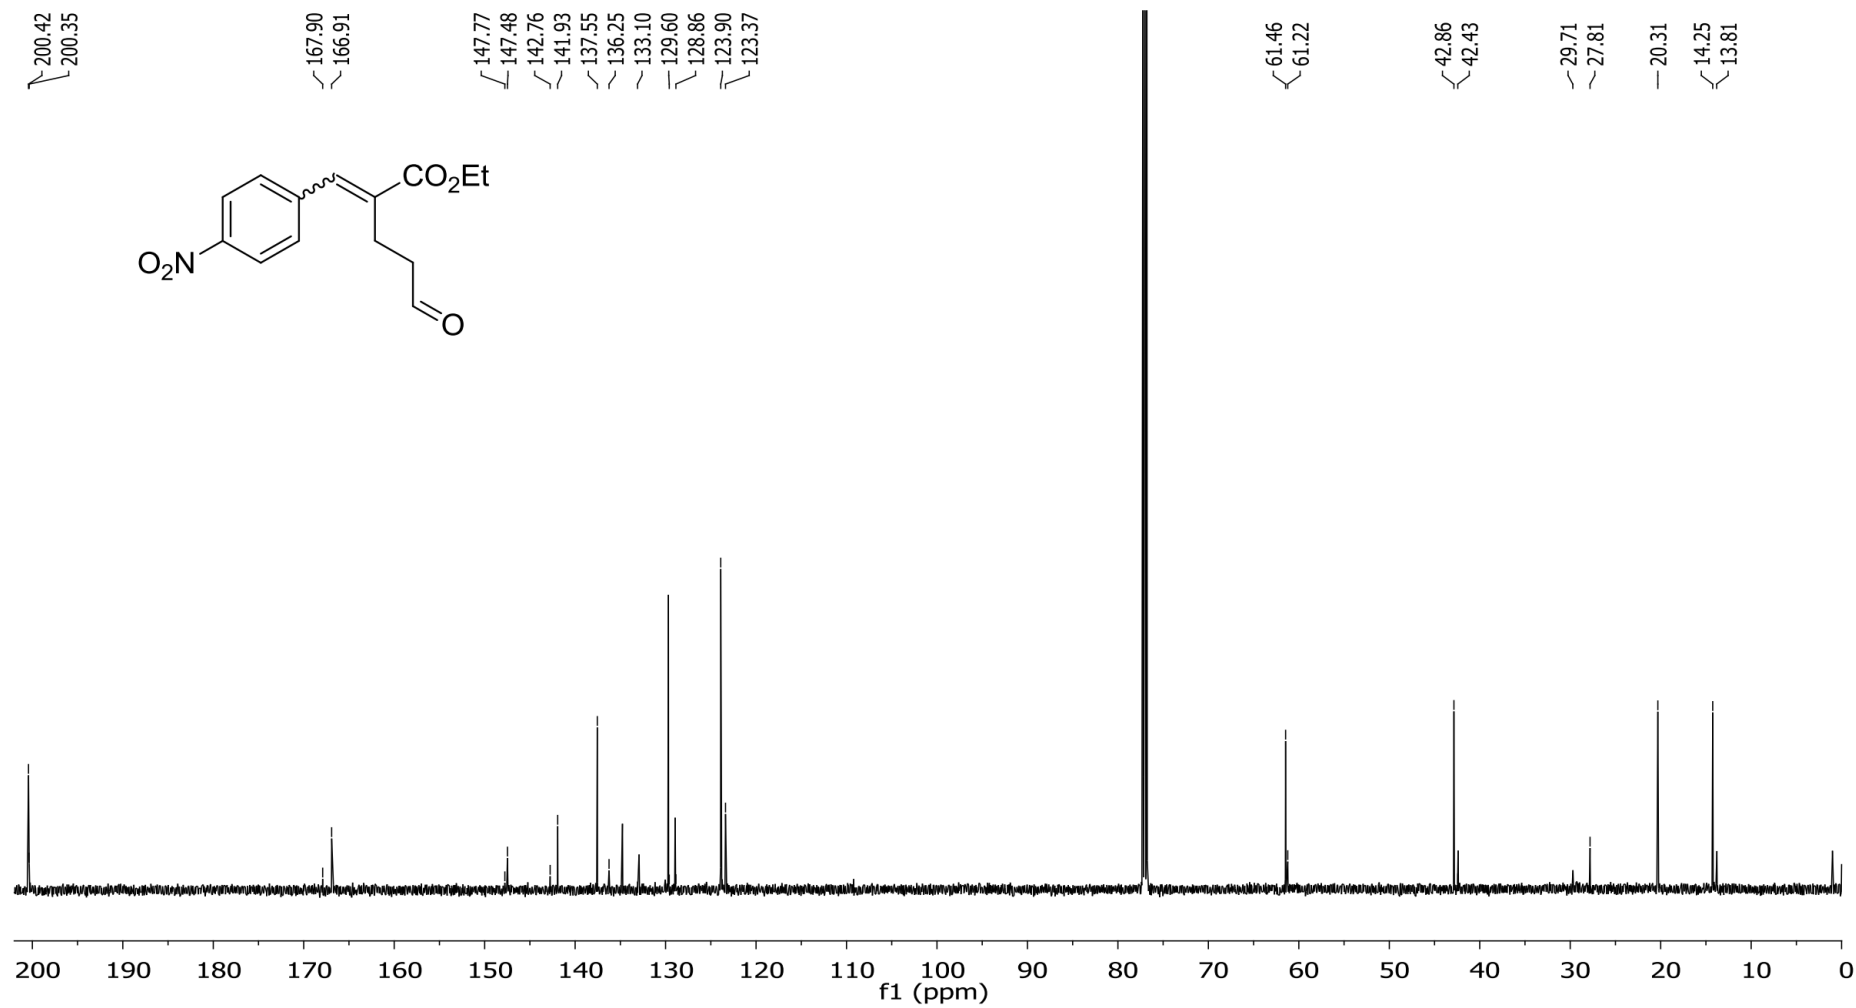

S2.21.  $^1\text{H}$  NMR (600 MHz) spectrum of **10E** in  $\text{CDCl}_3$ .

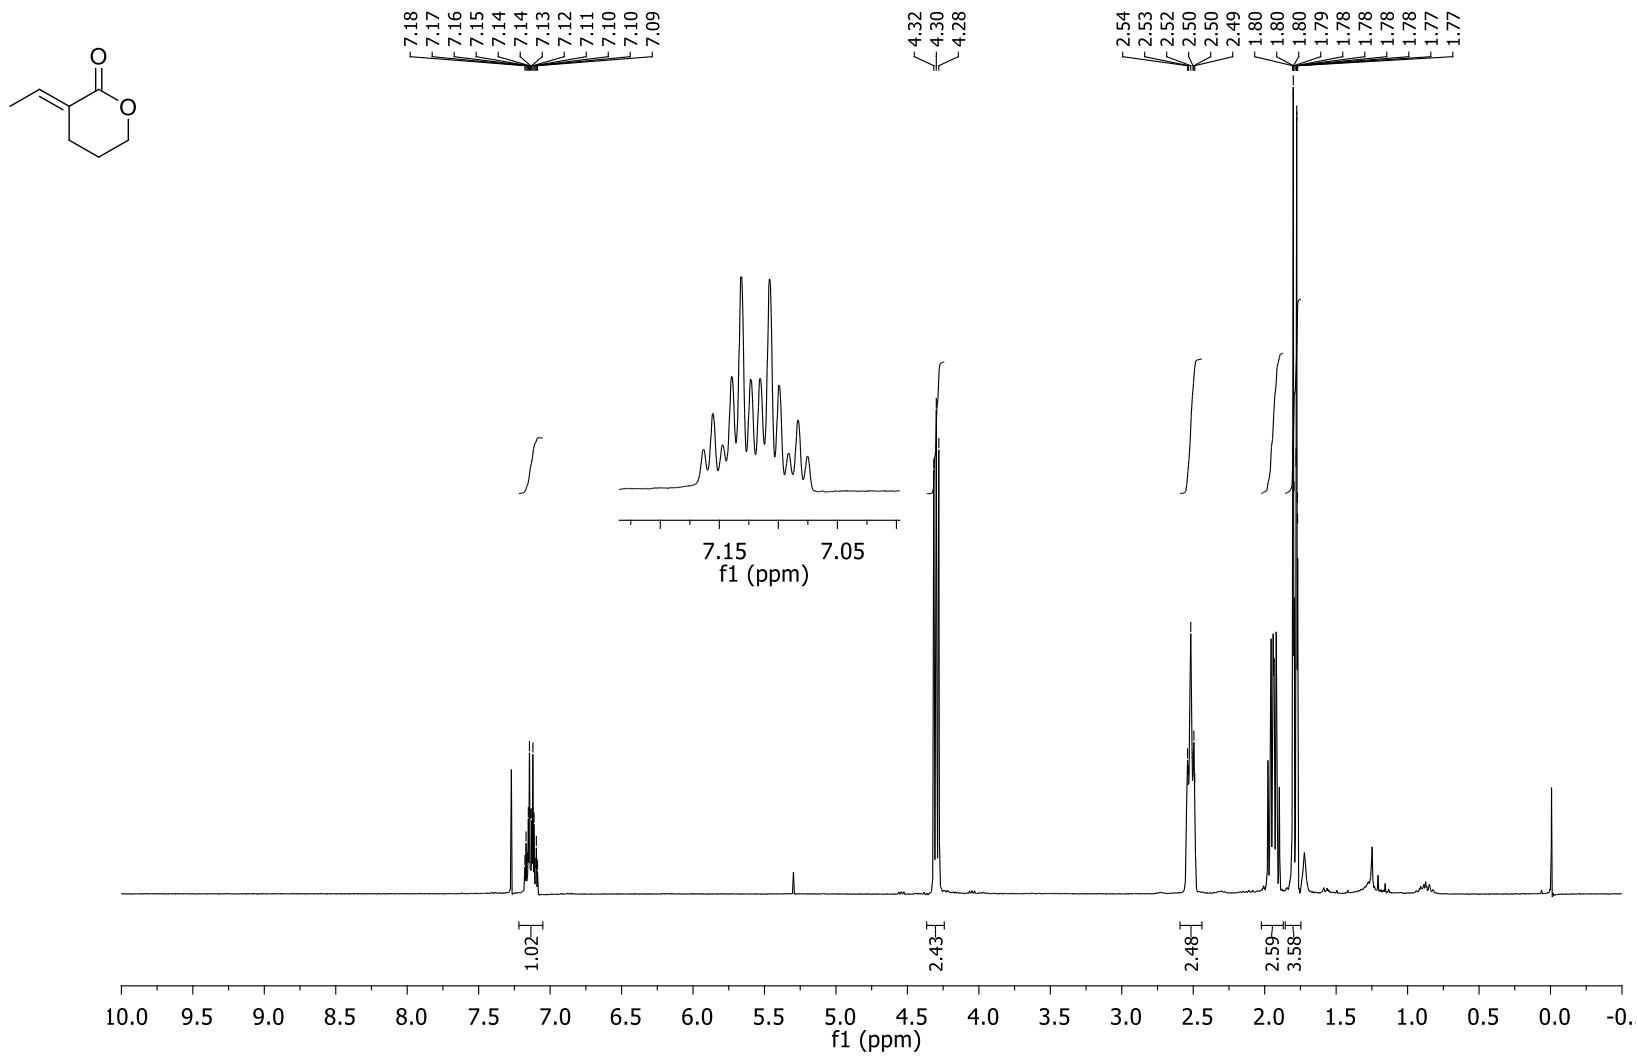

S2.22.  $^{13}\text{C}$  NMR (151 MHz) spectrum of **10E** in  $\text{CDCl}_3$ .

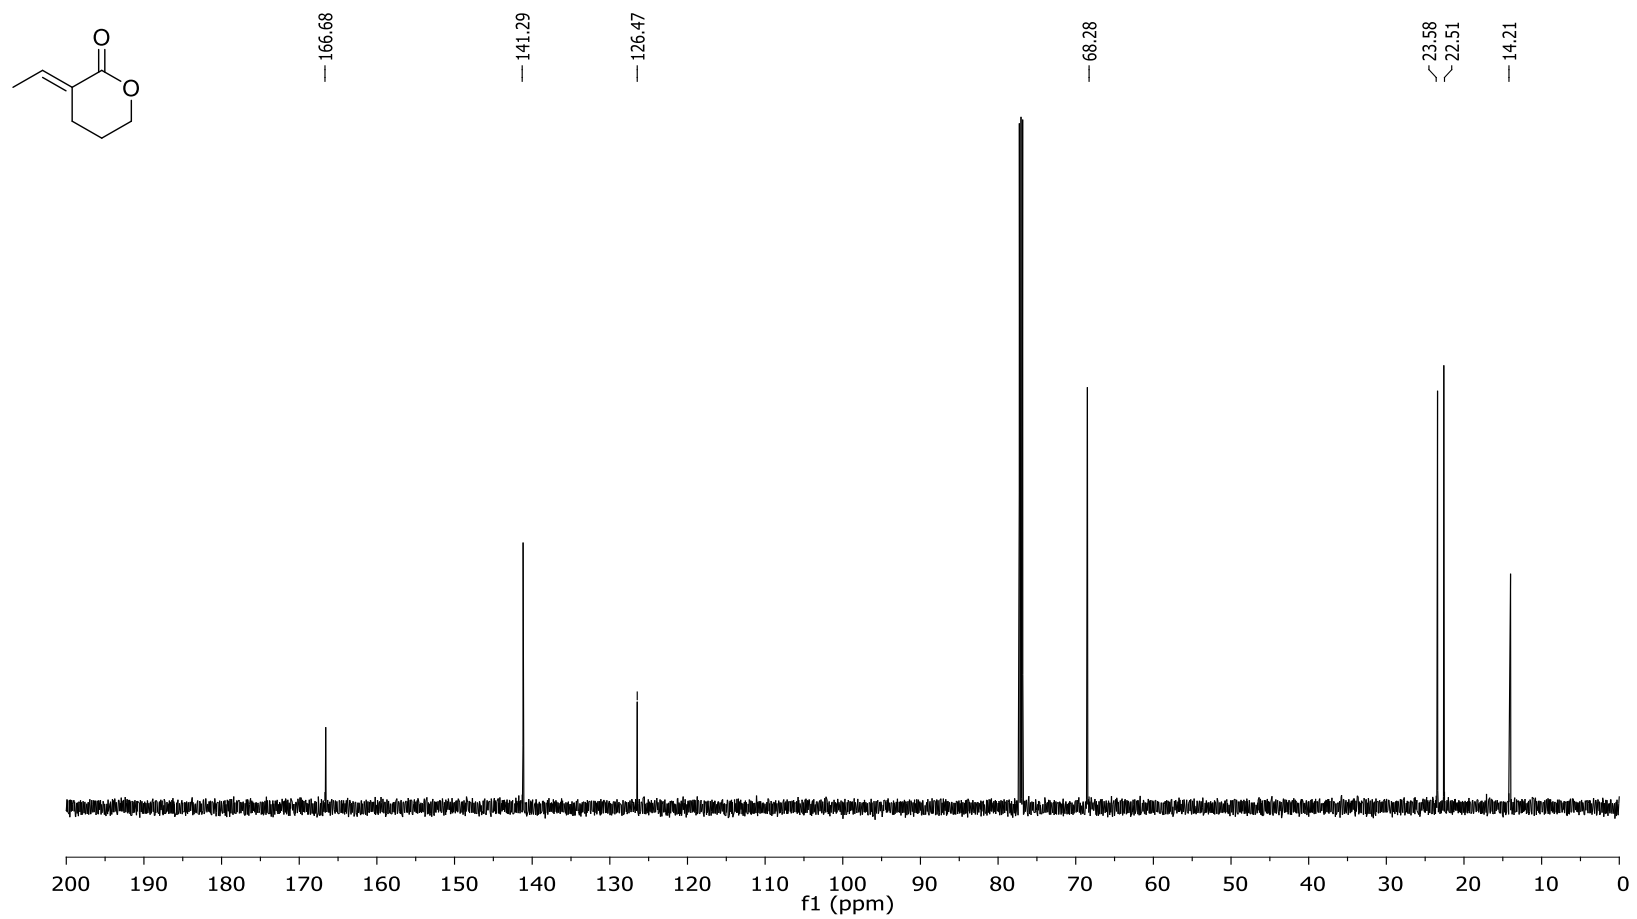

S2.23.  $^1\text{H}$  NMR (300 MHz) spectrum of **10Z** in  $\text{CDCl}_3$ .

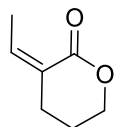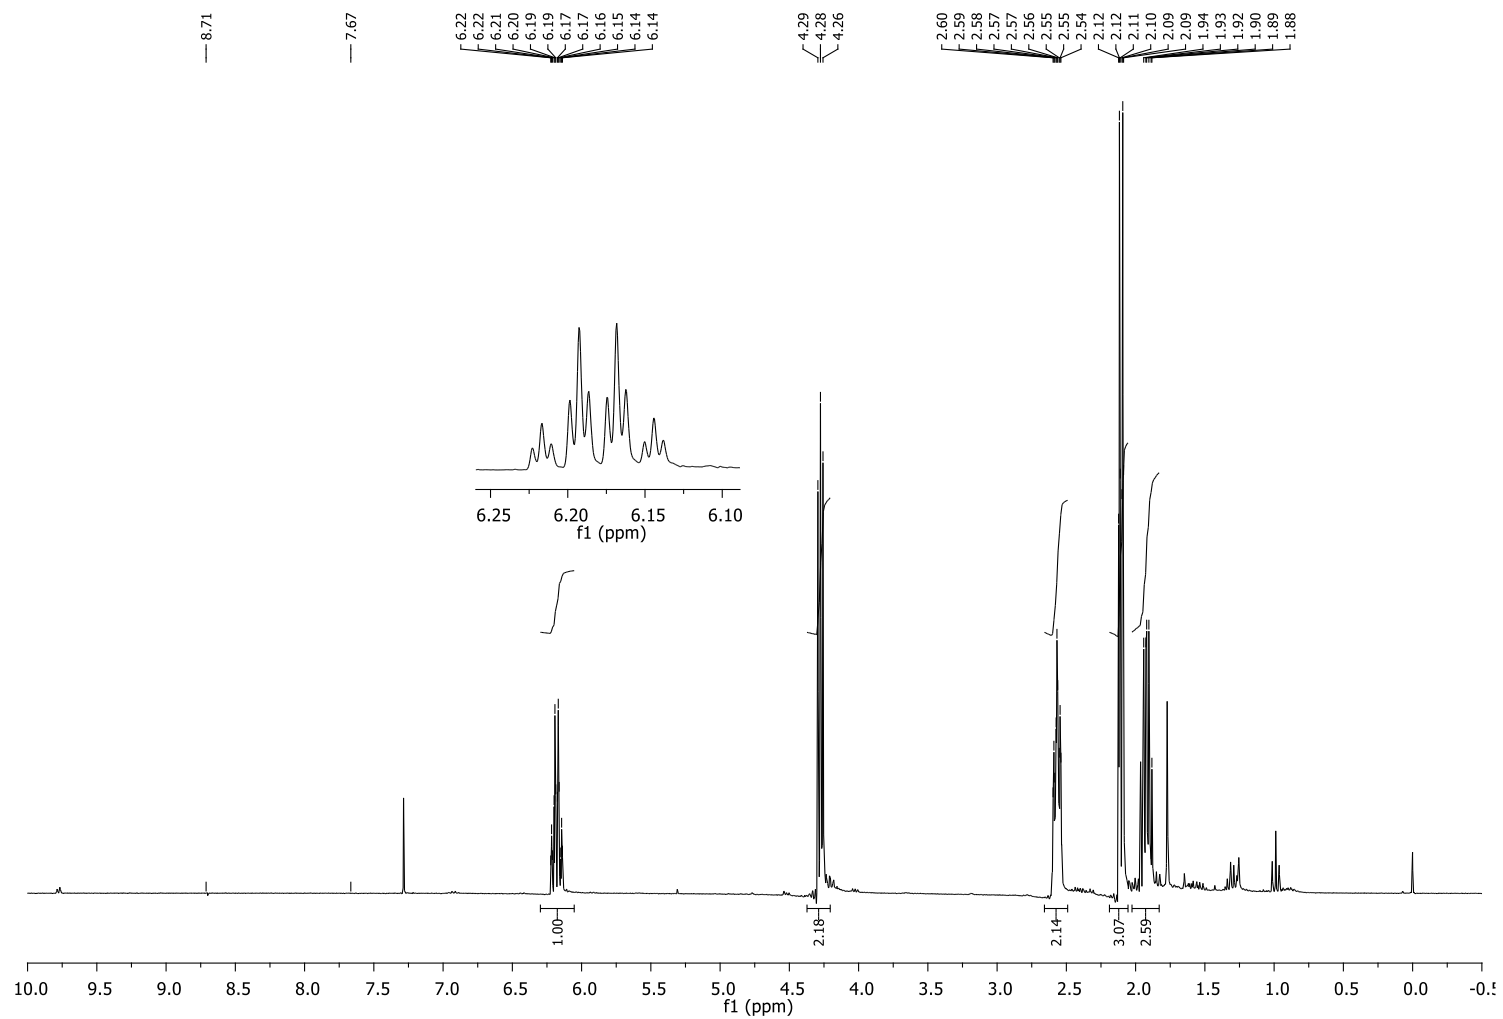

S2.24.  $^{13}\text{C}$  NMR (75 MHz) spectrum of **10Z** in  $\text{CDCl}_3$ .

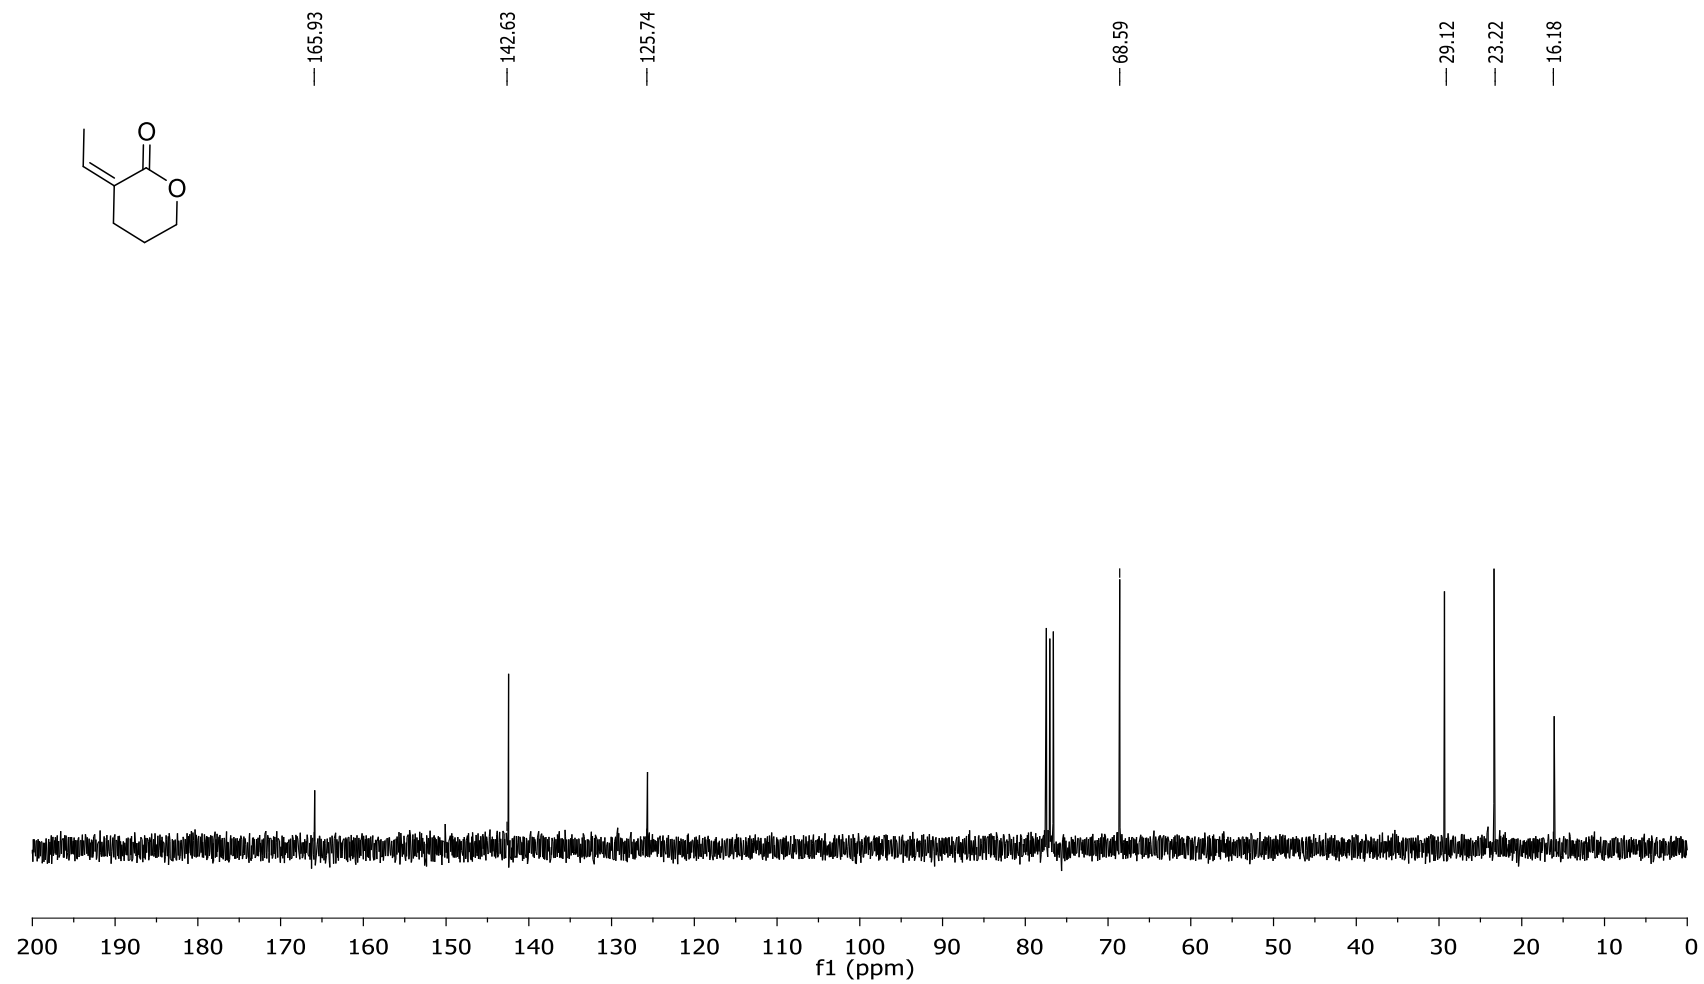

S2.25.  $^1\text{H}$  NMR (600 MHz) spectrum of **11E** in  $\text{CDCl}_3$ .

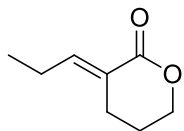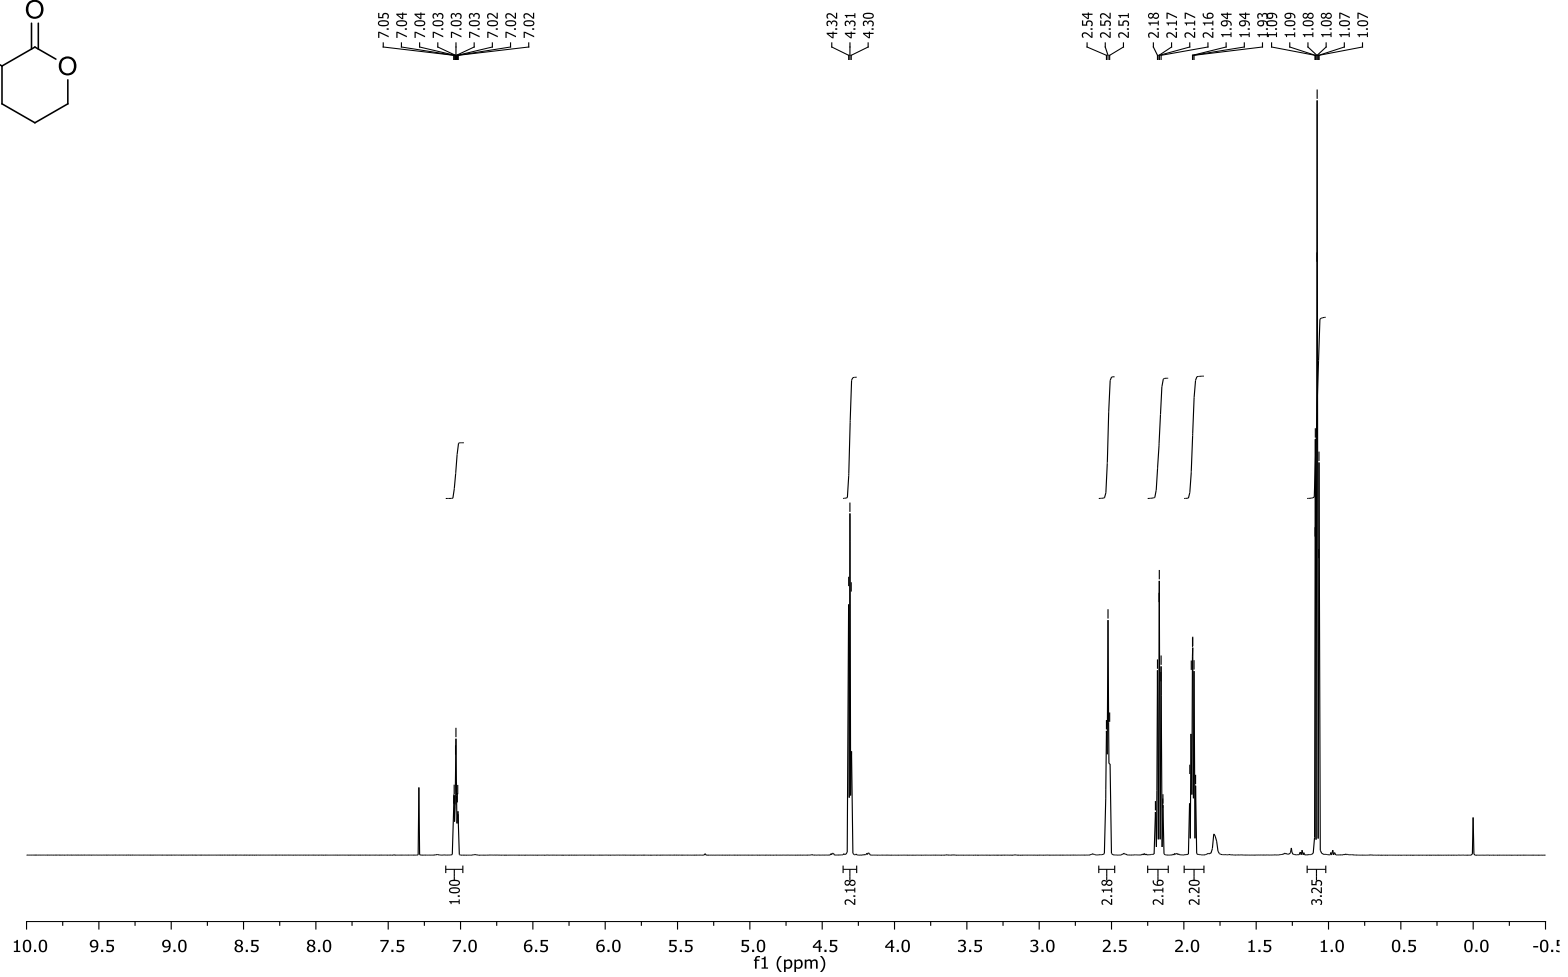



S2.26.  $^{13}\text{C}$  NMR (75 MHz) spectrum of **11E** in  $\text{CDCl}_3$ .

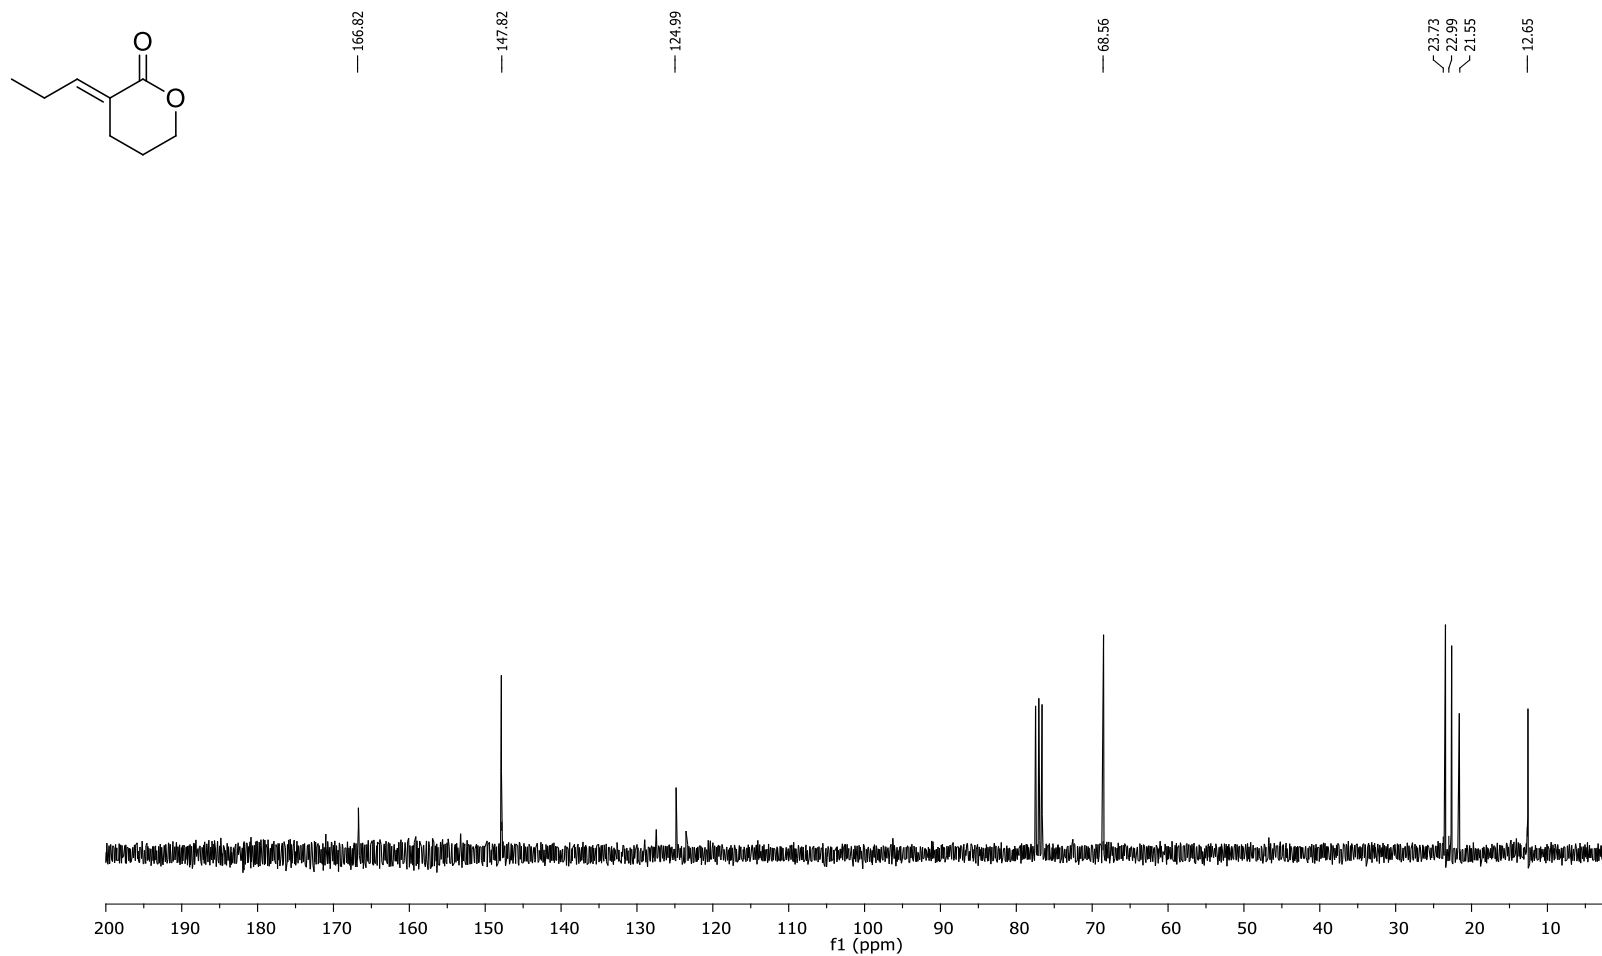

S2.27.  $^1\text{H}$  NMR (300 MHz) spectrum of **11Z** in  $\text{CDCl}_3$ .

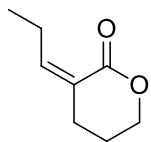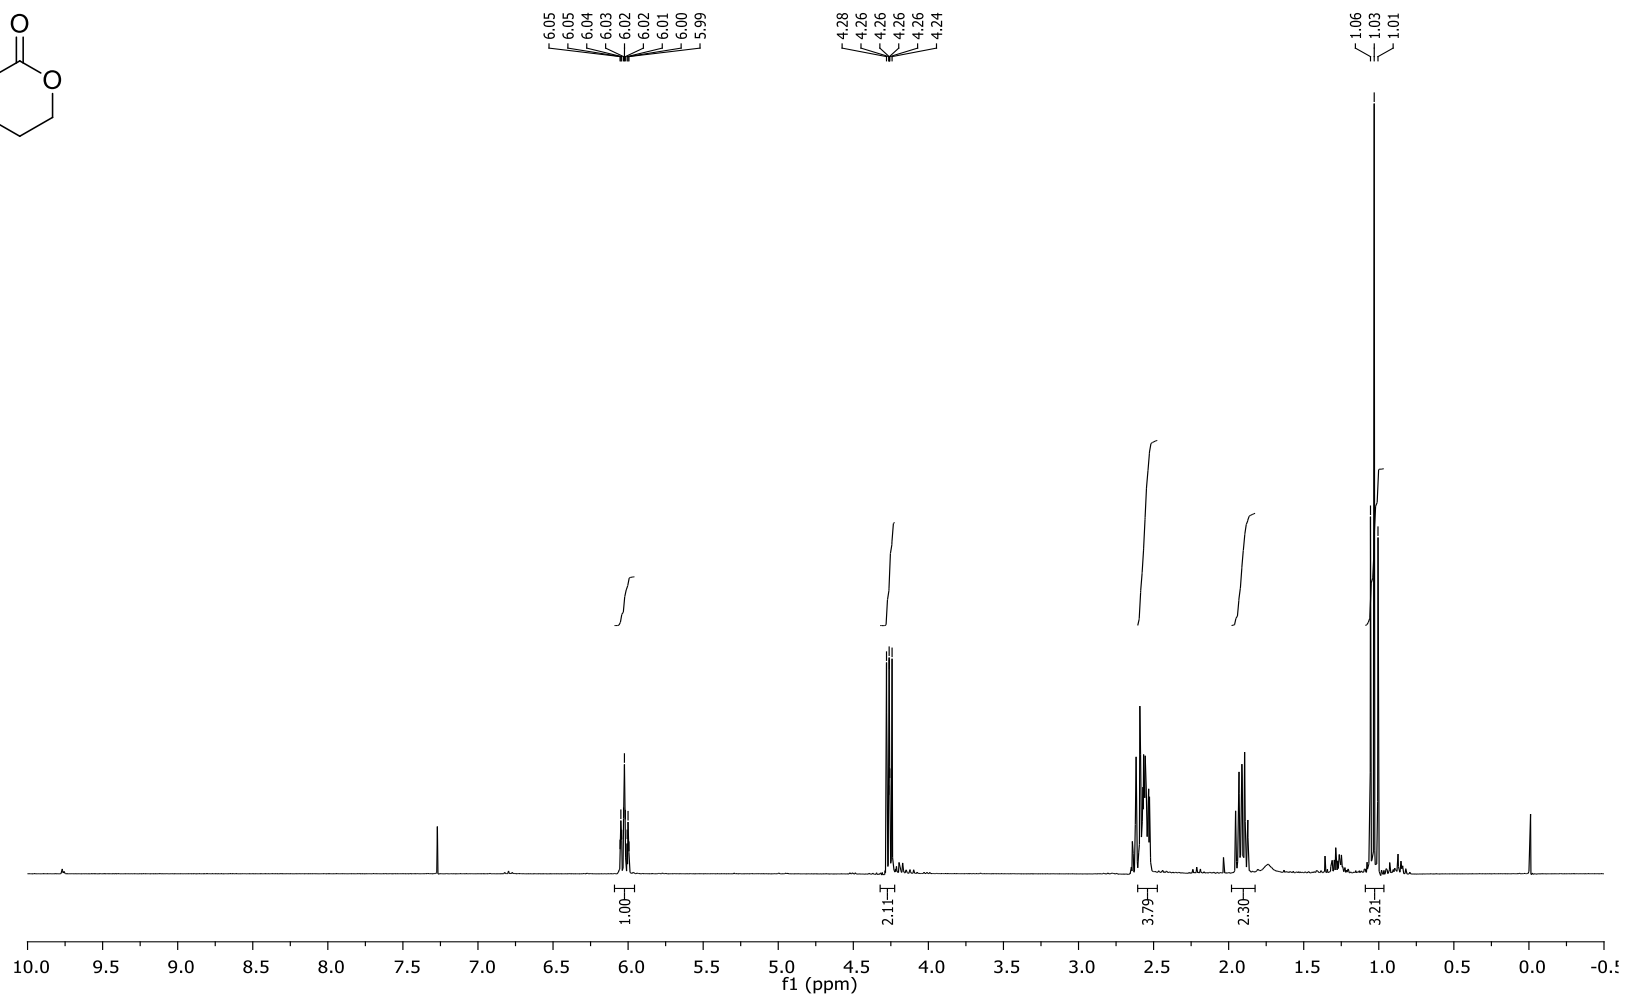

S2.28.  $^{13}\text{C}$  NMR (75 MHz) spectrum of **11Z** in  $\text{CDCl}_3$ .

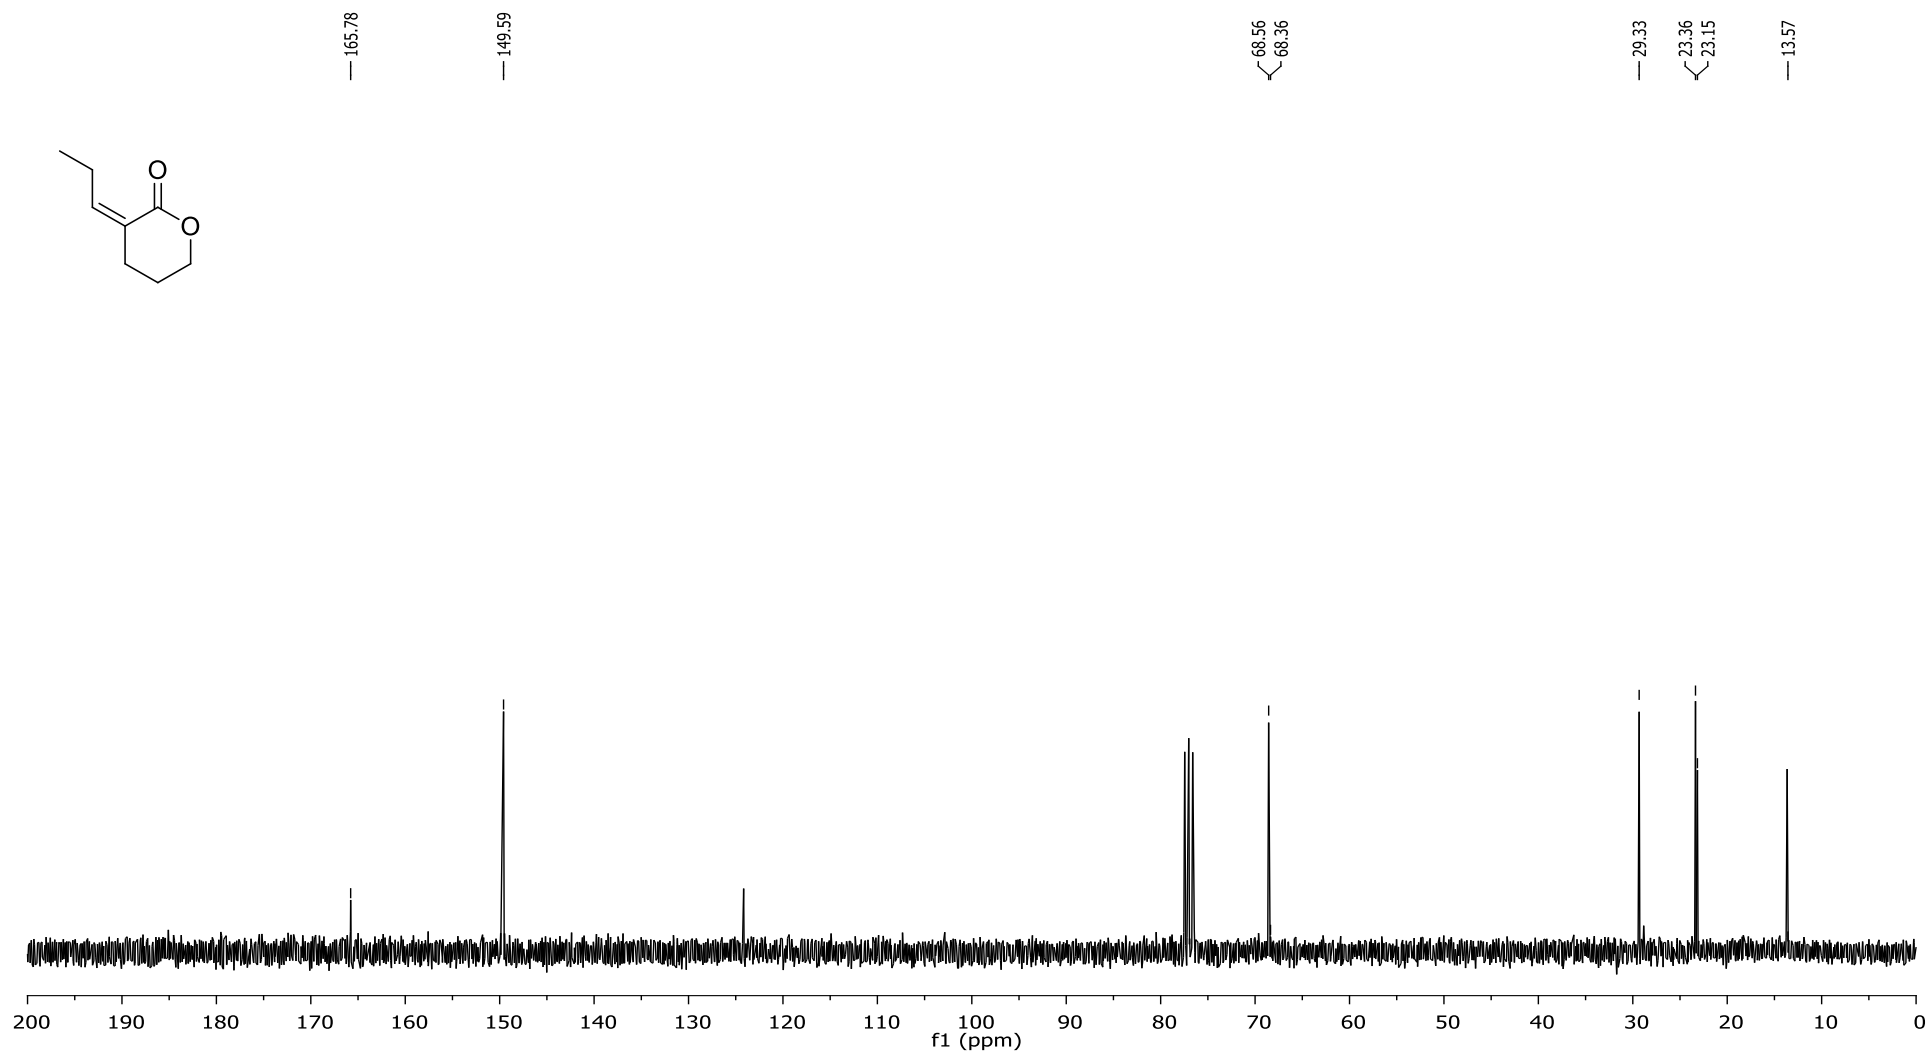

S2.29.  $^1\text{H}$  NMR (600 MHz) spectrum of **12E** in  $\text{CDCl}_3$ .

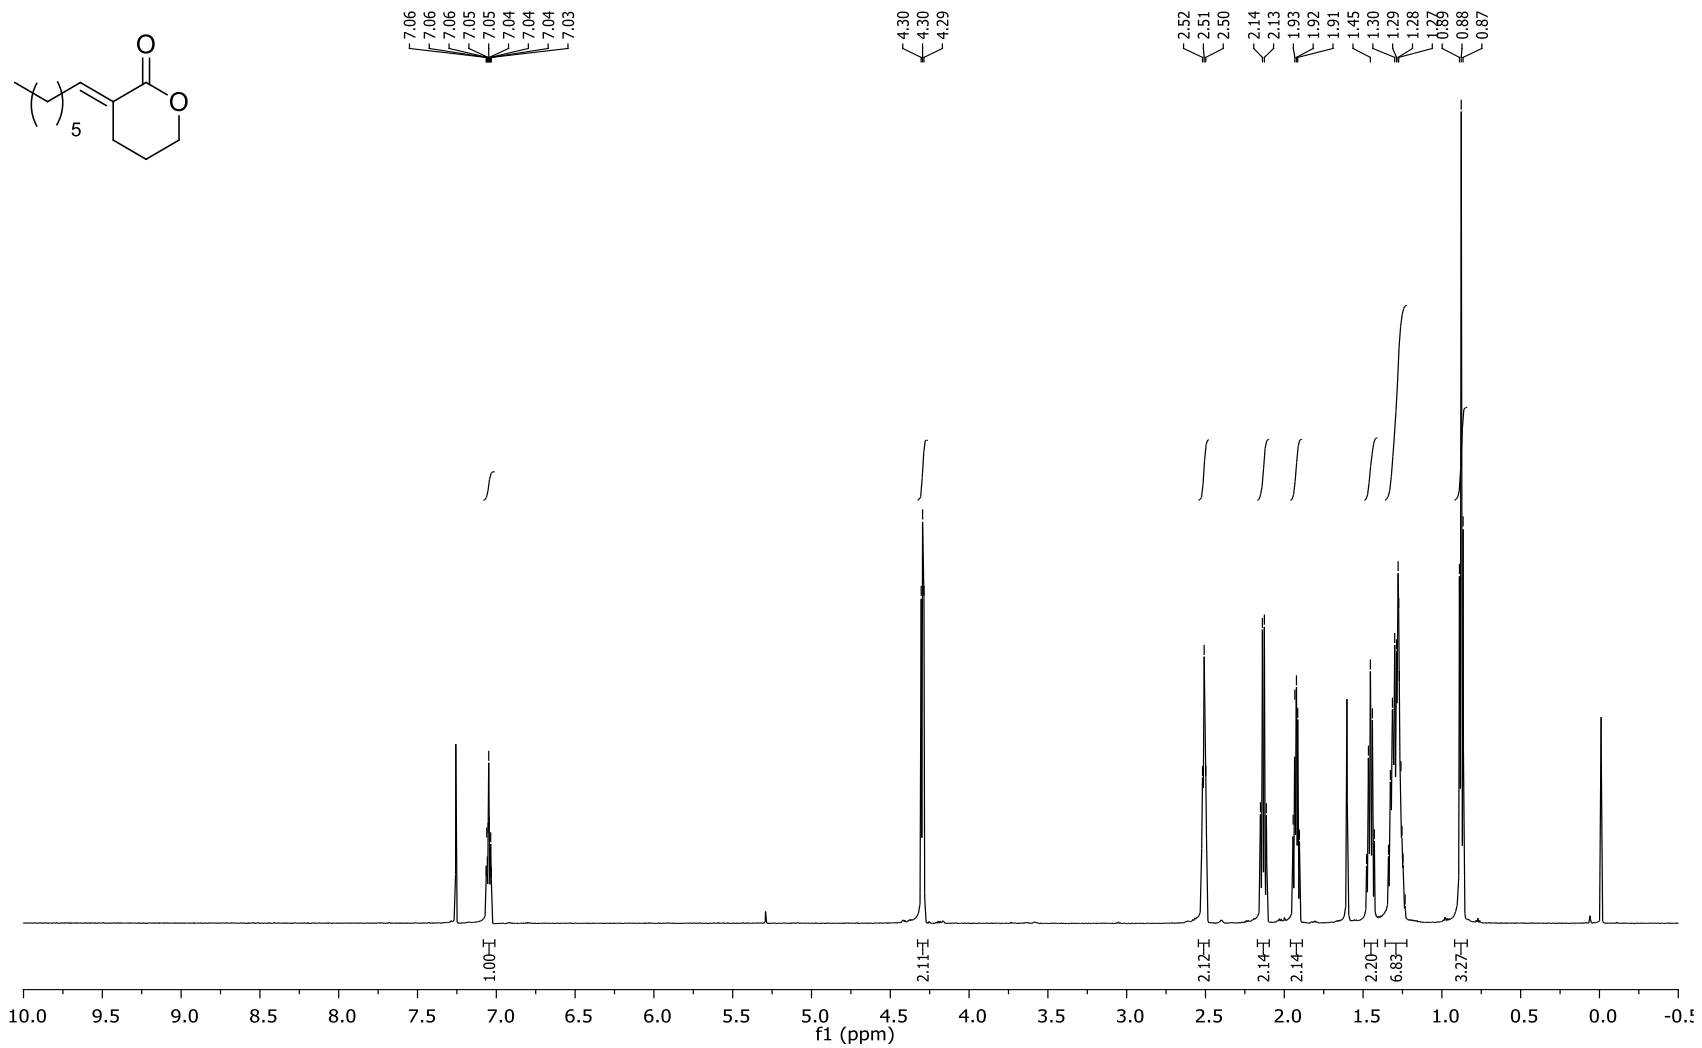

S2.30.  $^{13}\text{C}$  NMR (75 MHz) spectrum of **12E** in  $\text{CDCl}_3$ .

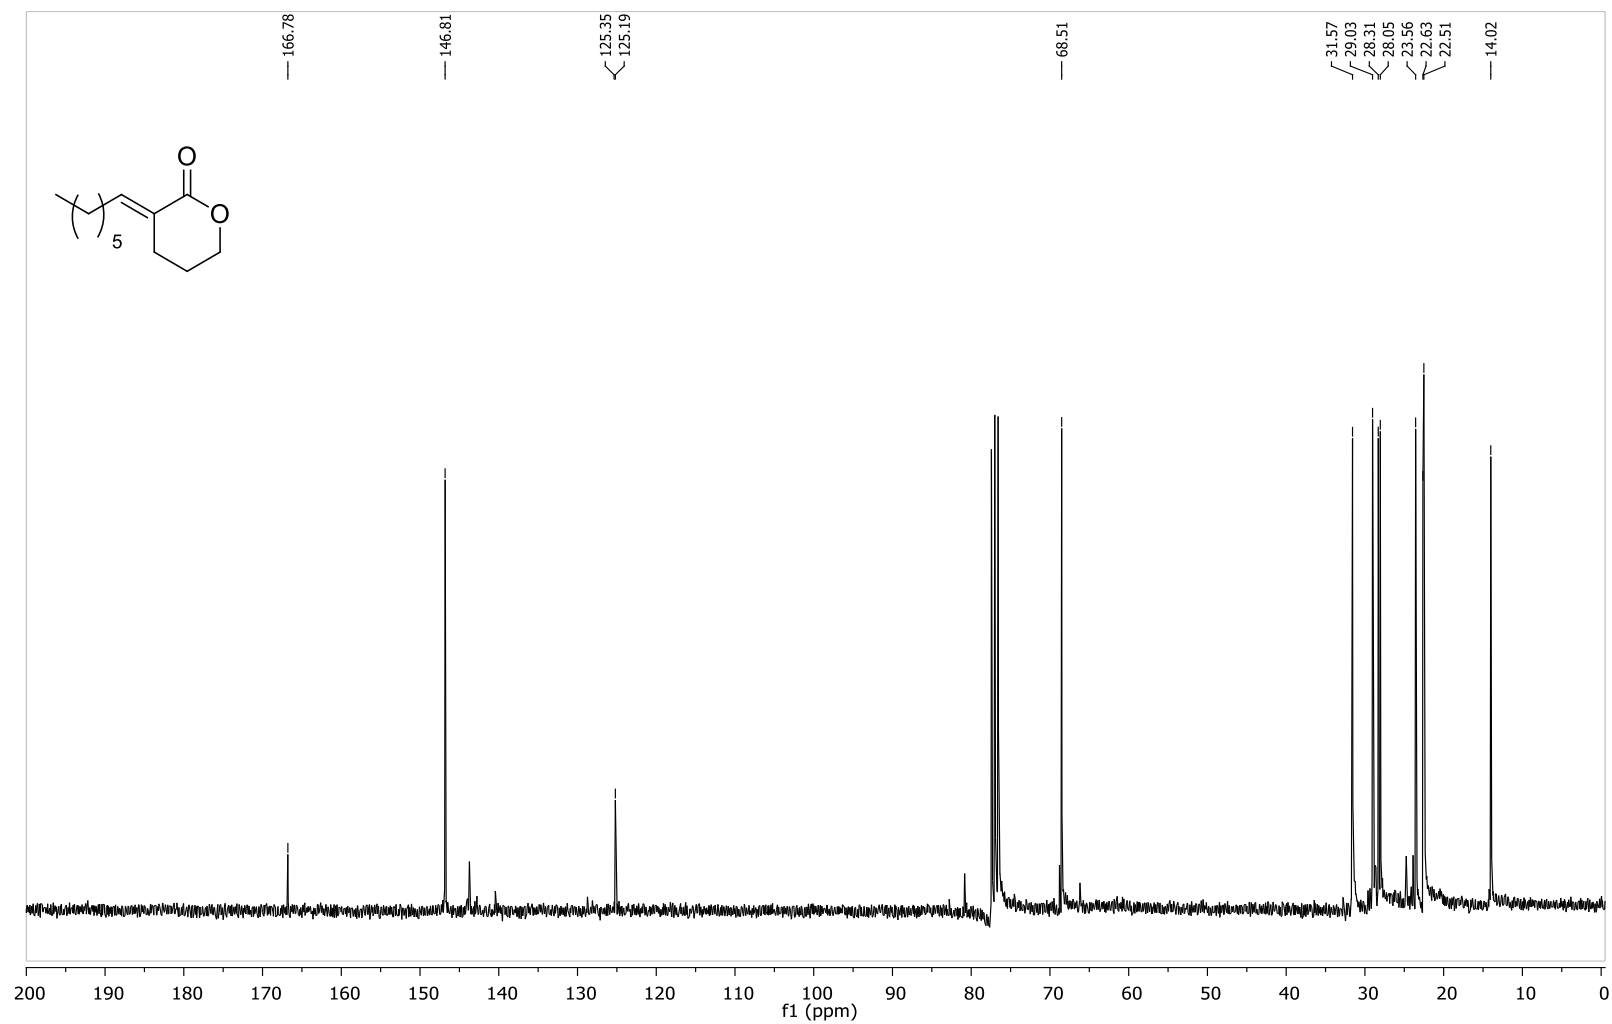

S2.31.  $^1\text{H}$  NMR (600 MHz) spectrum of **12Z** in  $\text{CDCl}_3$ .

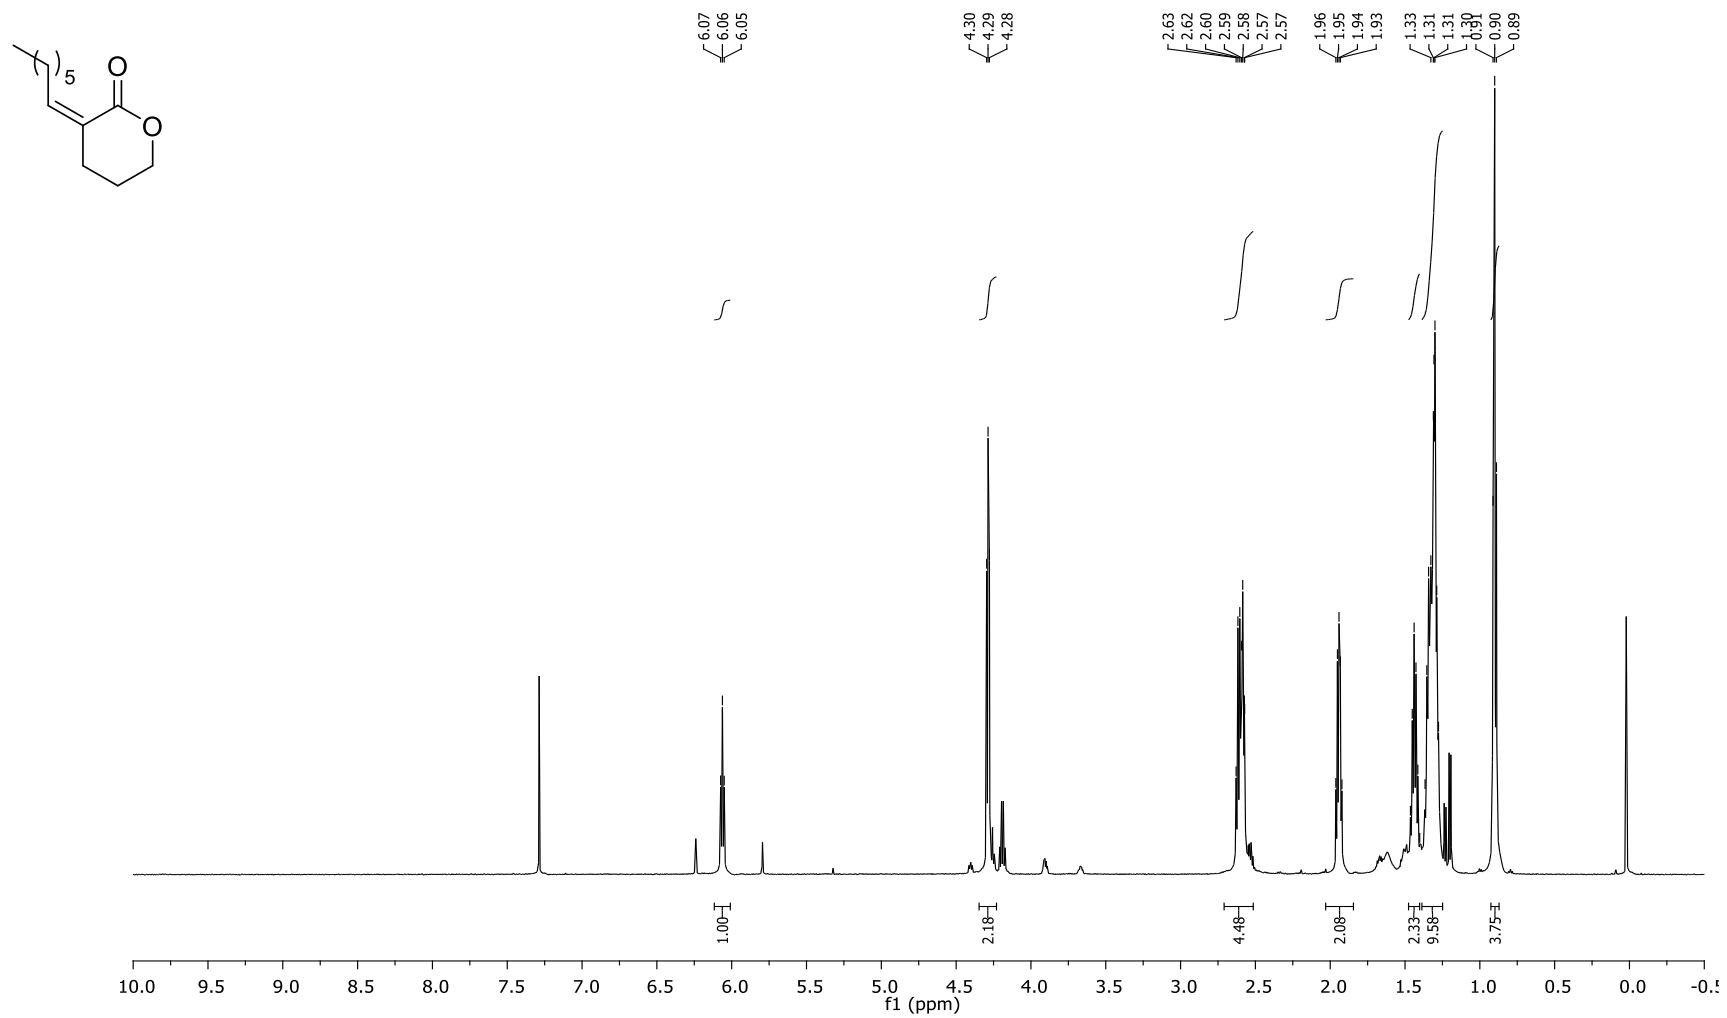

S2.32.  $^{13}\text{C}$  NMR (75 MHz) spectrum of **12Z** in  $\text{CDCl}_3$ .

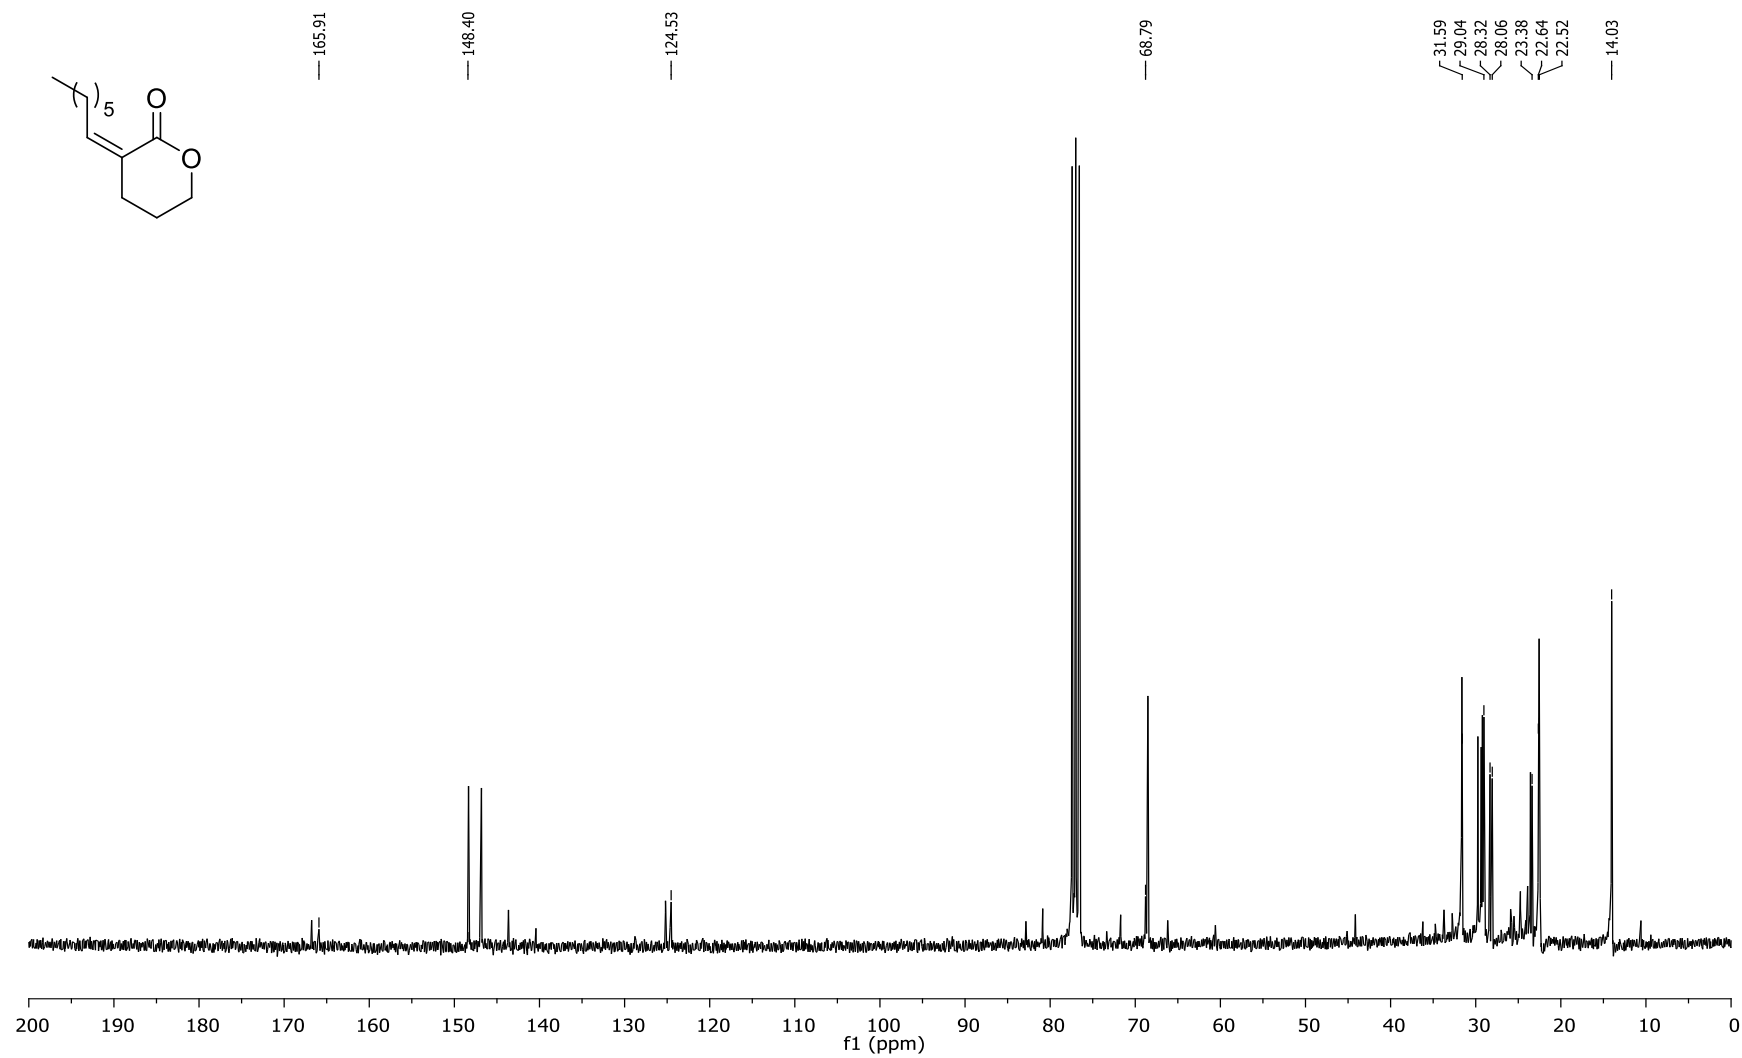

S2.33.  $^1\text{H}$  NMR (600 MHz) spectrum of **13E** in  $\text{CDCl}_3$ .

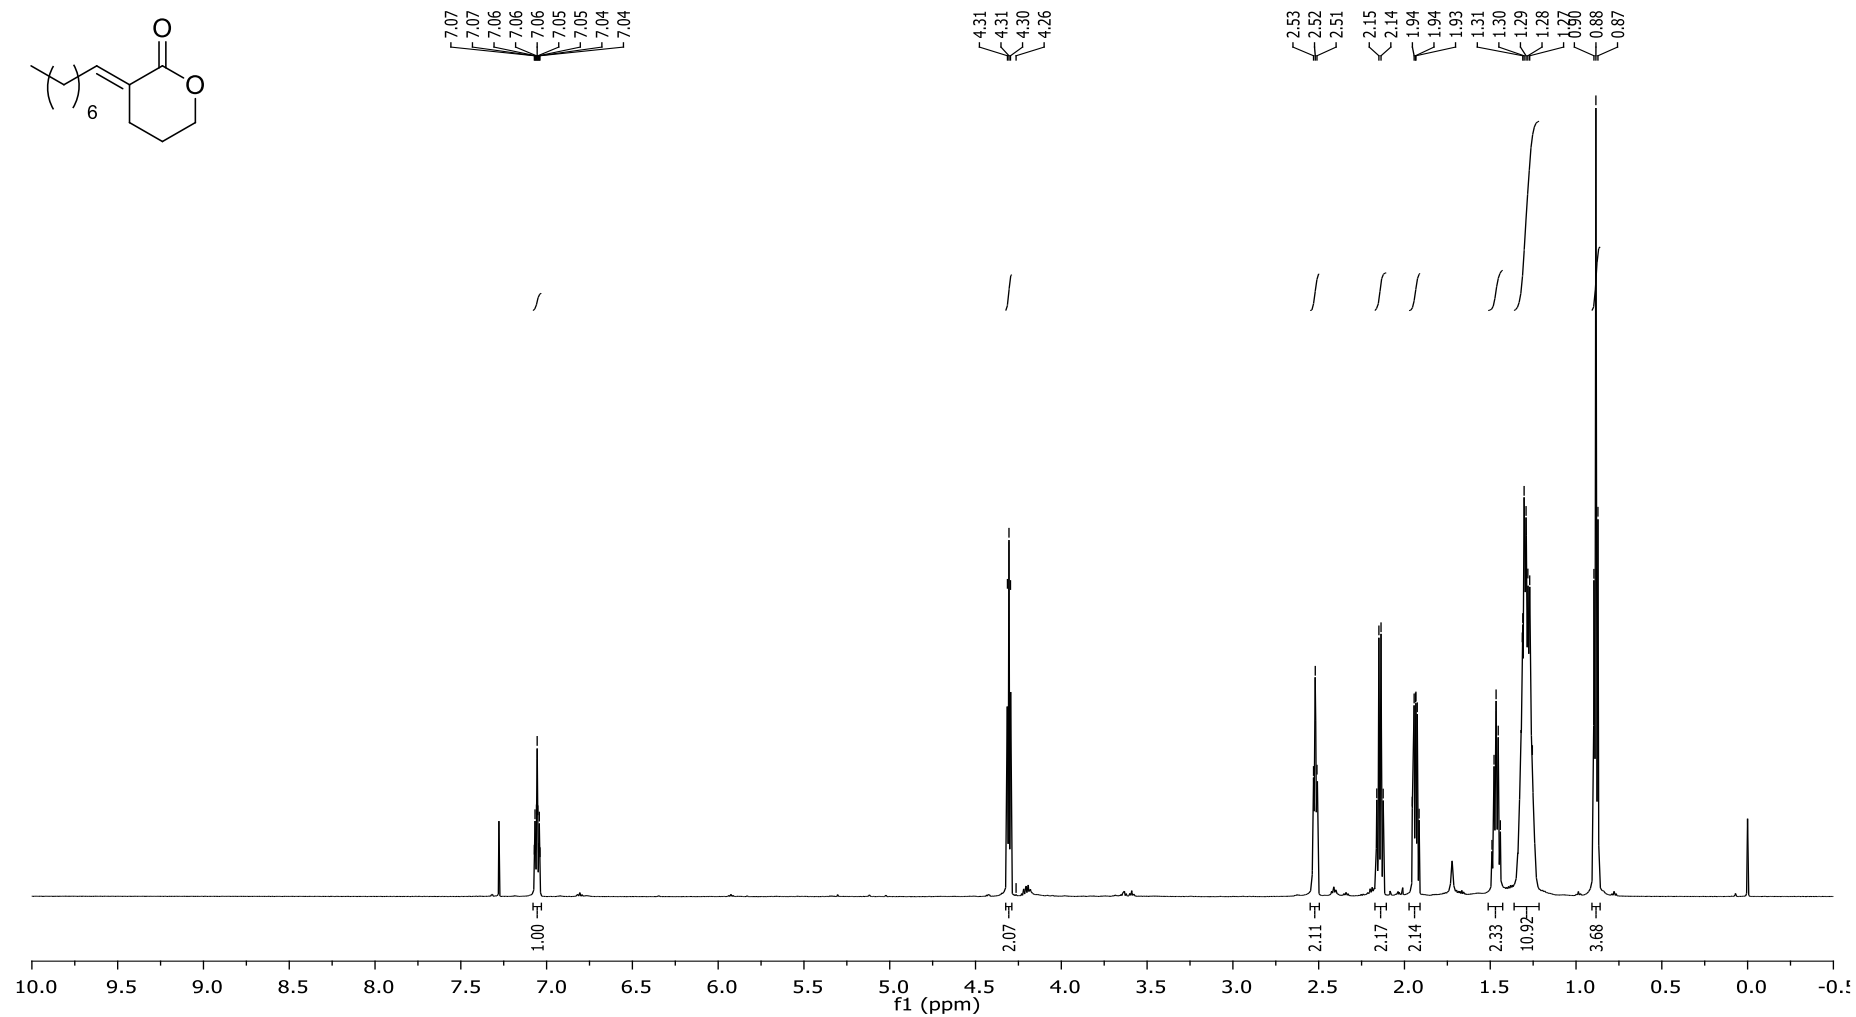



S2.34.  $^{13}\text{C}$  NMR (151 MHz) spectrum of **13E** in  $\text{CDCl}_3$ .

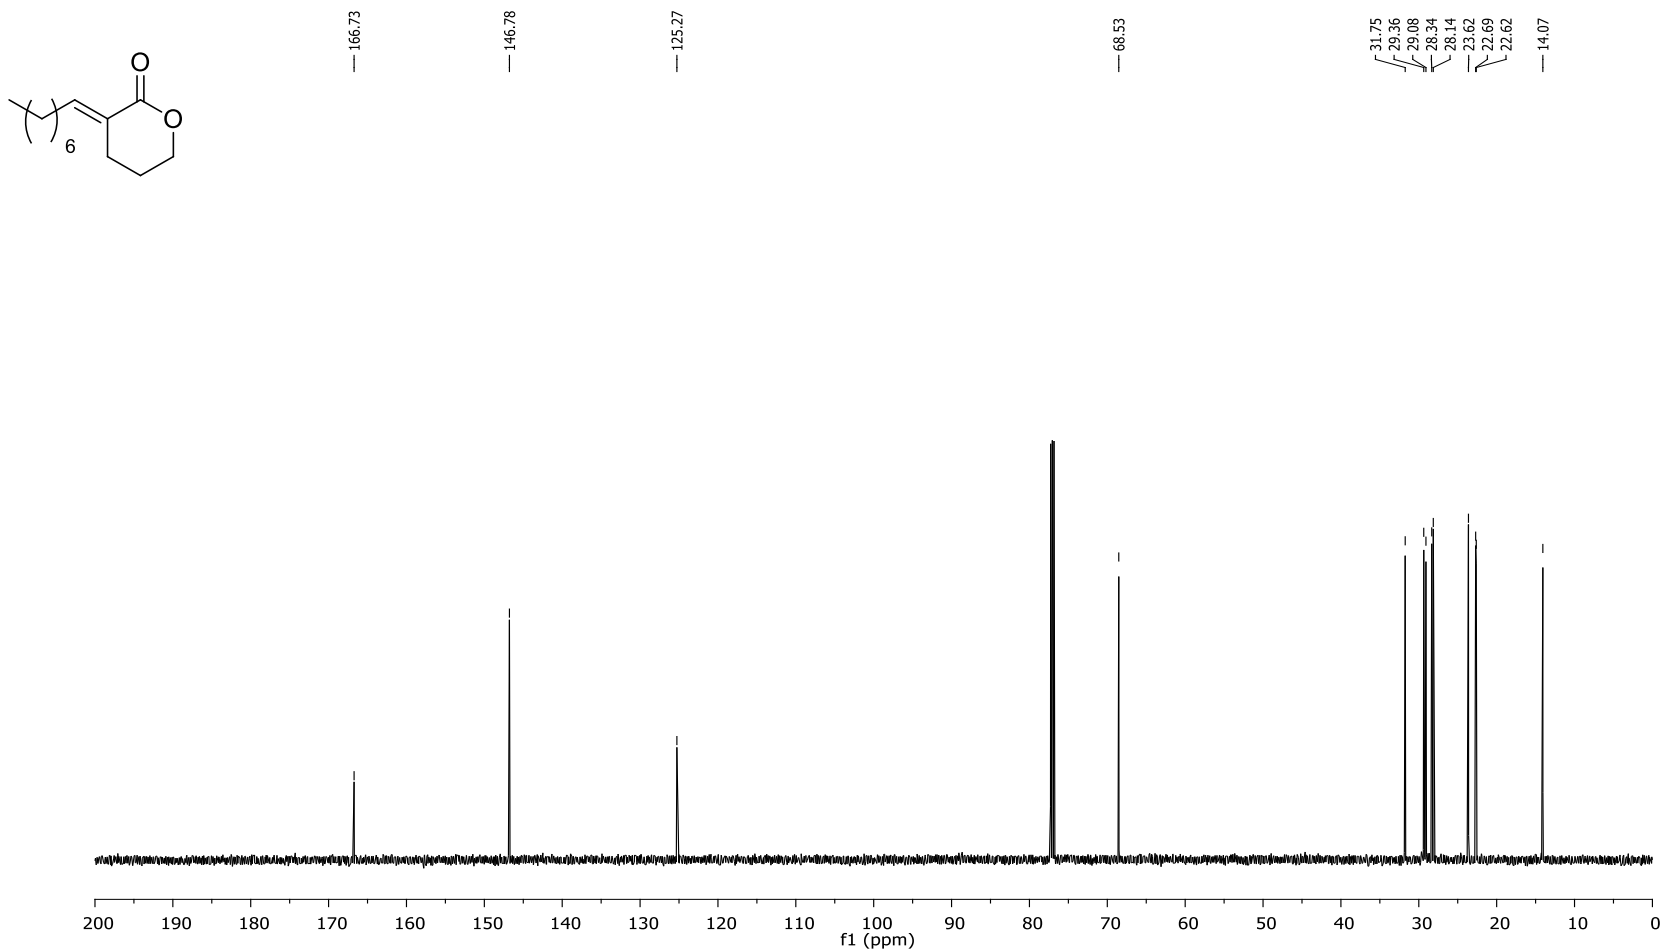

S2.35.  $^1\text{H}$  NMR (600 MHz) spectrum of **13Z** in  $\text{CDCl}_3$ .

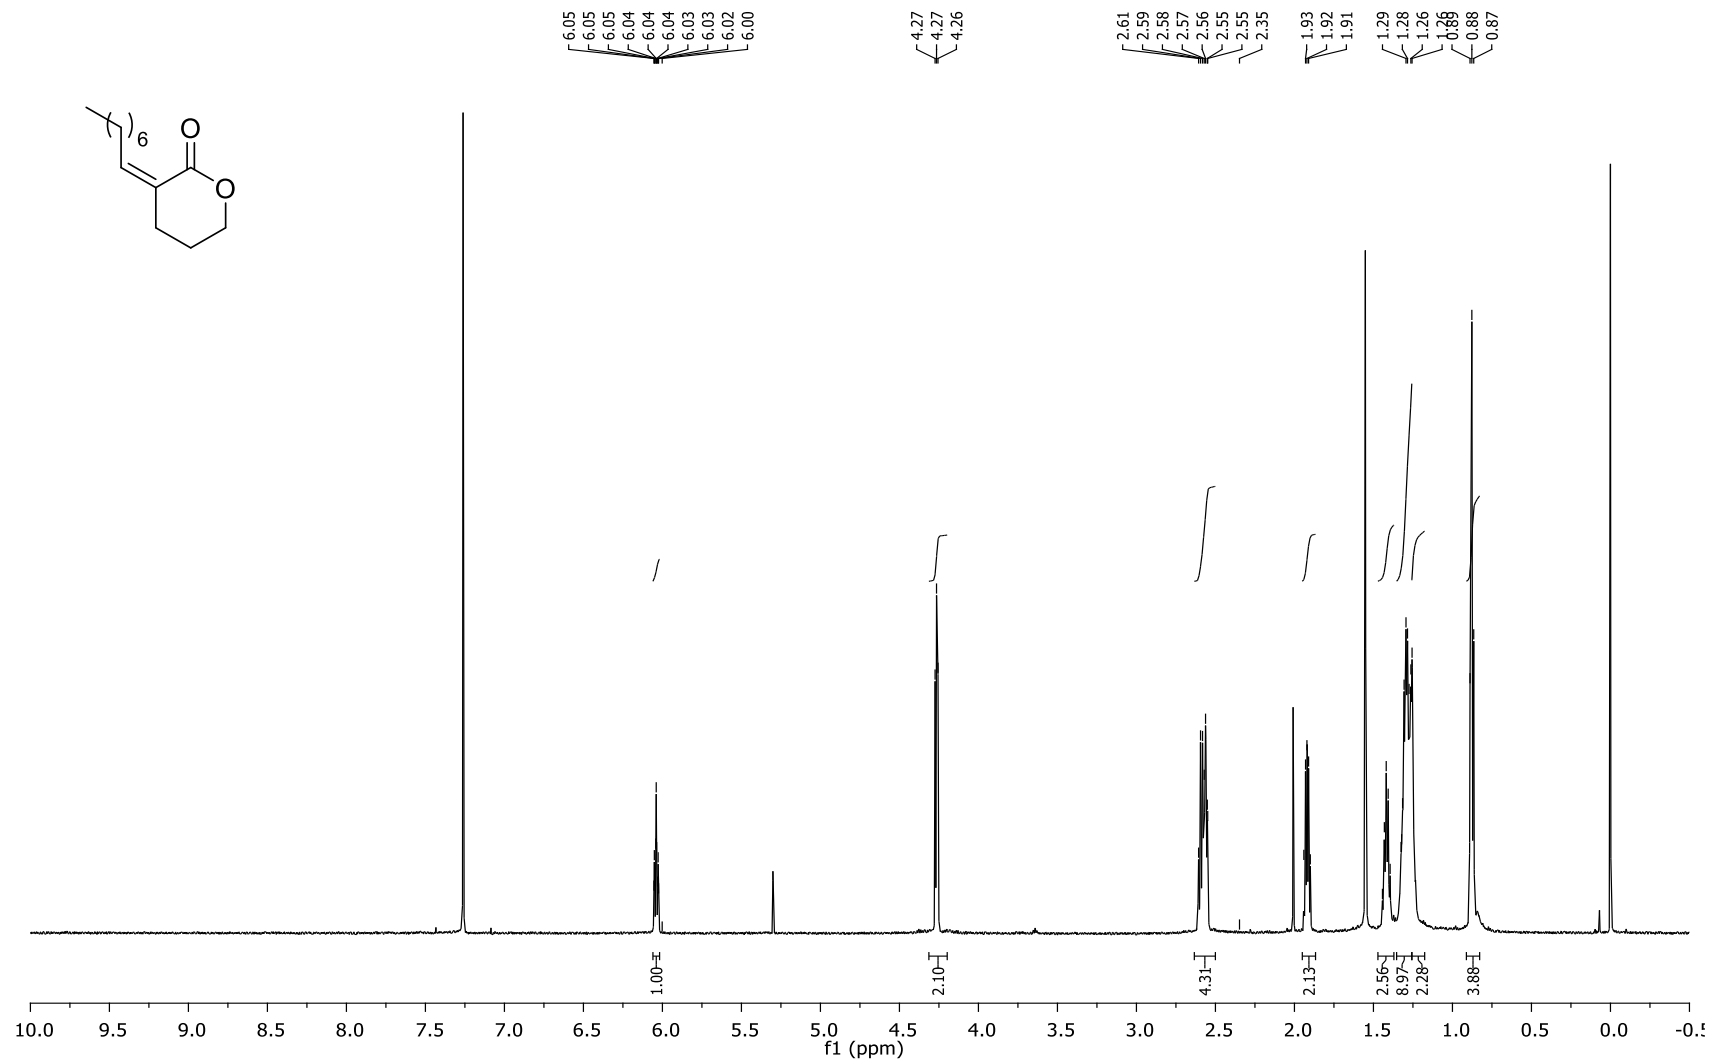

S2.36.  $^{13}\text{C}$  NMR (151 MHz) spectrum of **13Z** in  $\text{CDCl}_3$ .

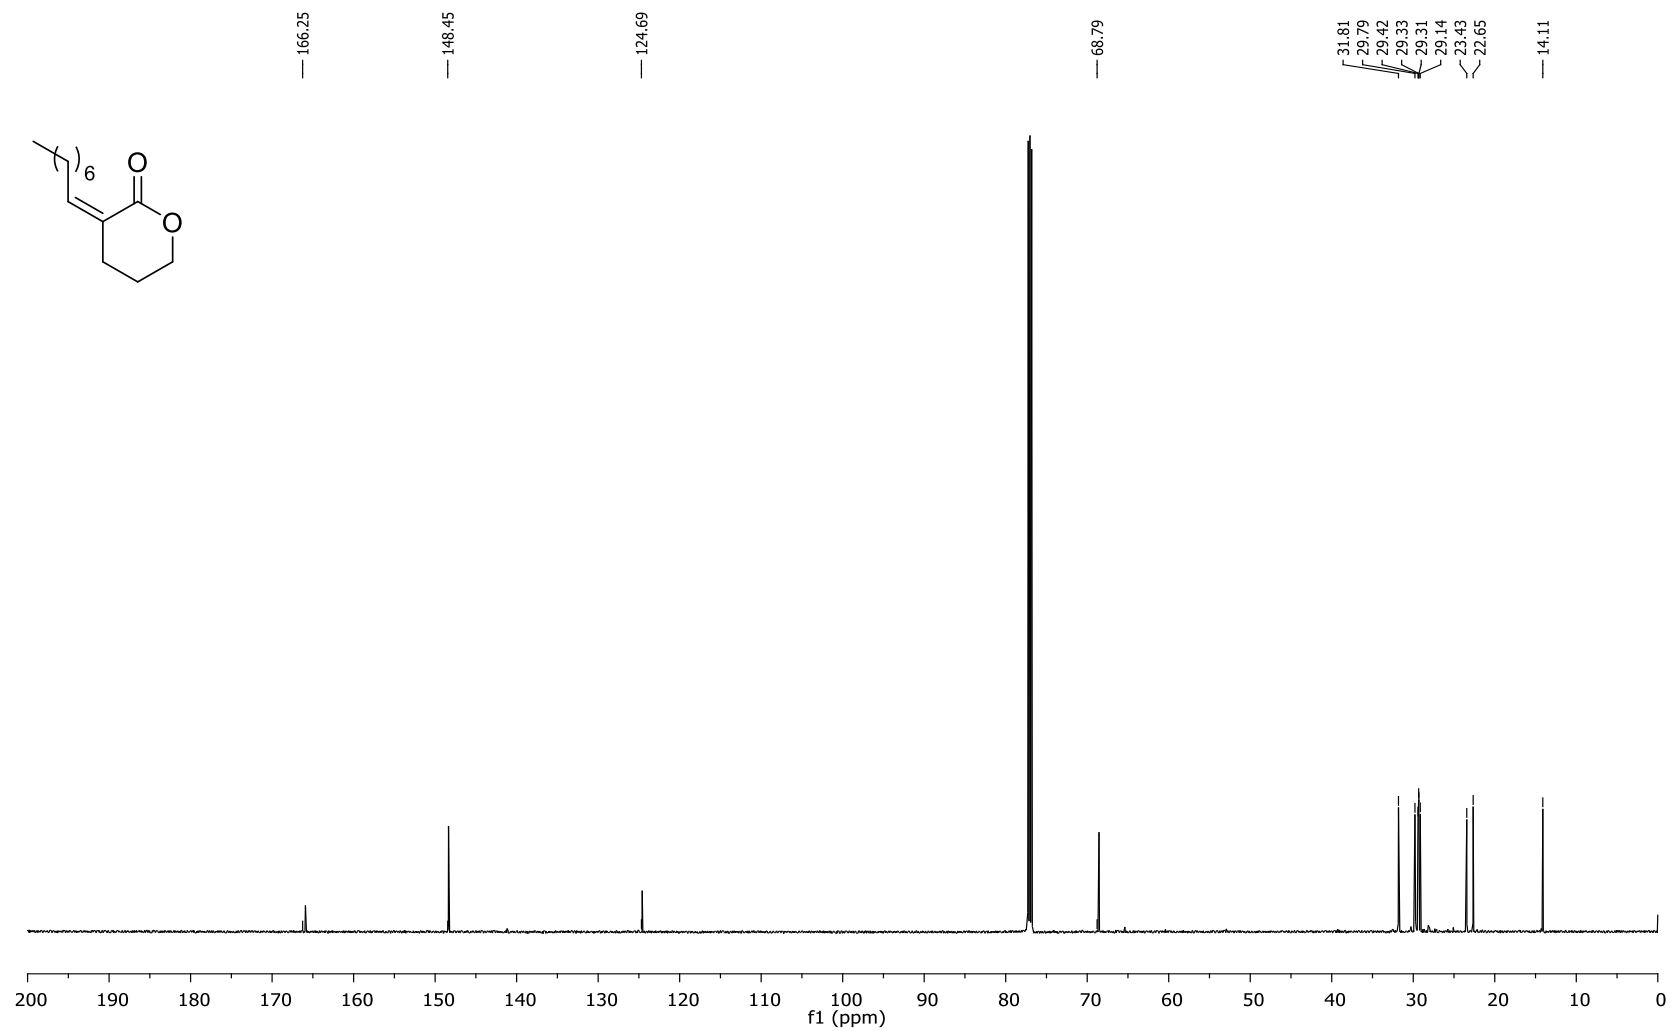

S2.37.  $^1\text{H}$  NMR (600 MHz) spectrum of **14E** in  $\text{CDCl}_3$ .

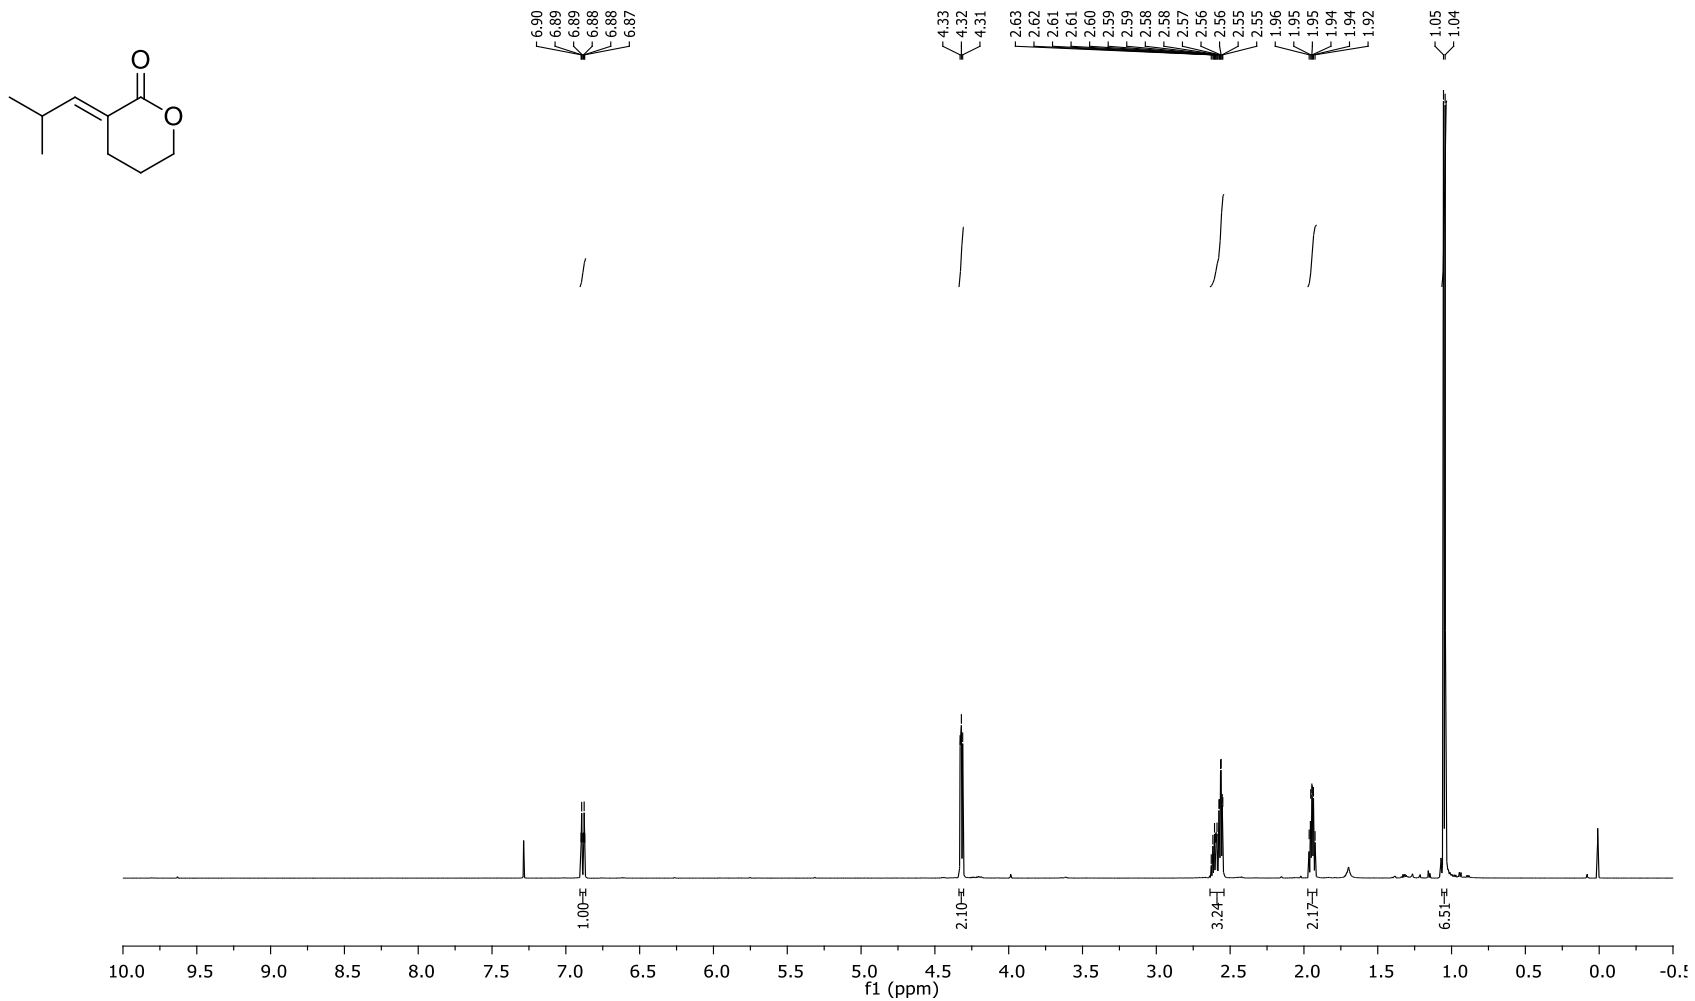

S2.38.  $^{13}\text{C}$  NMR (75 MHz) spectrum of **14E** in  $\text{CDCl}_3$ .

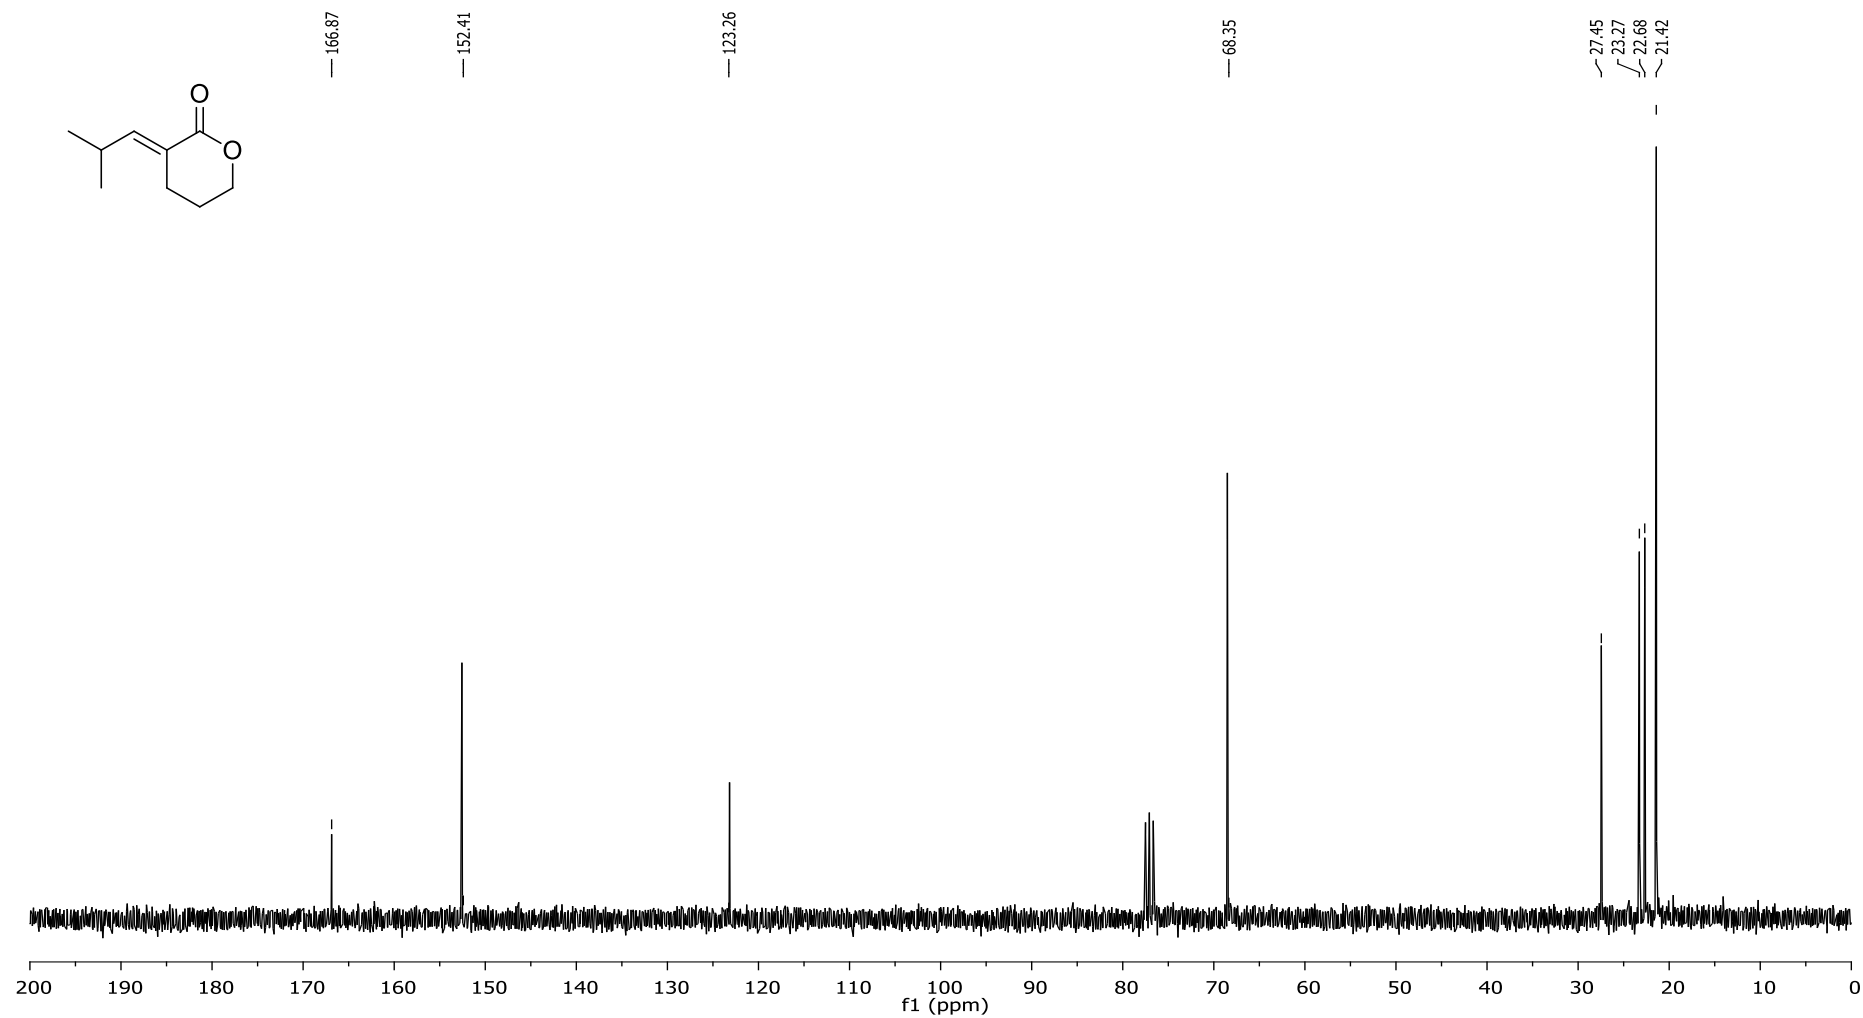

S2.39.  $^1\text{H}$  NMR (600 MHz) spectrum of **15E** in  $\text{CDCl}_3$ .

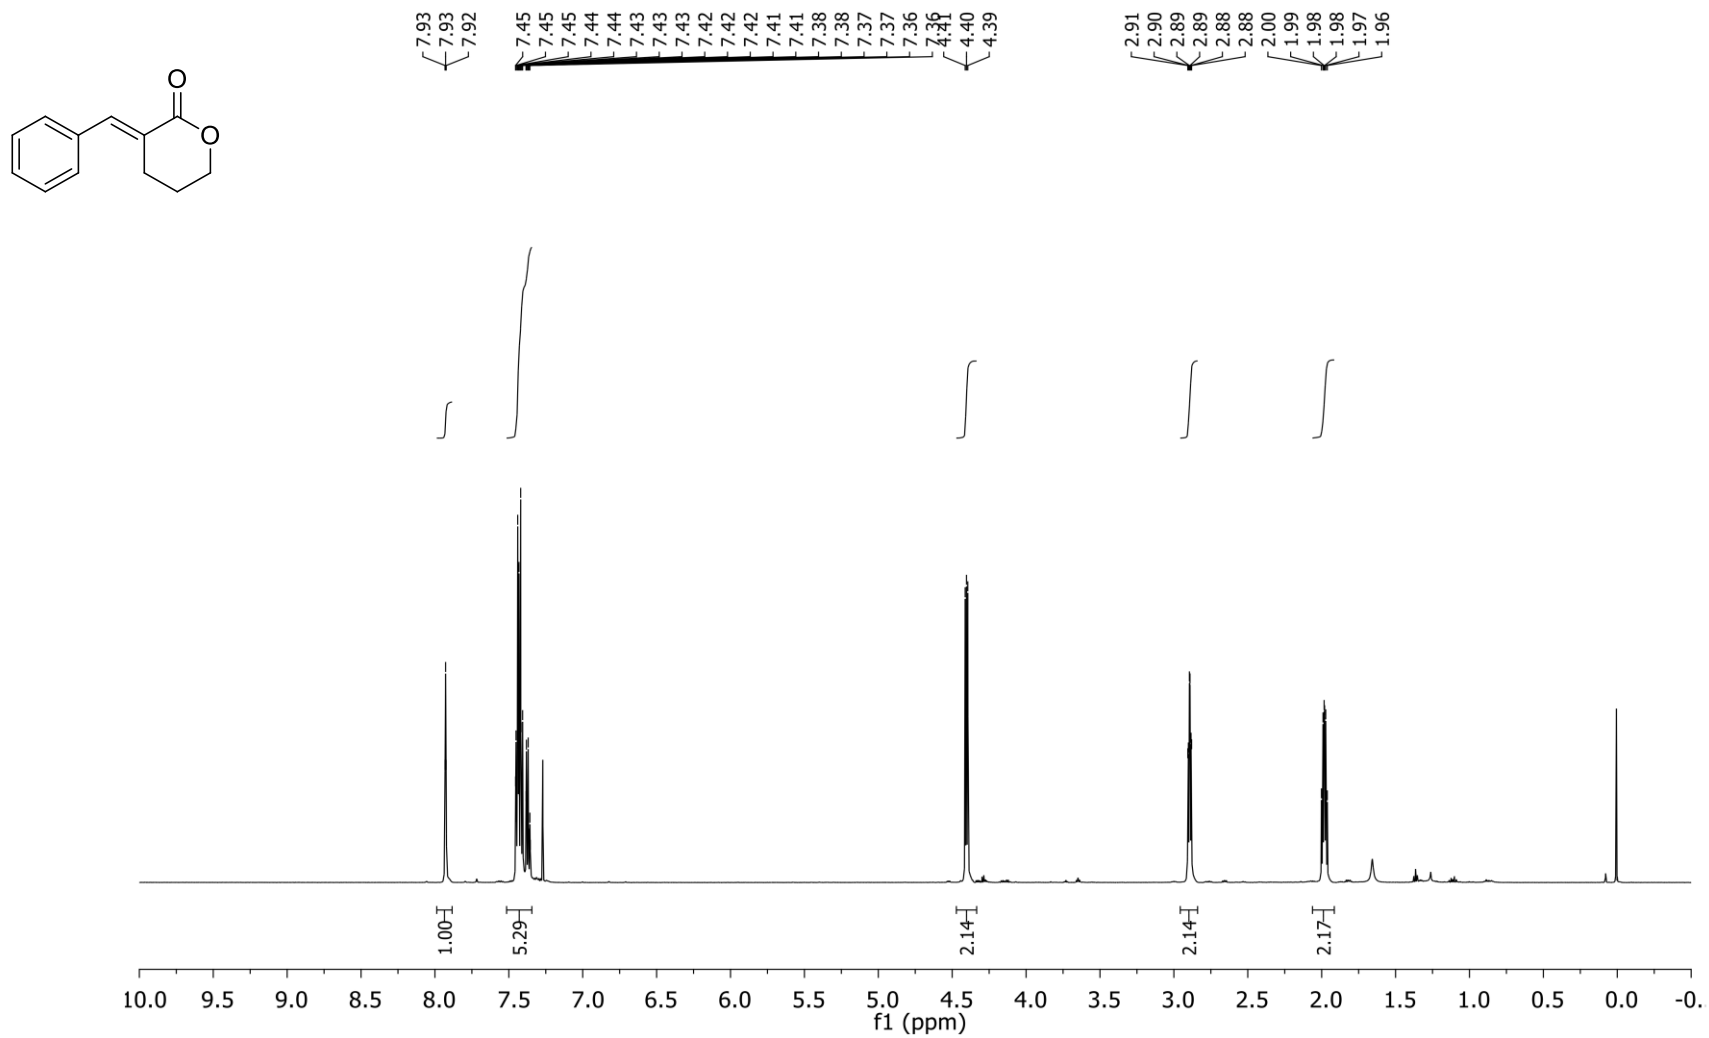

S2.40.  $^{13}\text{C}$  NMR (151 MHz) spectrum of **15E** in  $\text{CDCl}_3$ .

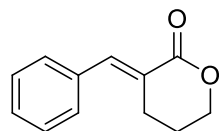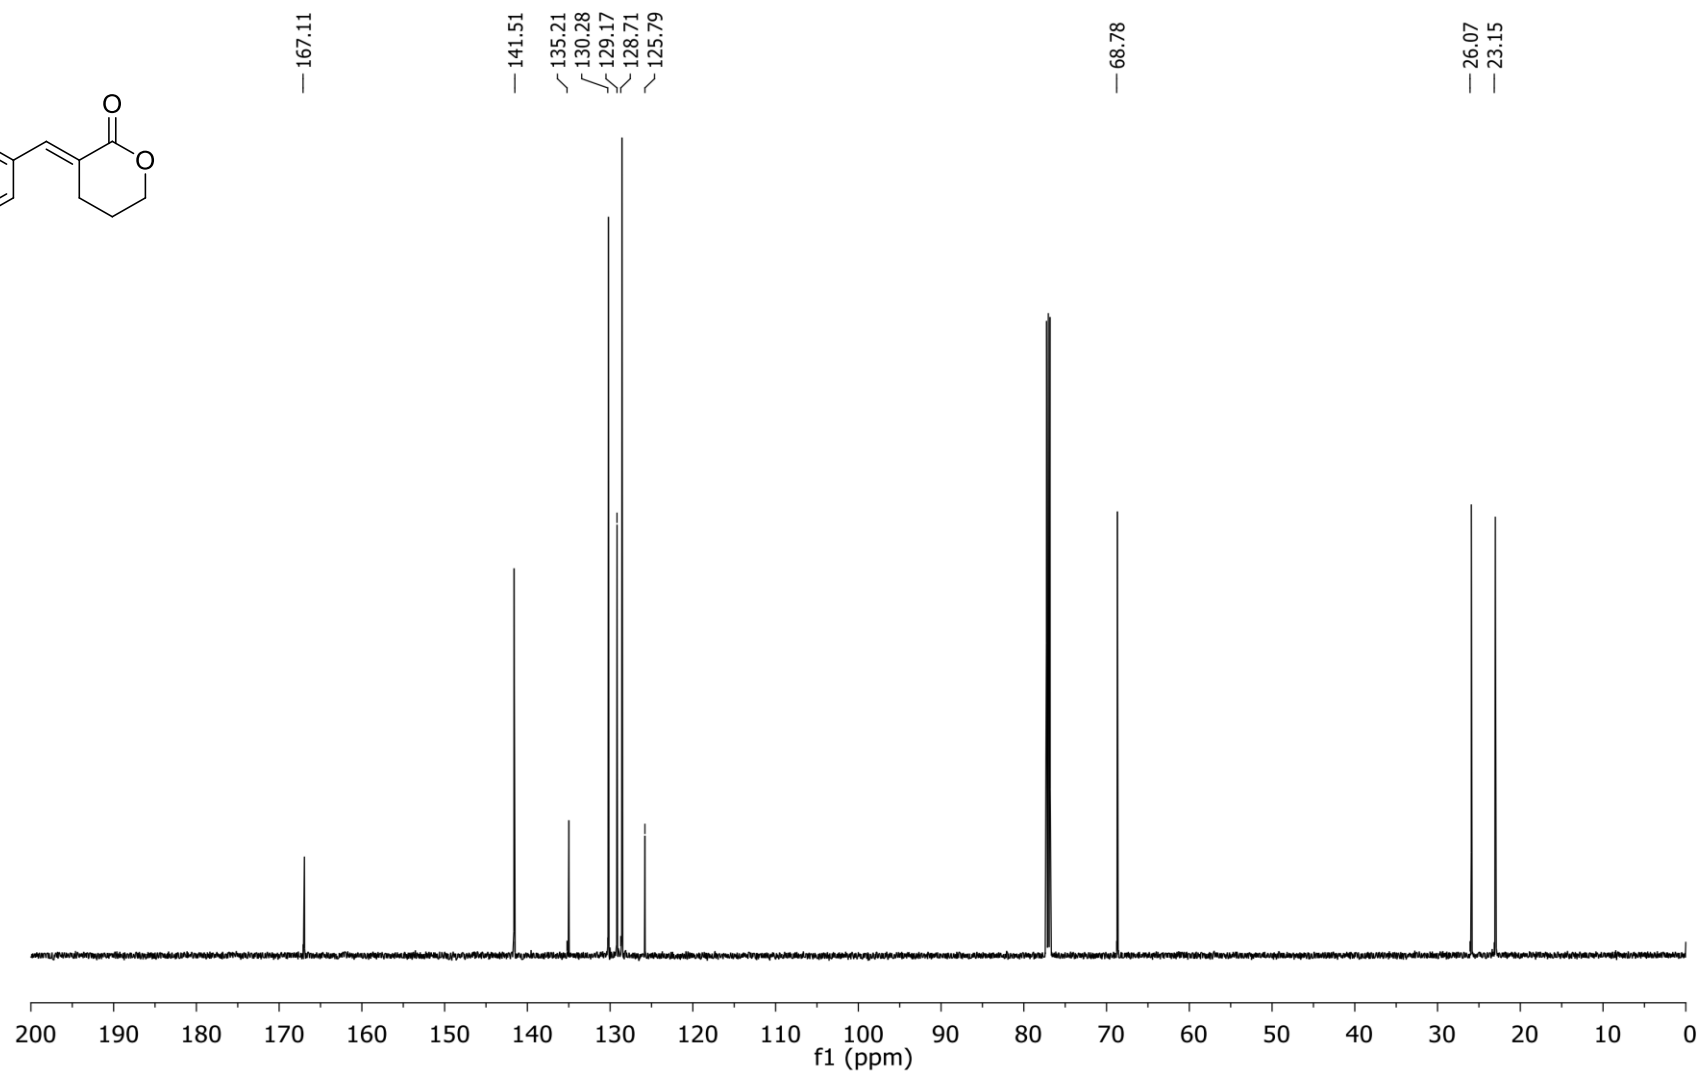

S2.41.  $^1\text{H}$  NMR (600 MHz) spectrum of **16E** in  $\text{CDCl}_3$  in  $\text{CDCl}_3$ .

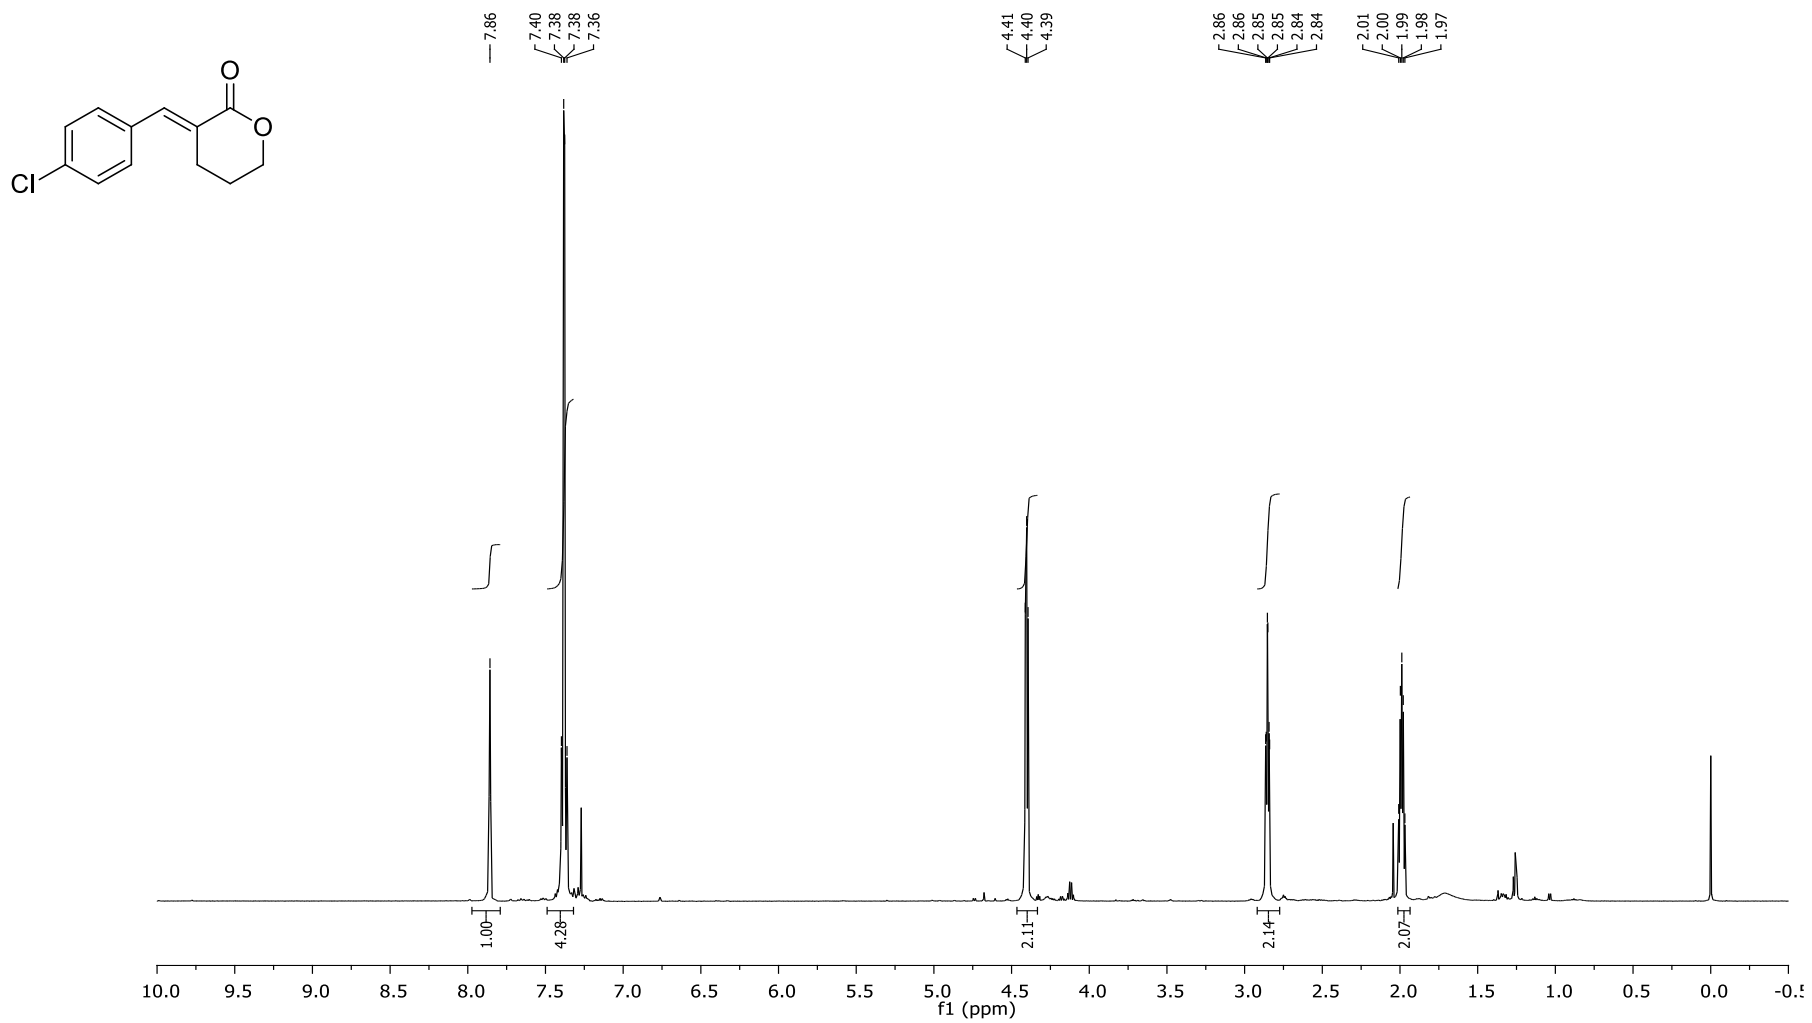



S2.42.  $^{13}\text{C}$  NMR (151 MHz) spectrum of **16E** in  $\text{CDCl}_3$ .

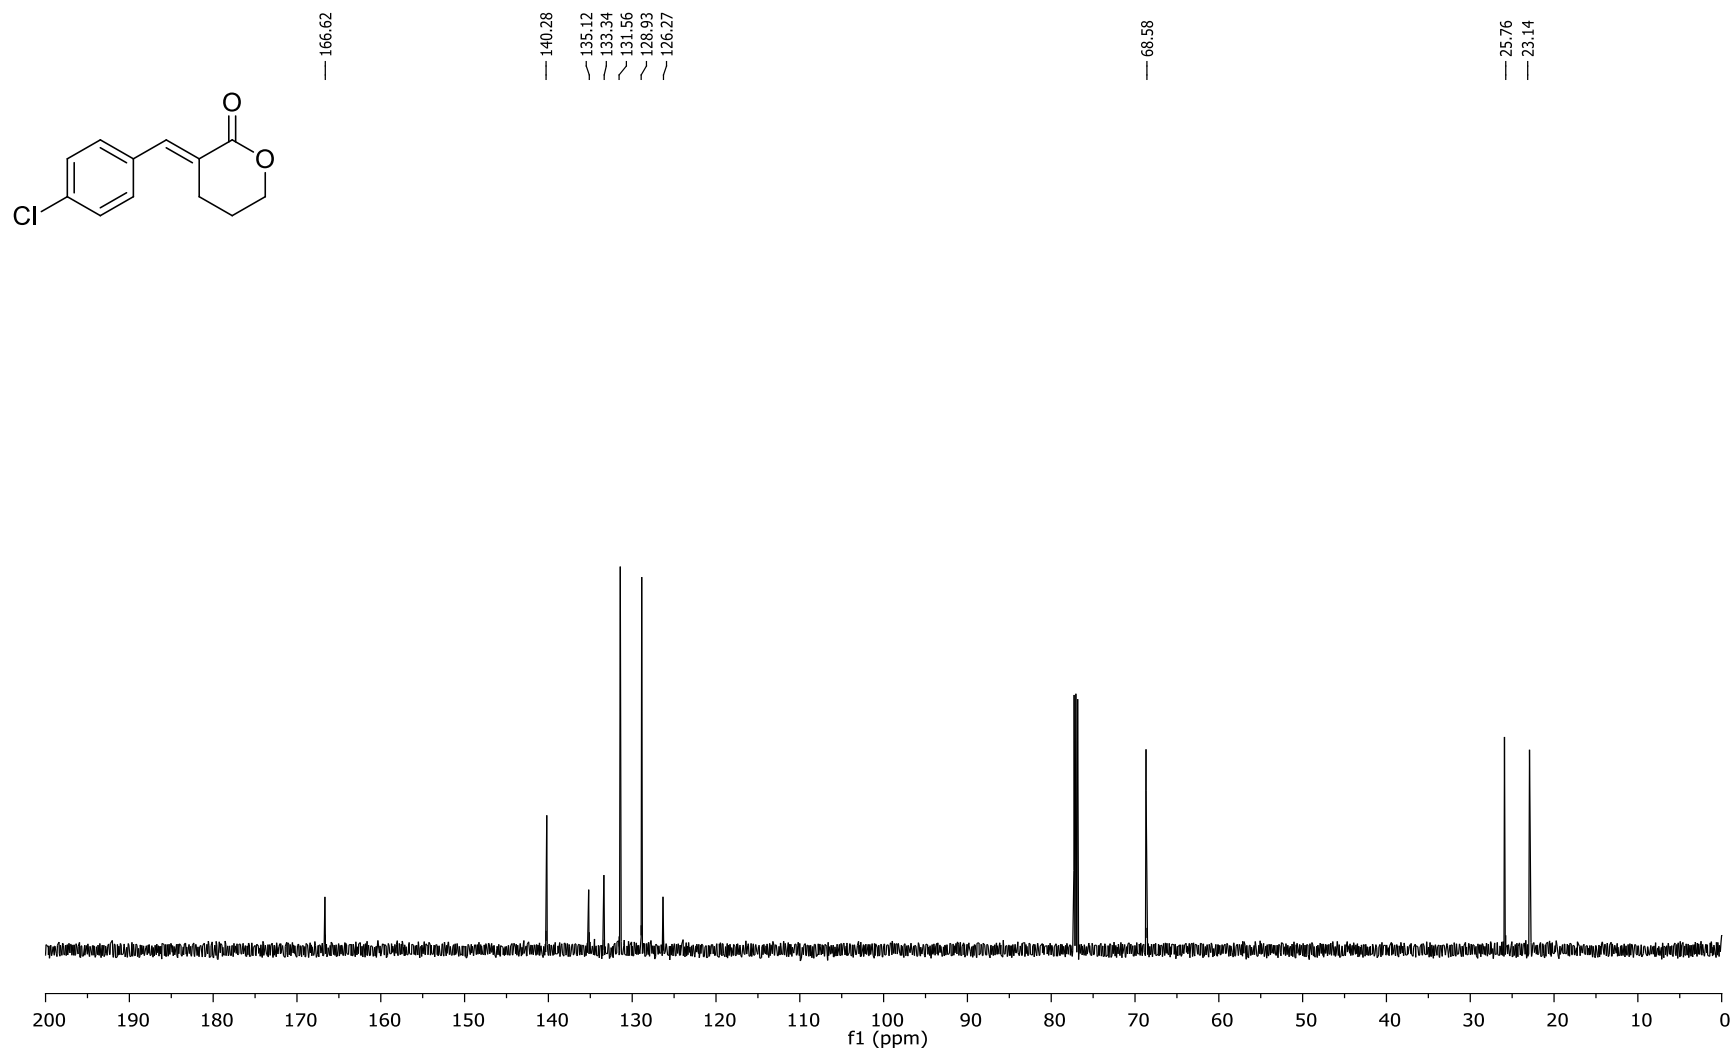

S2.43.  $^1\text{H}$  NMR (600 MHz) spectrum of **17E** in  $\text{CDCl}_3$  in  $\text{CDCl}_3$ .

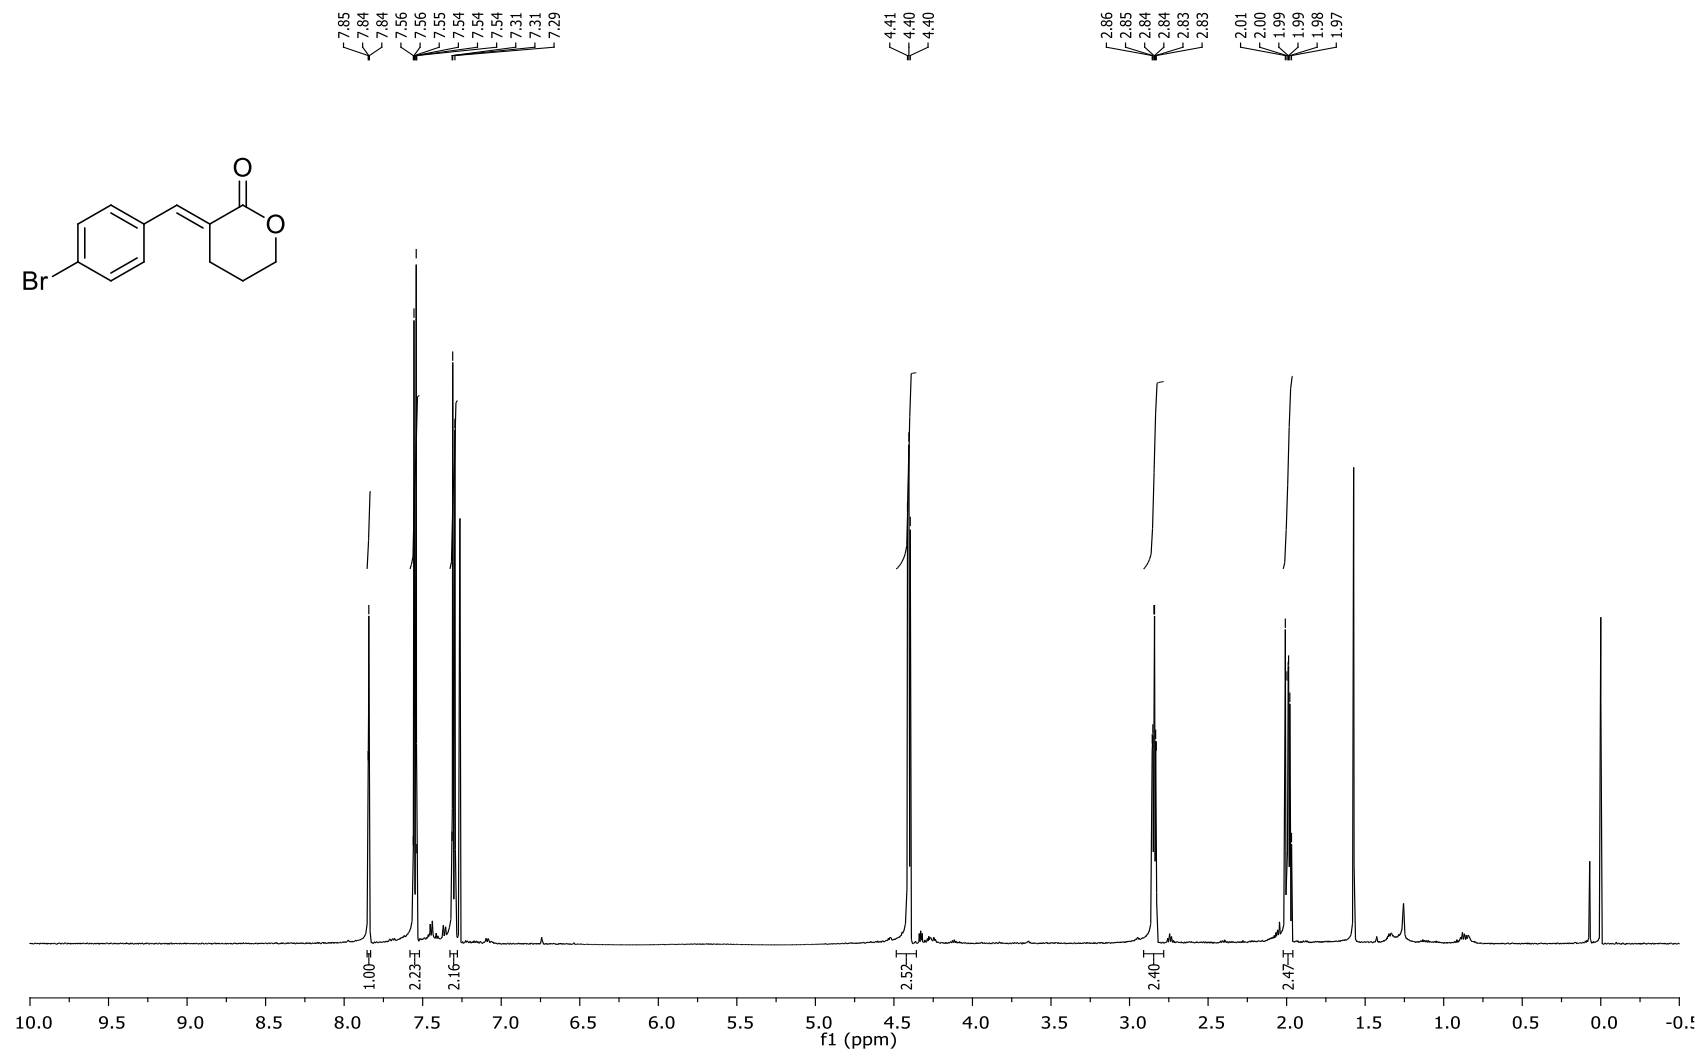

S2.44.  $^{13}\text{C}$  NMR (151 MHz) spectrum of **17E** in  $\text{CDCl}_3$ .

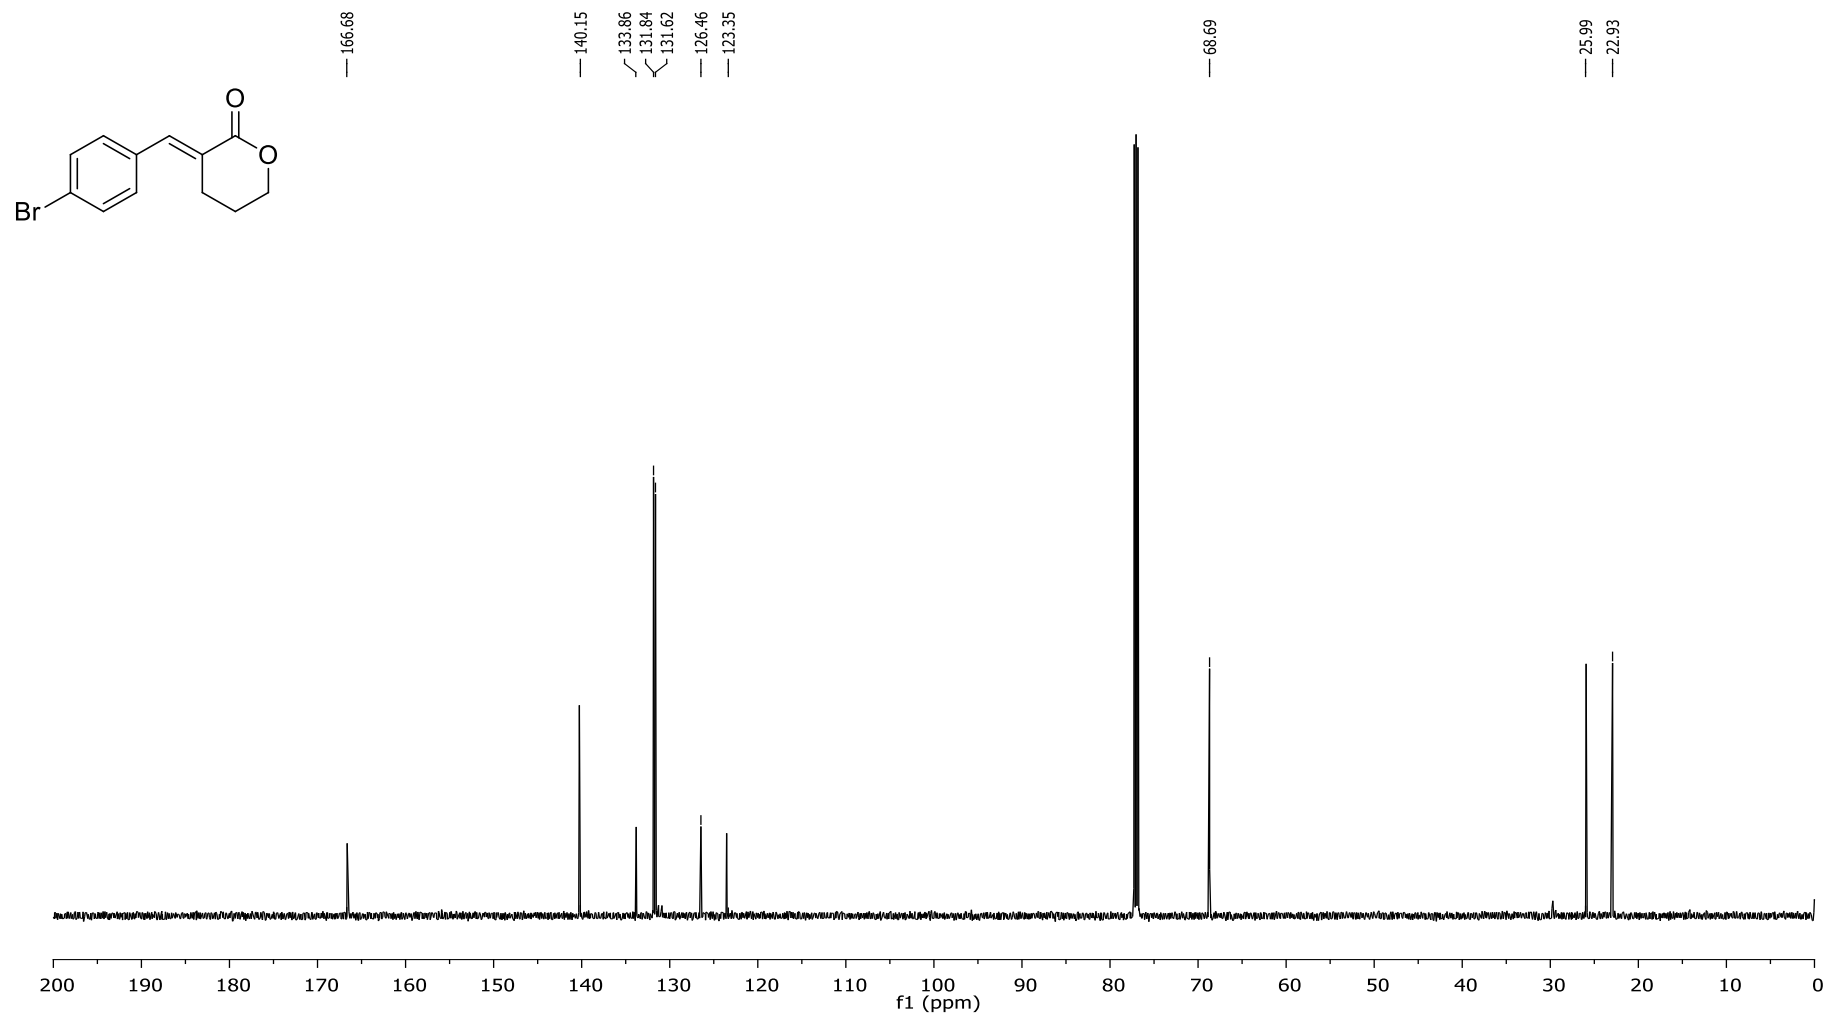

S2.45.  $^1\text{H}$  NMR (600 MHz) spectrum of **18E** in  $\text{CDCl}_3$ .

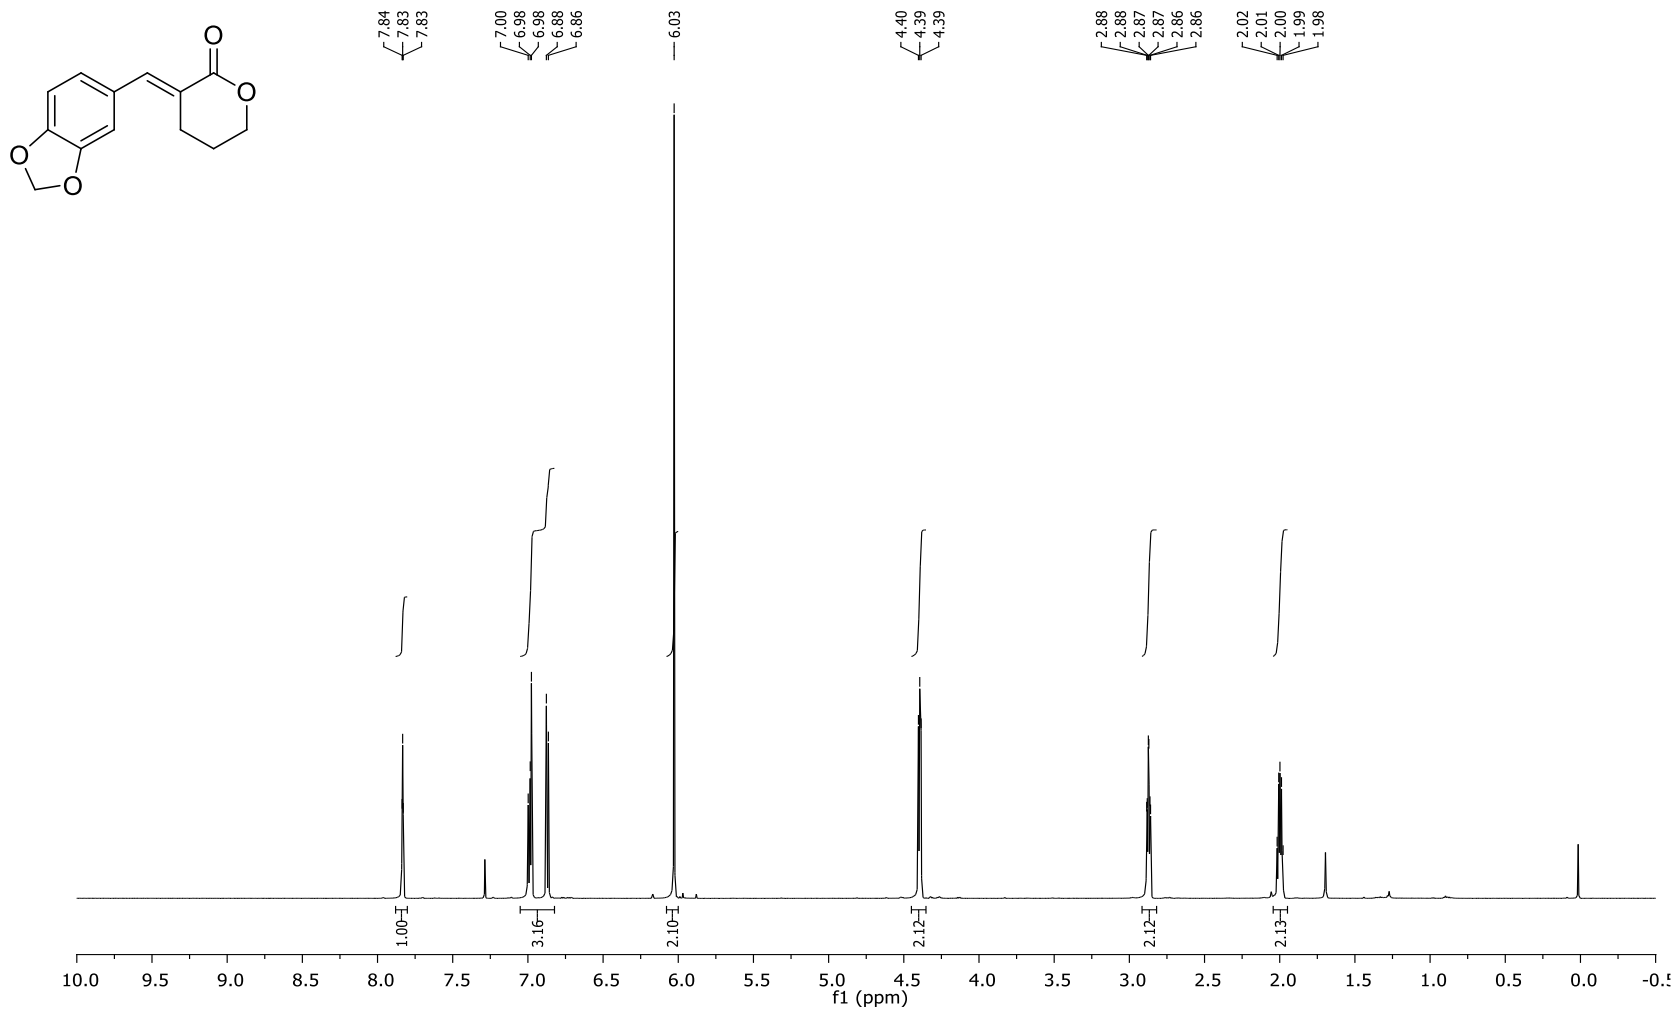

S2.46.  $^{13}\text{C}$  NMR (151 MHz) spectrum of **18E** in  $\text{CDCl}_3$ .

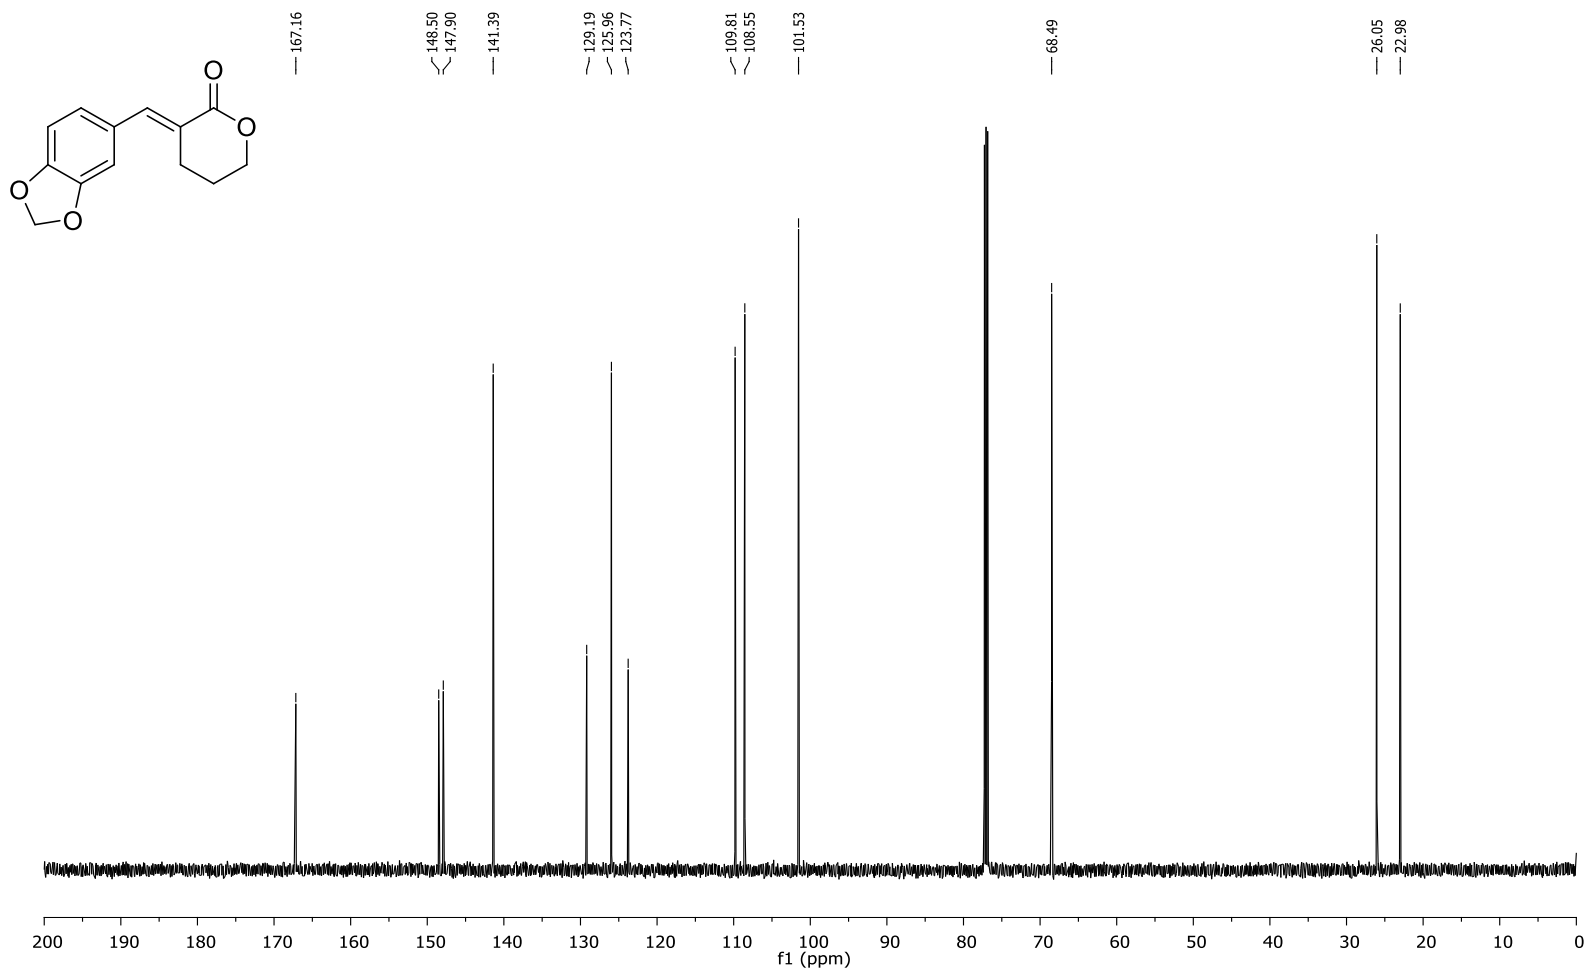

S2.47.  $^1\text{H}$  NMR (300 MHz) spectrum of **19E** in  $\text{CDCl}_3$ .

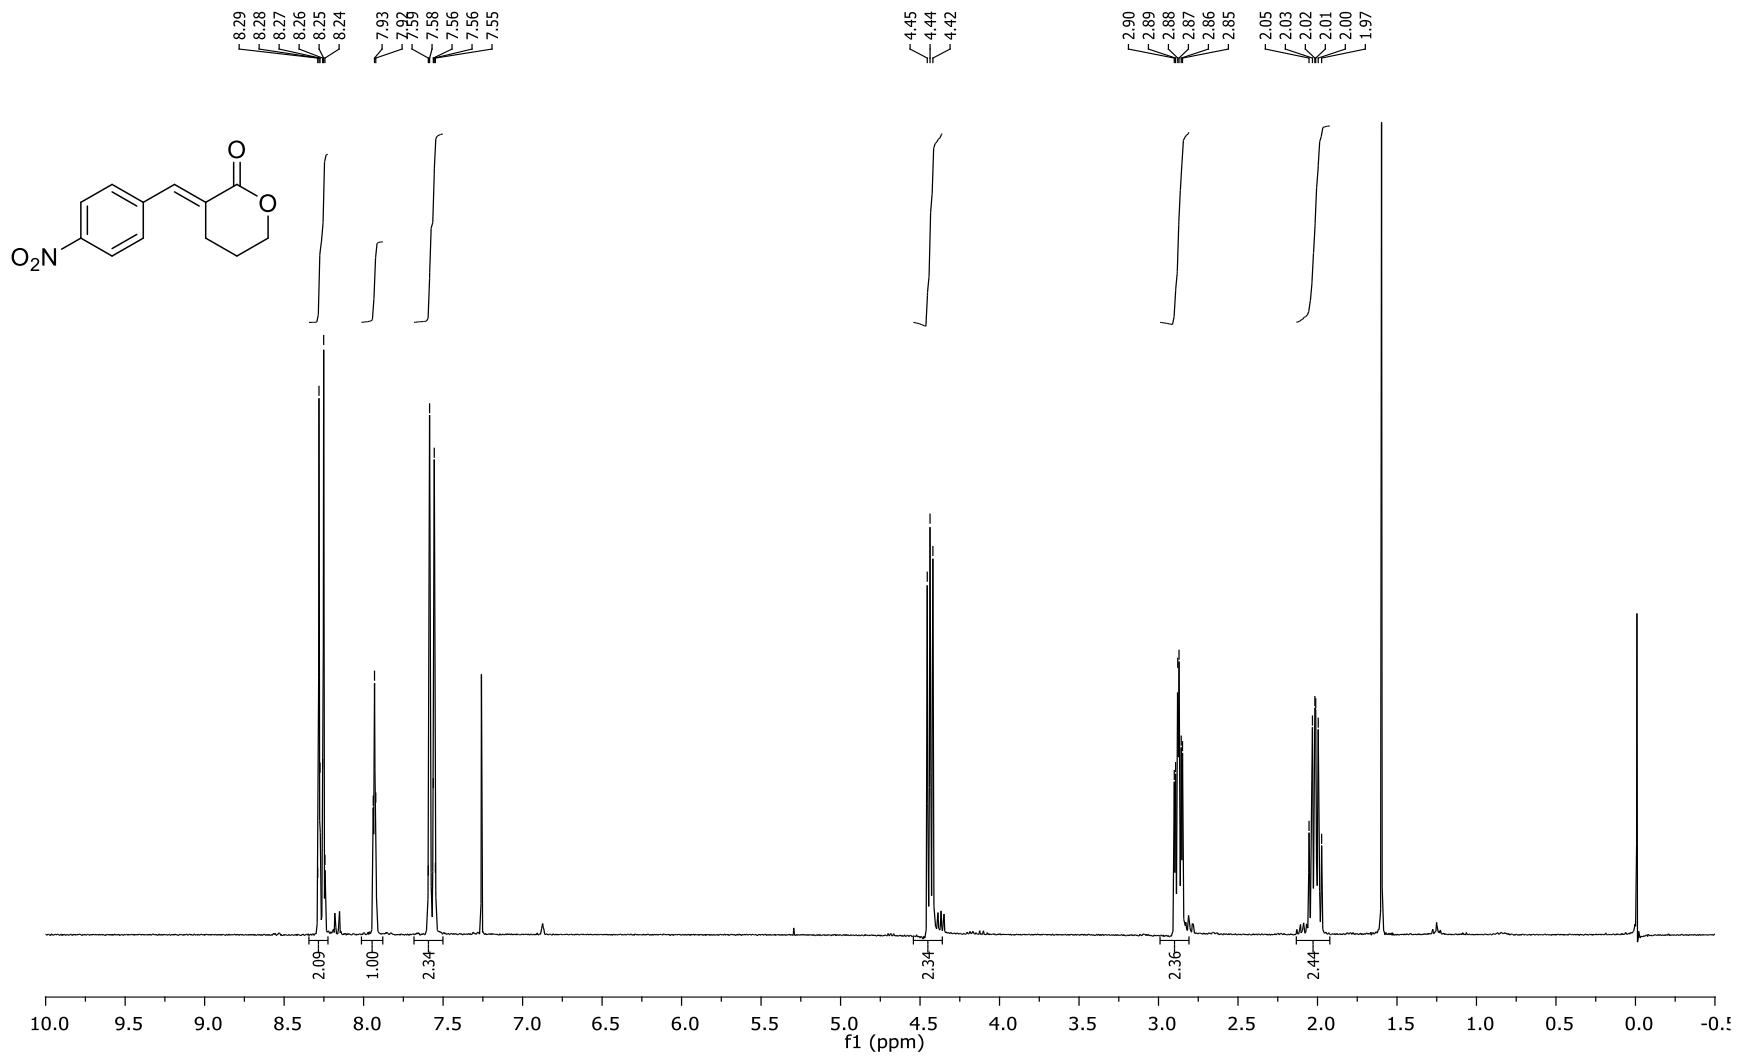

S2.48.  $^{13}\text{C}$  NMR (75 MHz) spectrum of **19E** in  $\text{CDCl}_3$ .

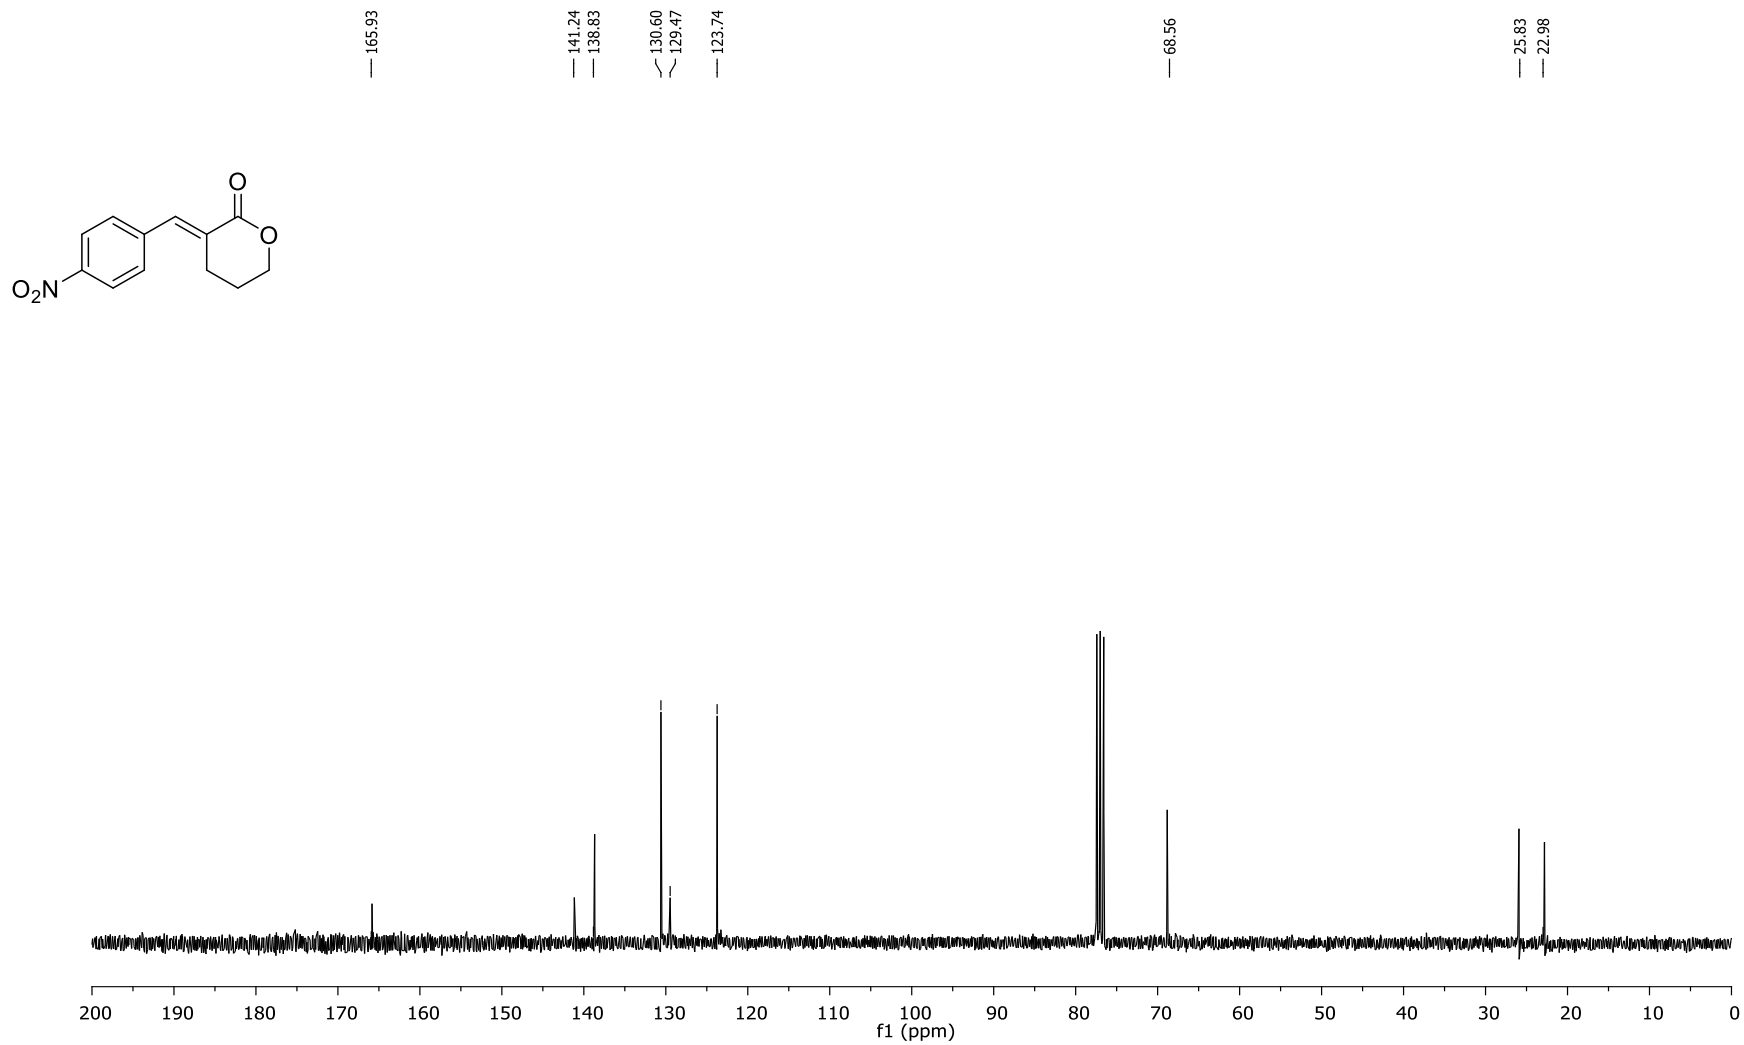

S2.49.  $^1\text{H}$  NMR spectrum of **20** in  $\text{CDCl}_3$ .

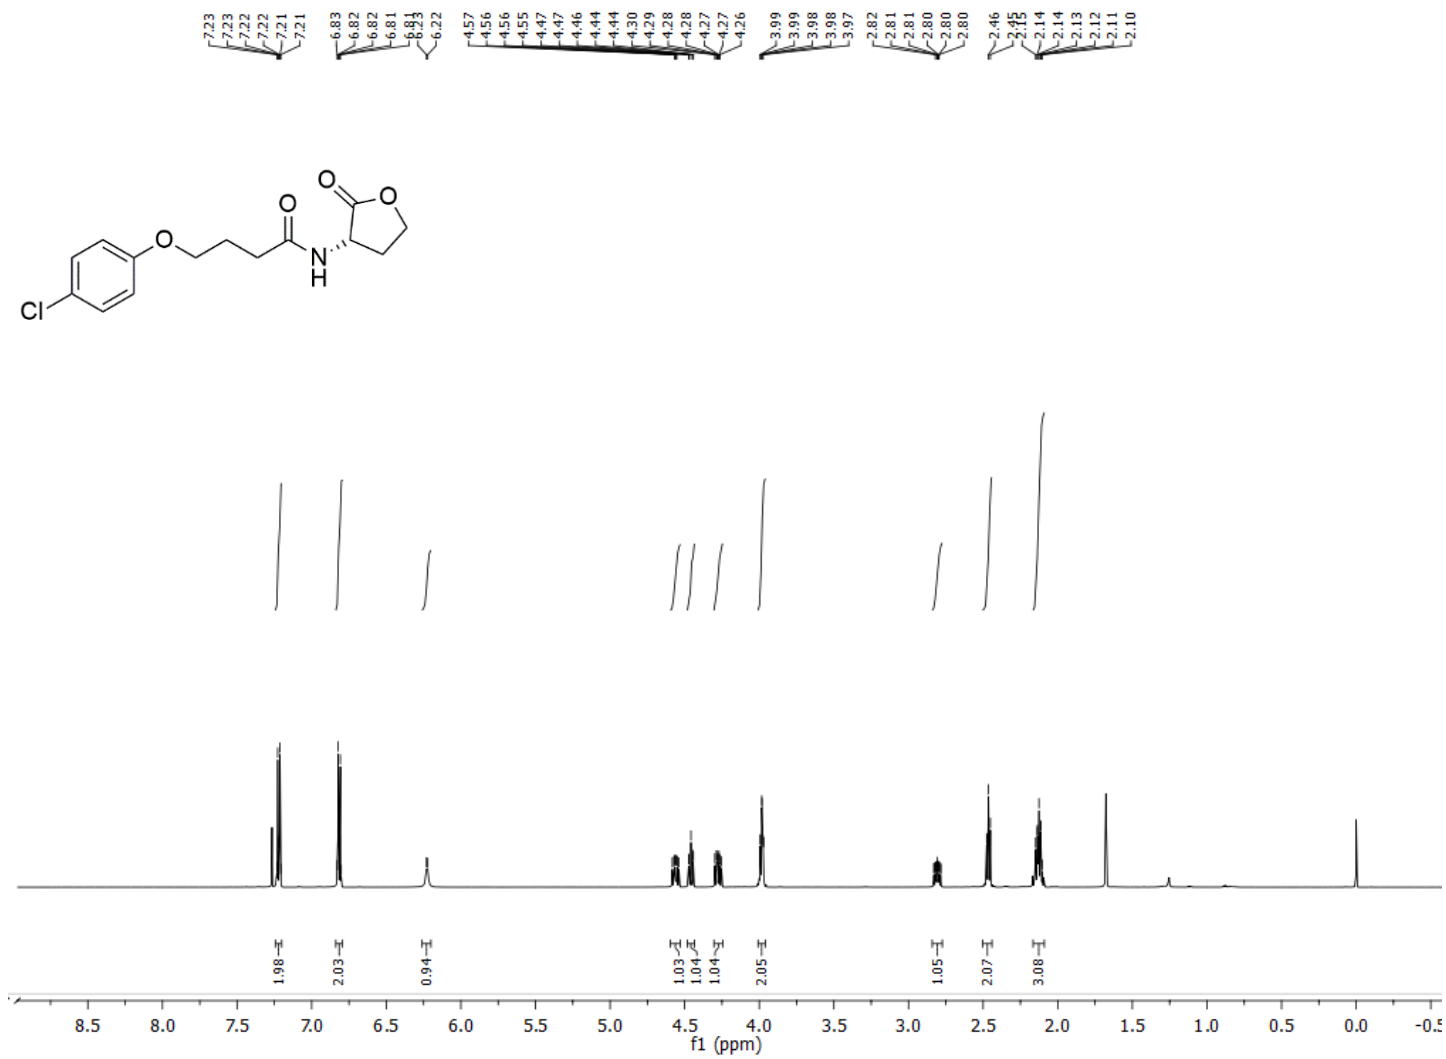



S2.50.  $^{13}\text{C}$  NMR spectrum of **20** in  $\text{CDCl}_3$ .

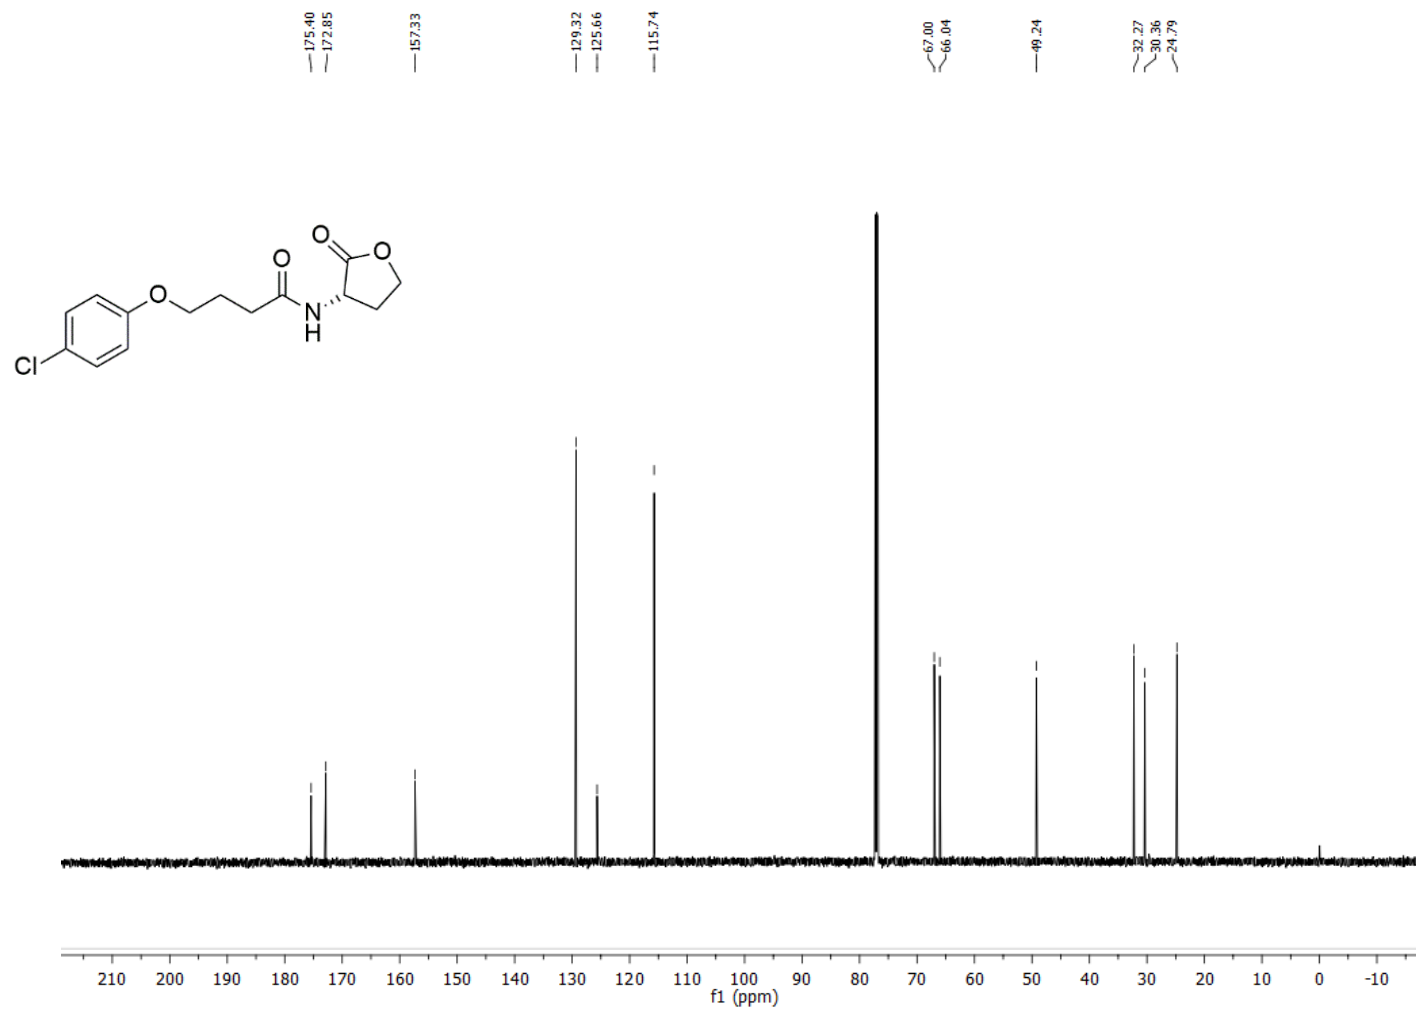

### S3.1. IR (ATR) spectrum of 10E.

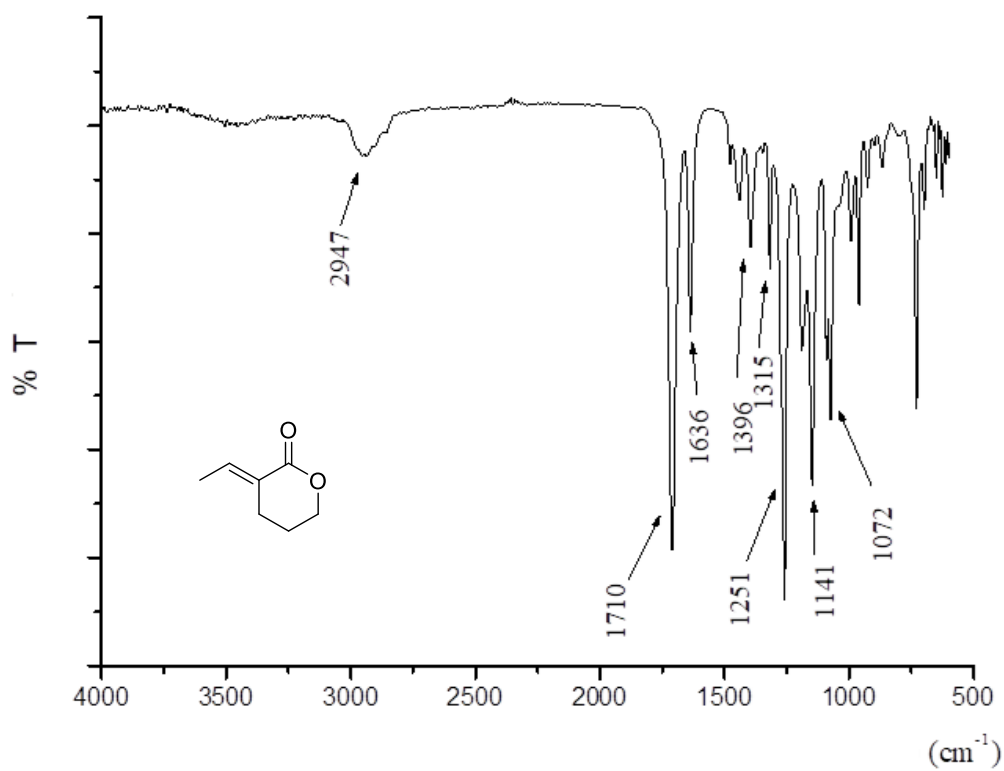

### S3.2. IR (ATR) spectrum of 10Z.

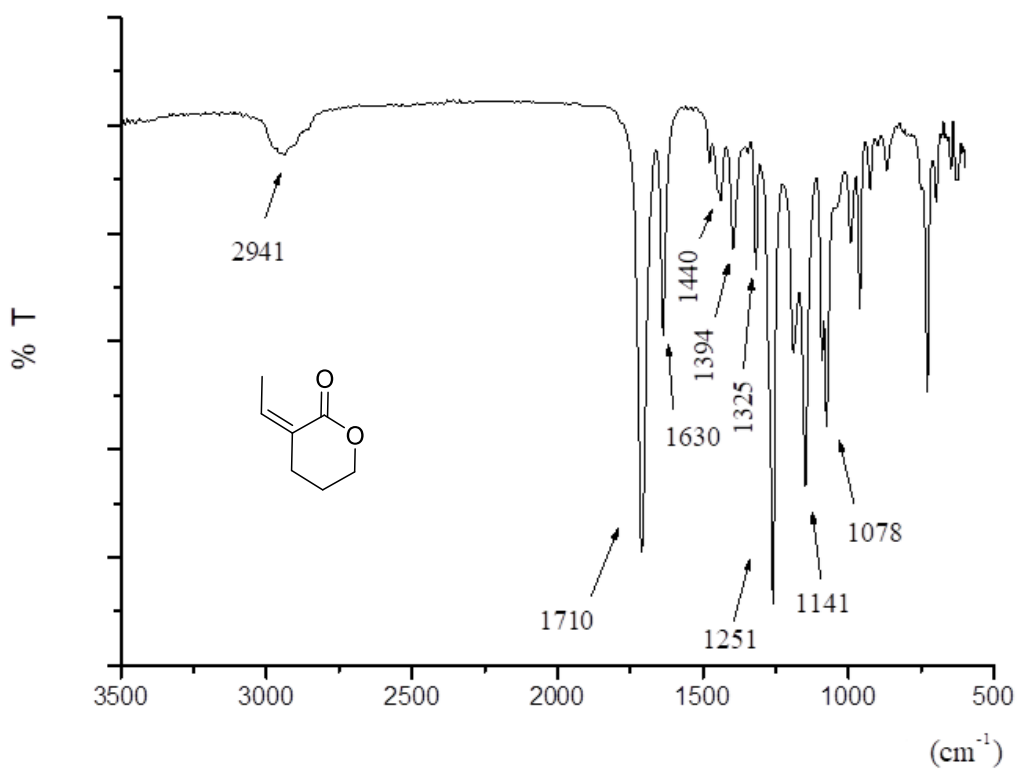

### S3.3. IR (ATR) spectrum of 11E.

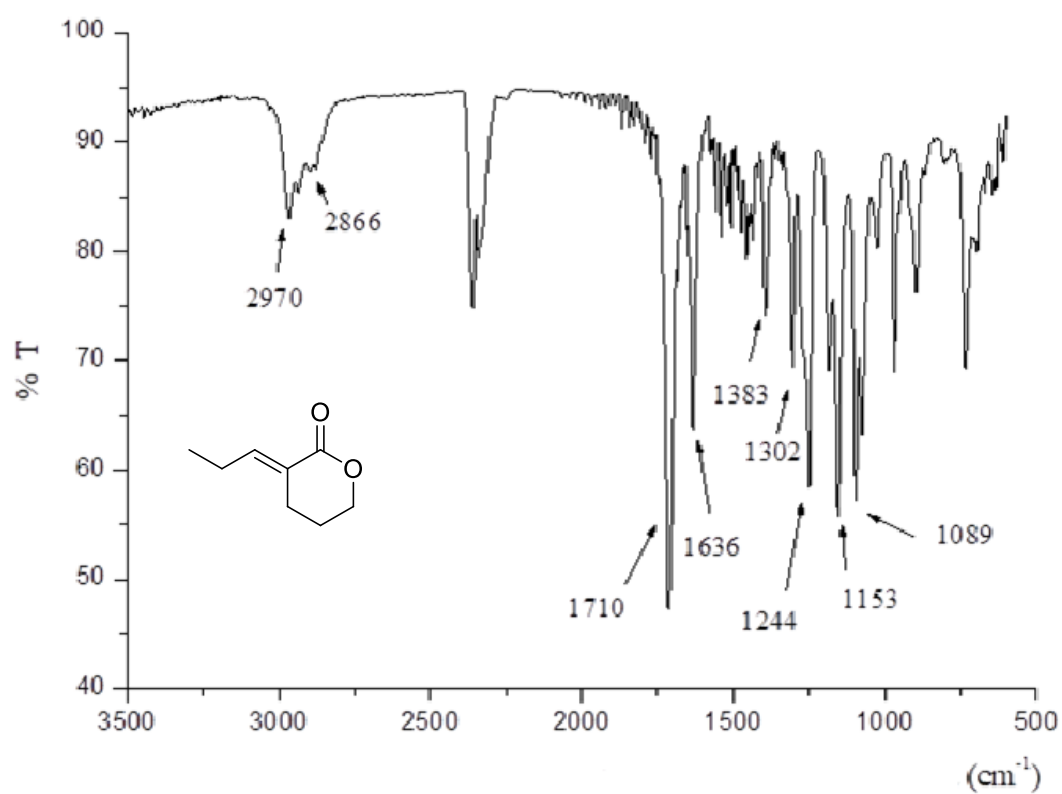

### S3.4. IR (ATR) spectrum of 11Z

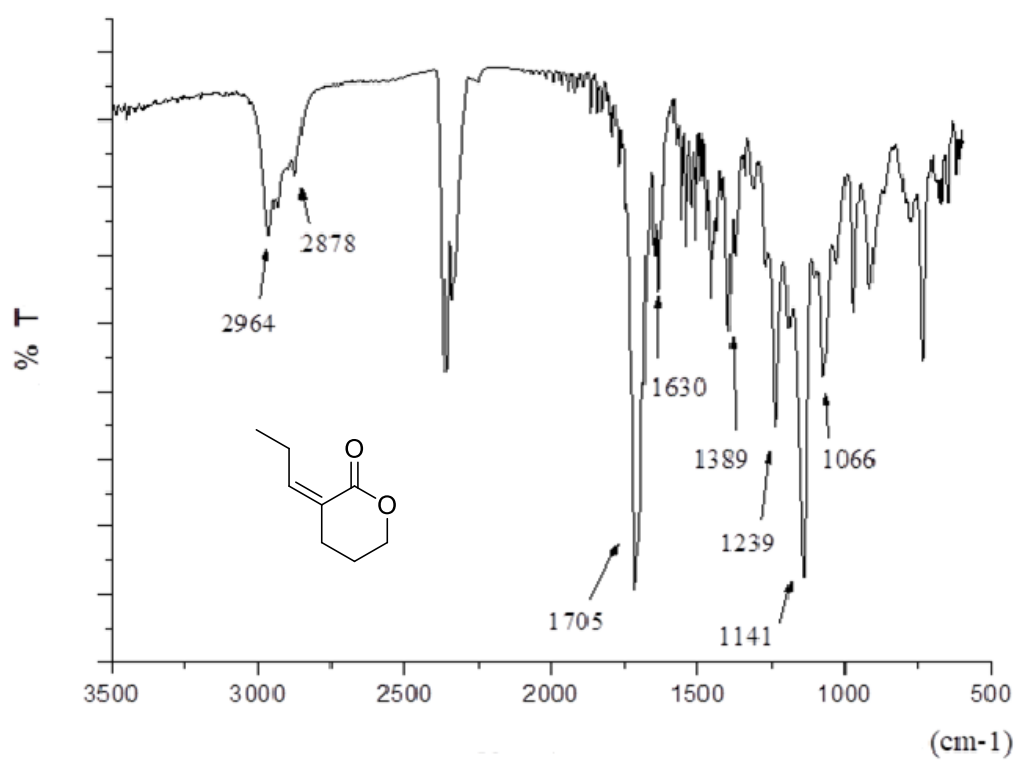

### S3.5. IR (ATR) spectrum of 12E.

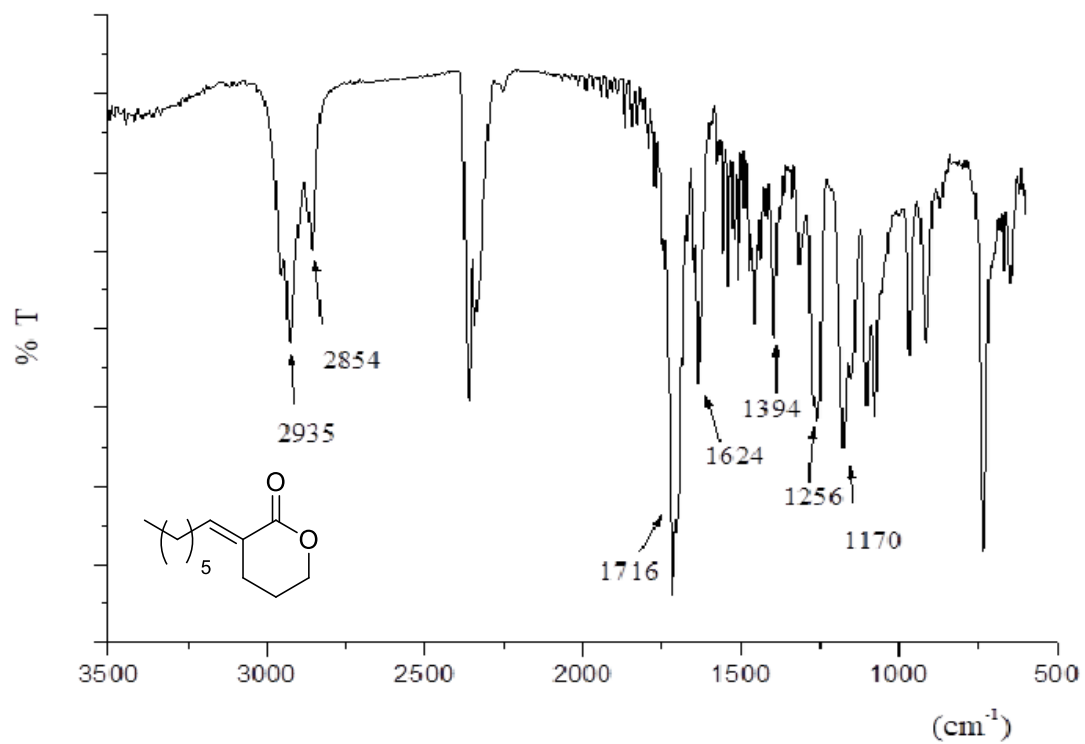

### S3.6. IR (ATR) spectrum of 12Z.

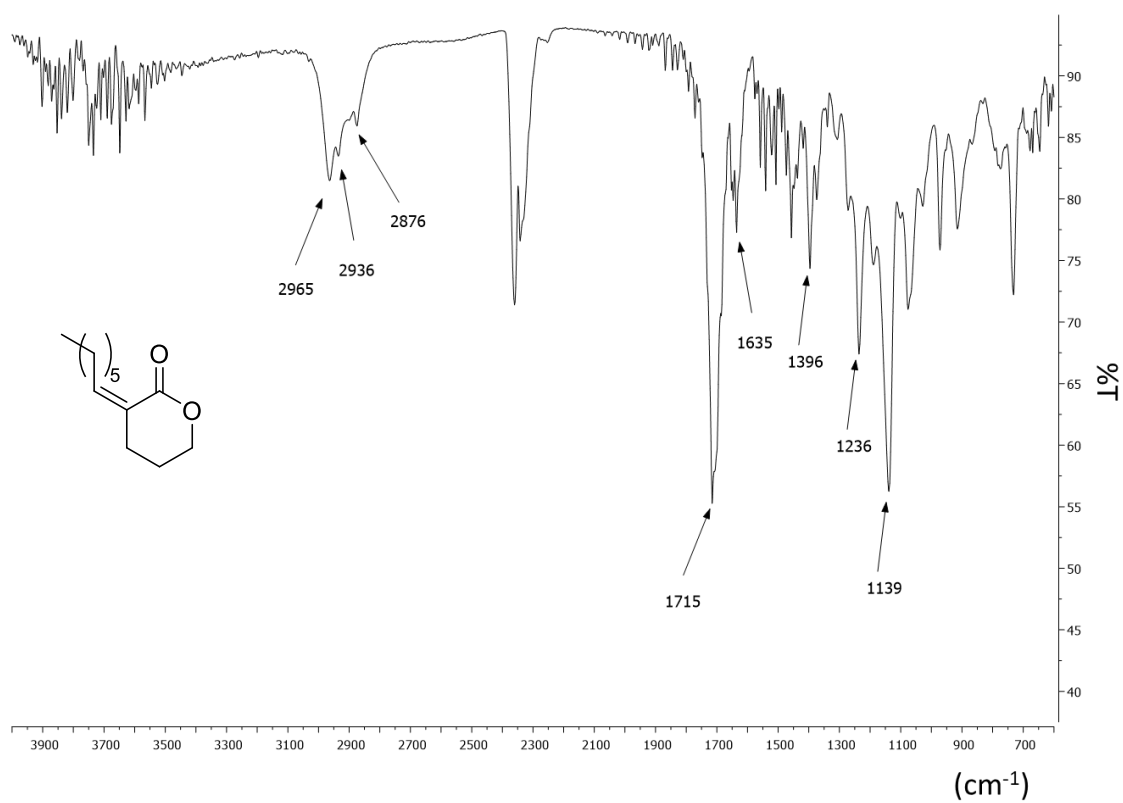

**S3.7. IR (ATR) spectrum of 13E.**

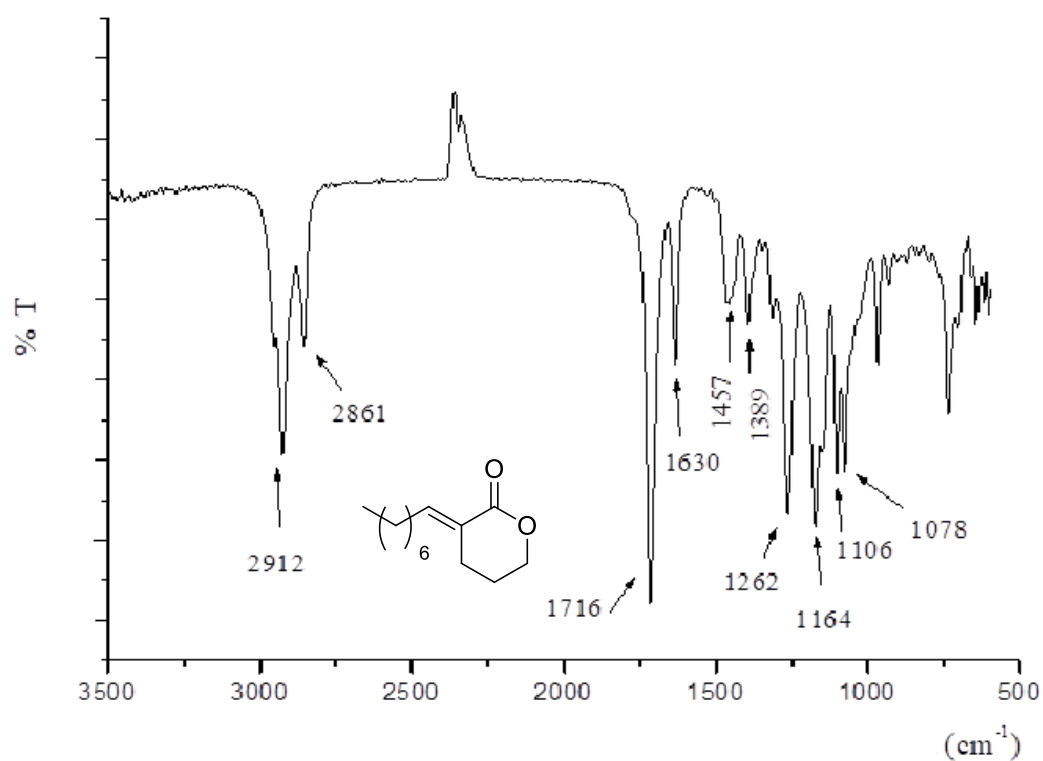

**S3.8. IR (ATR) spectrum of 13Z.**

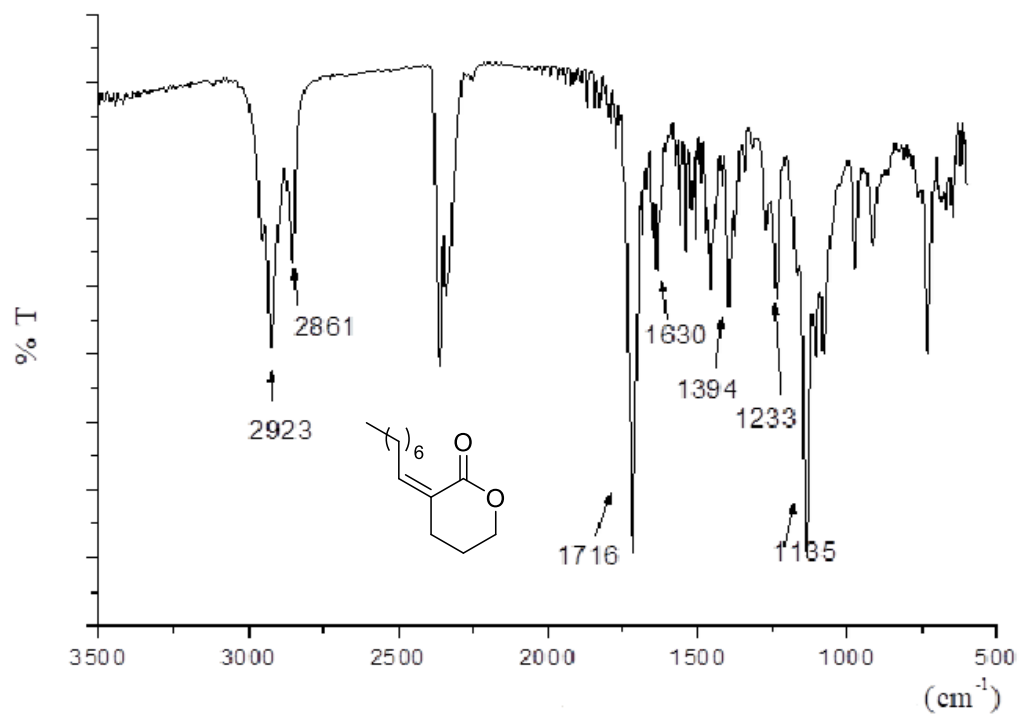

**S3.9. IR (ATR) spectrum of 14E.**

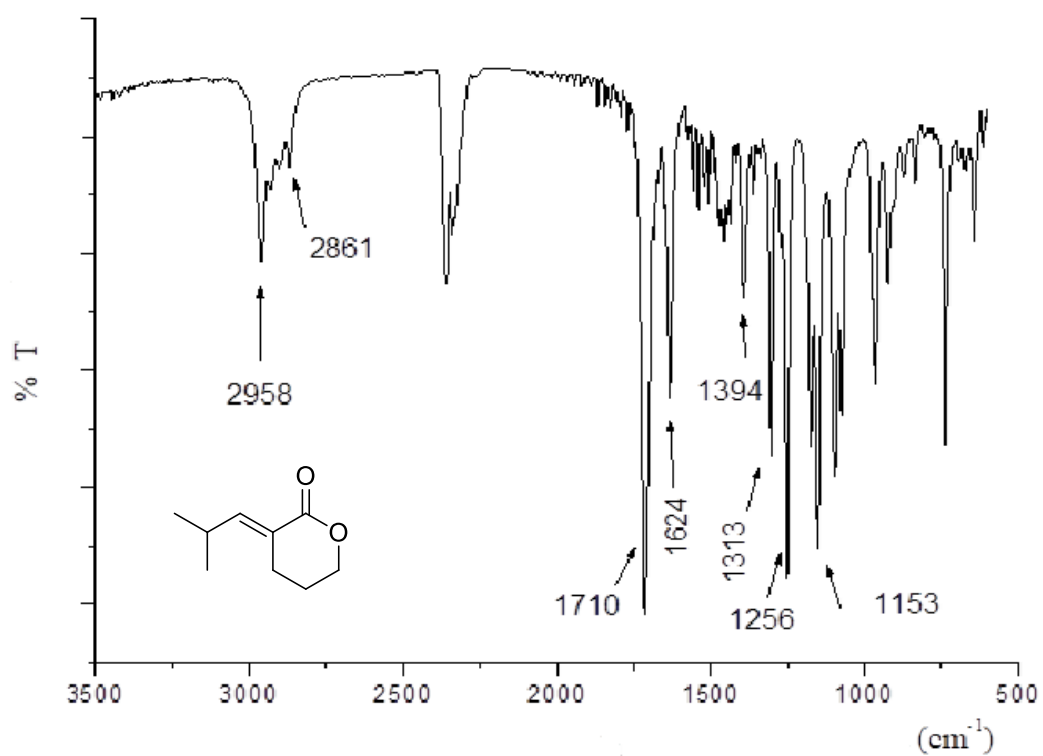

**S3.10. IR (ATR) spectrum of 15E.**

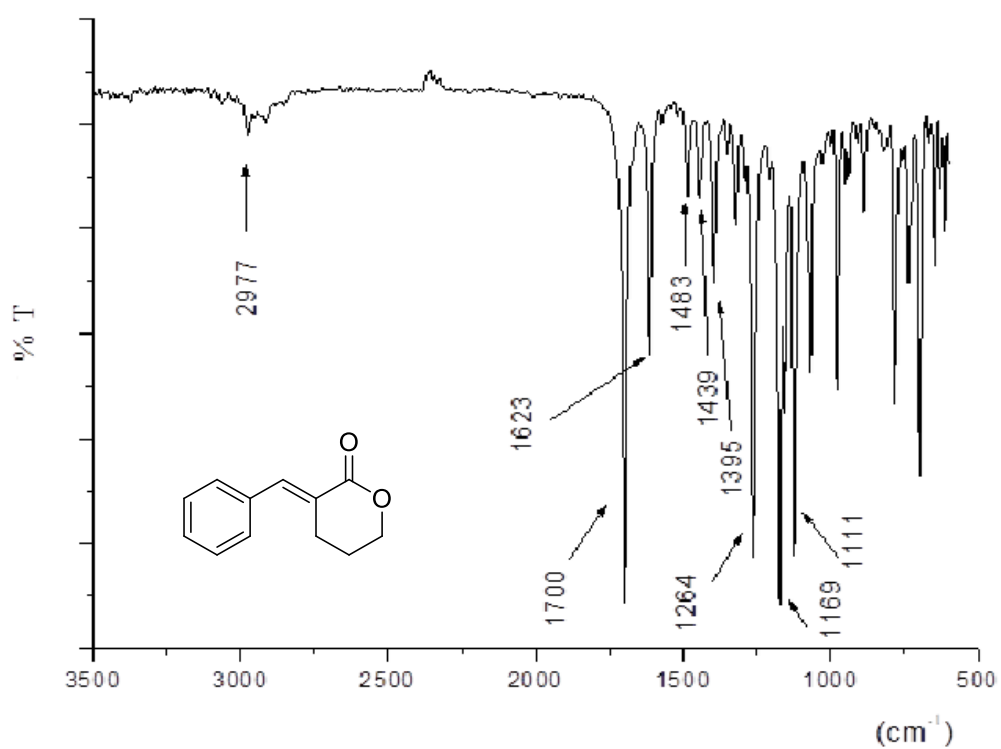

**S3.11. IR (ATR) spectrum of 16E.**

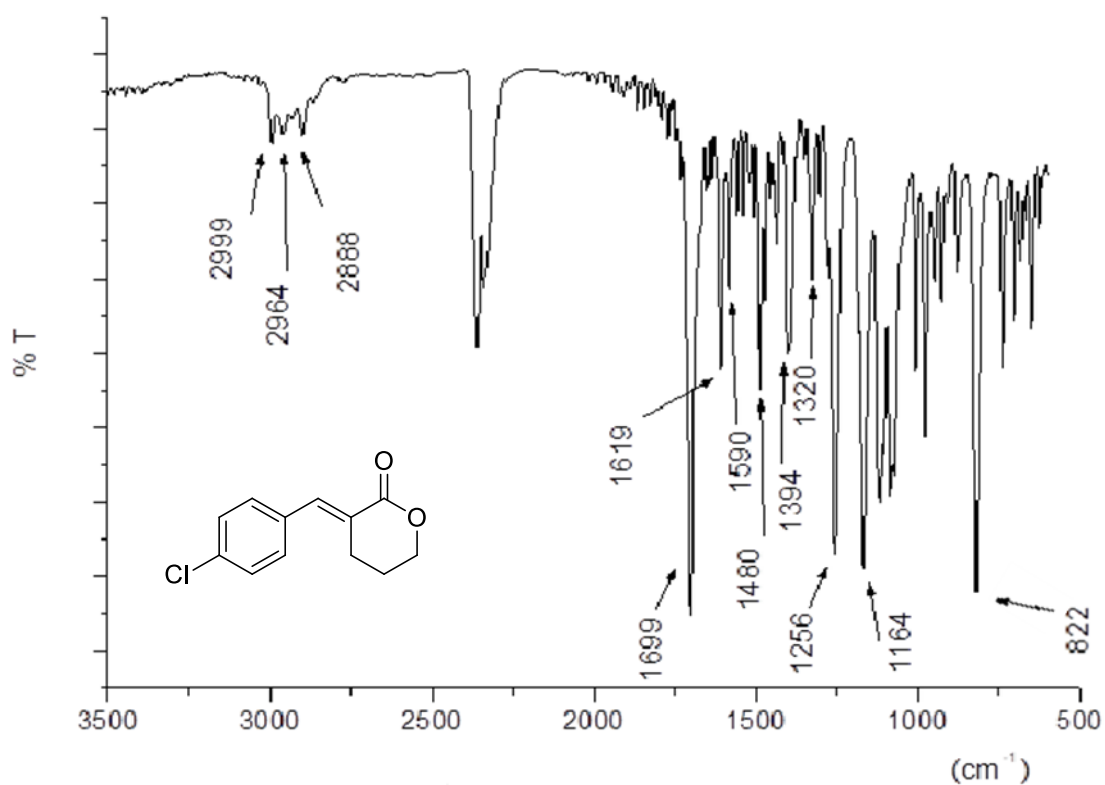

**S3.12. IR (ATR) spectrum of 17E.**

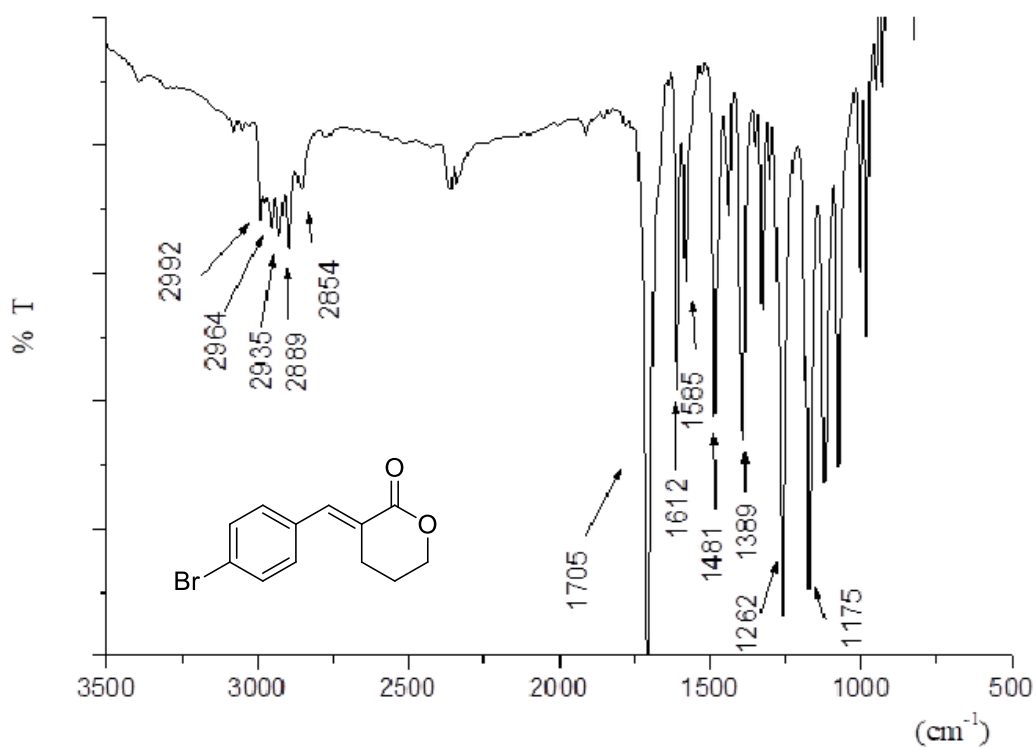

**S3.13. IR (ATR) spectrum of 18E.**

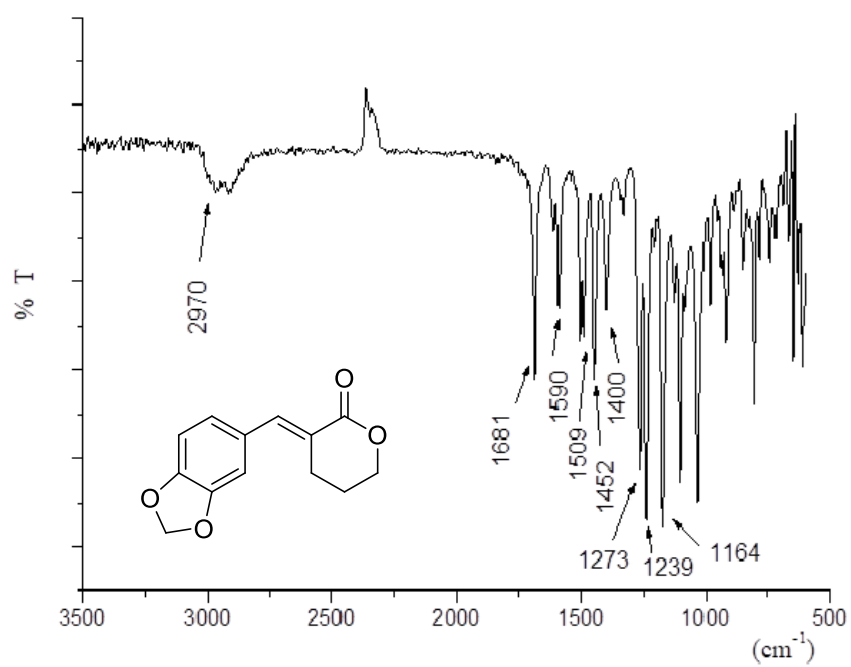

**S3.14. IR (ATR) spectrum of 19E.**

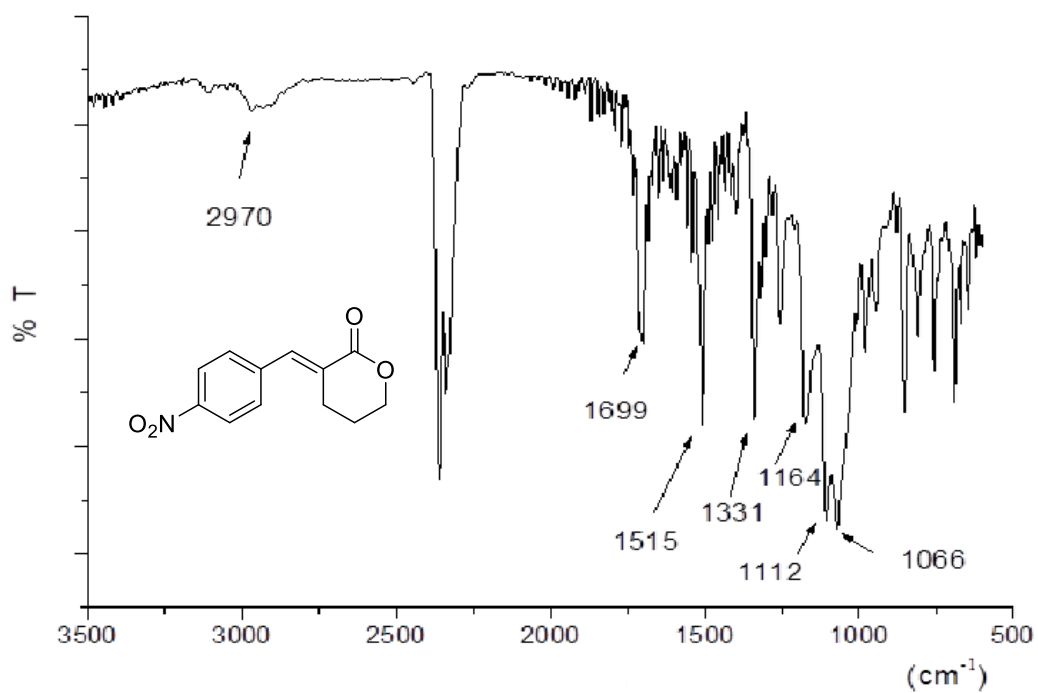



### S3.15. IR (ATR) spectrum of 20.

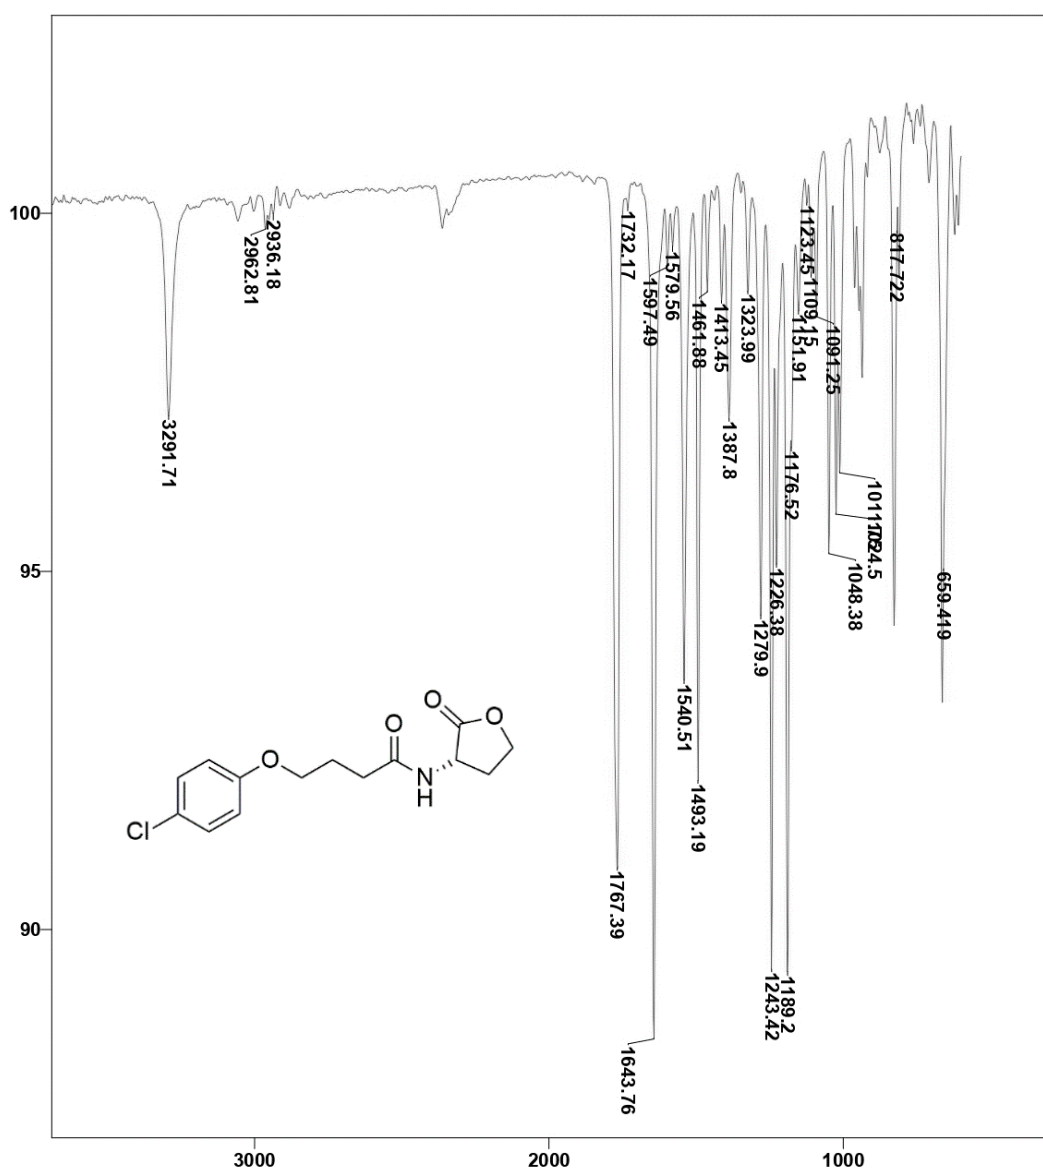

### S4.1. HRMS data of 10E.

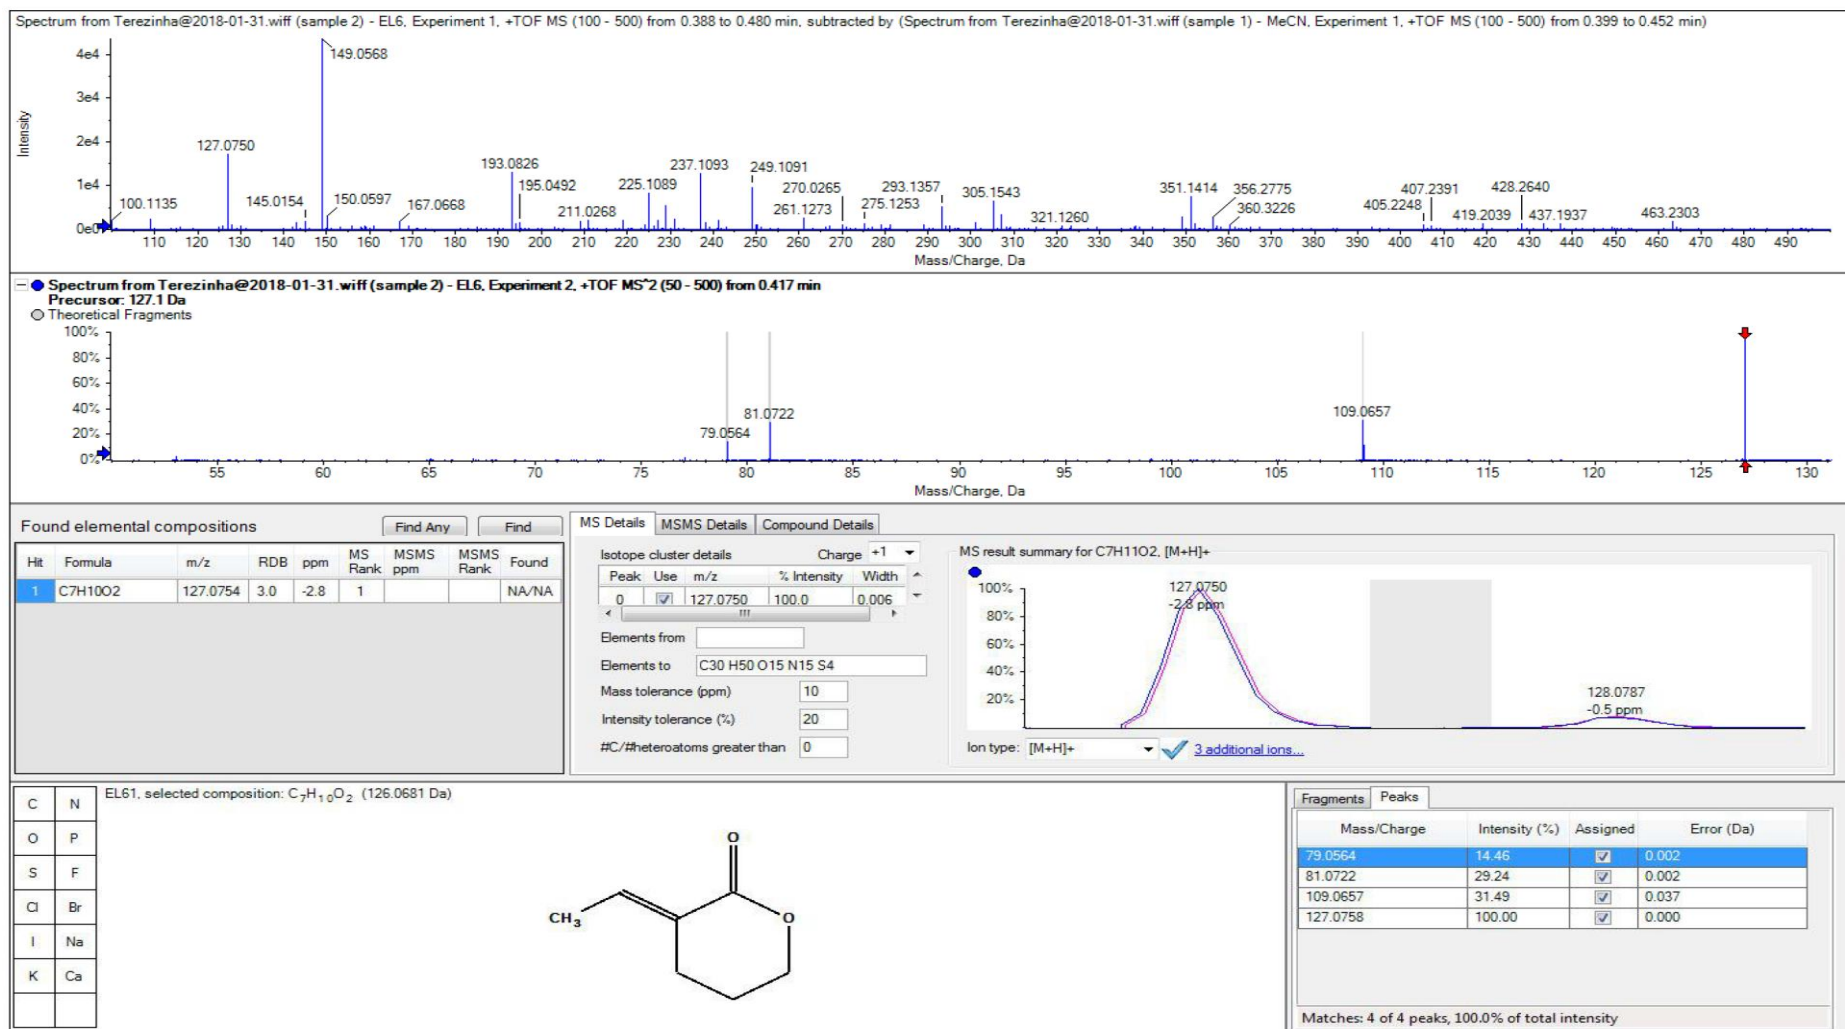

## S4.2. HRMS data of 10Z.

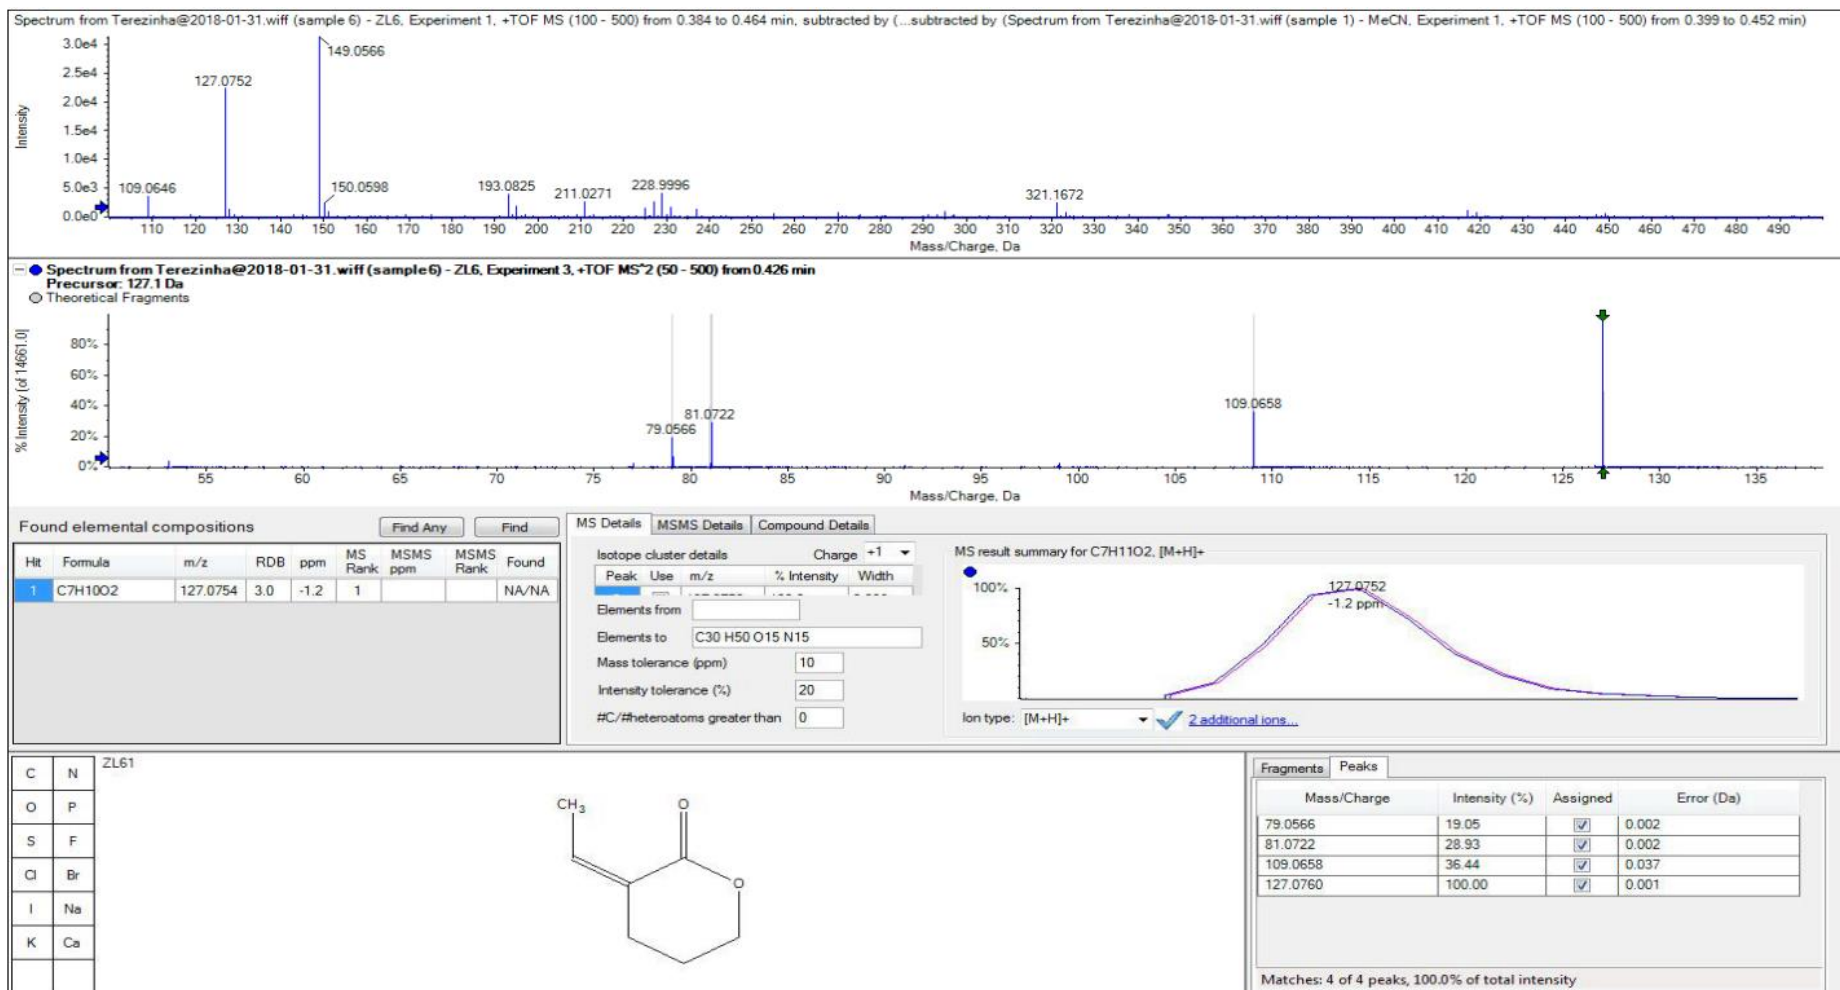

### S4.3. HRMS data of 11E.

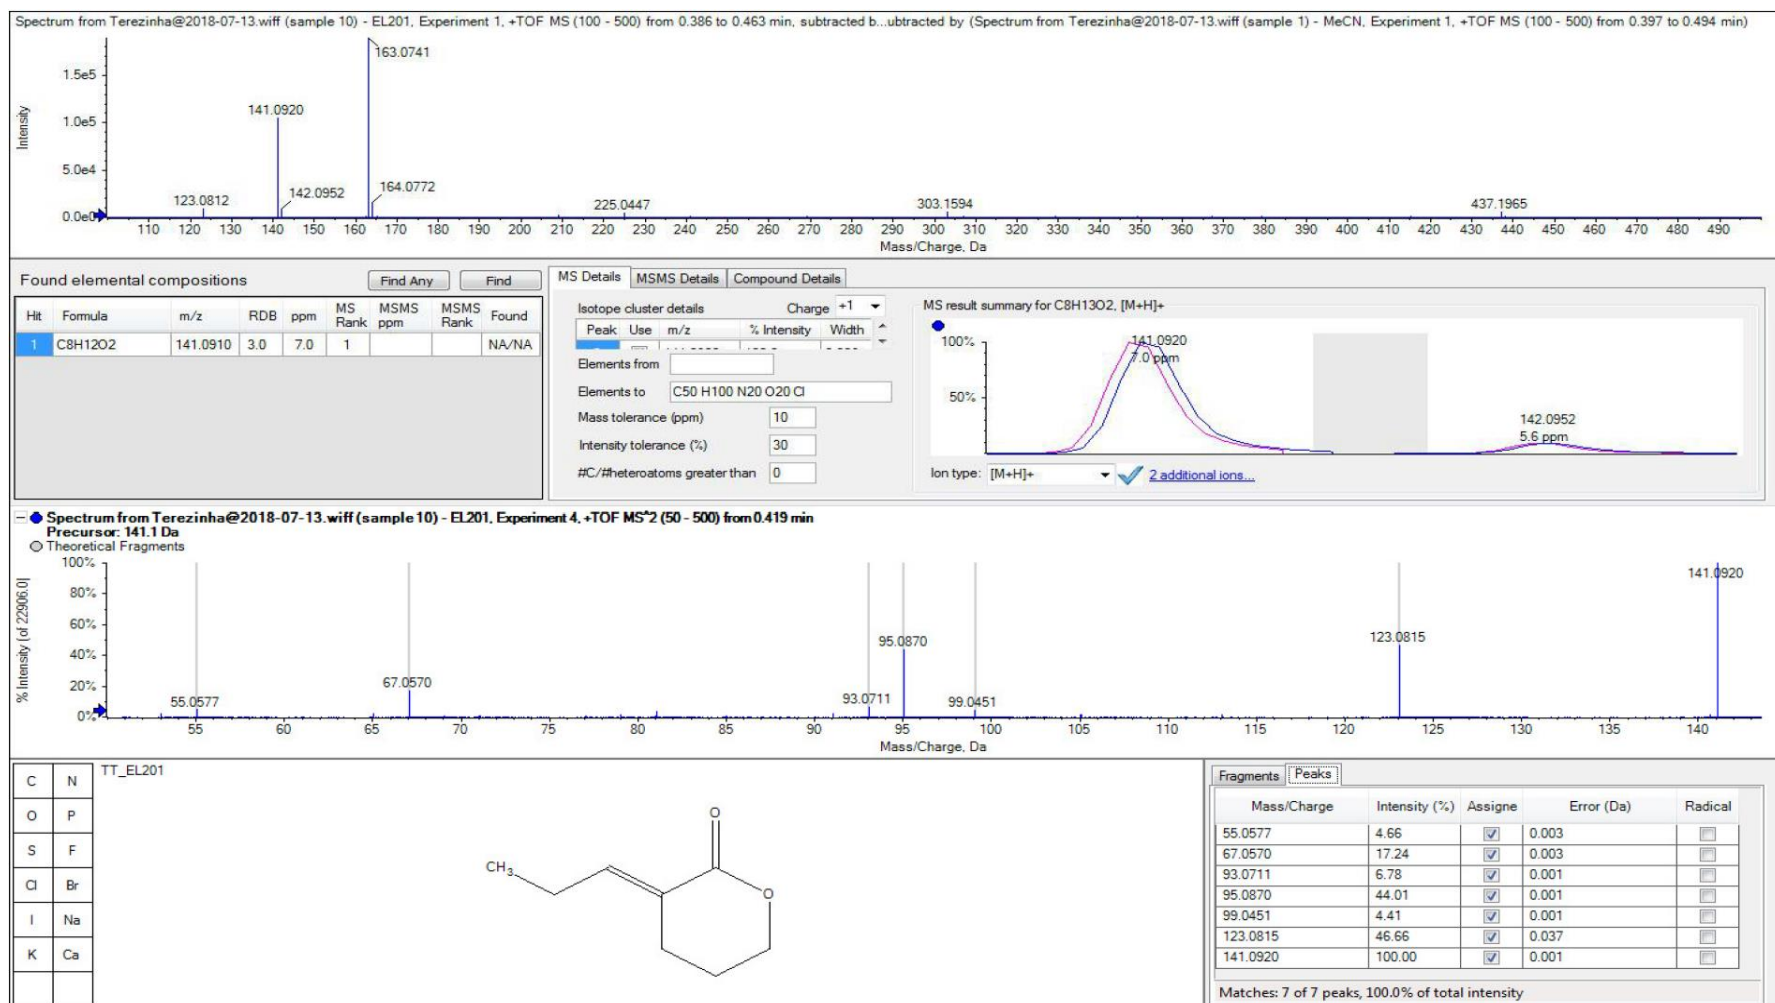

## S4.4. HRMS data of 11Z.

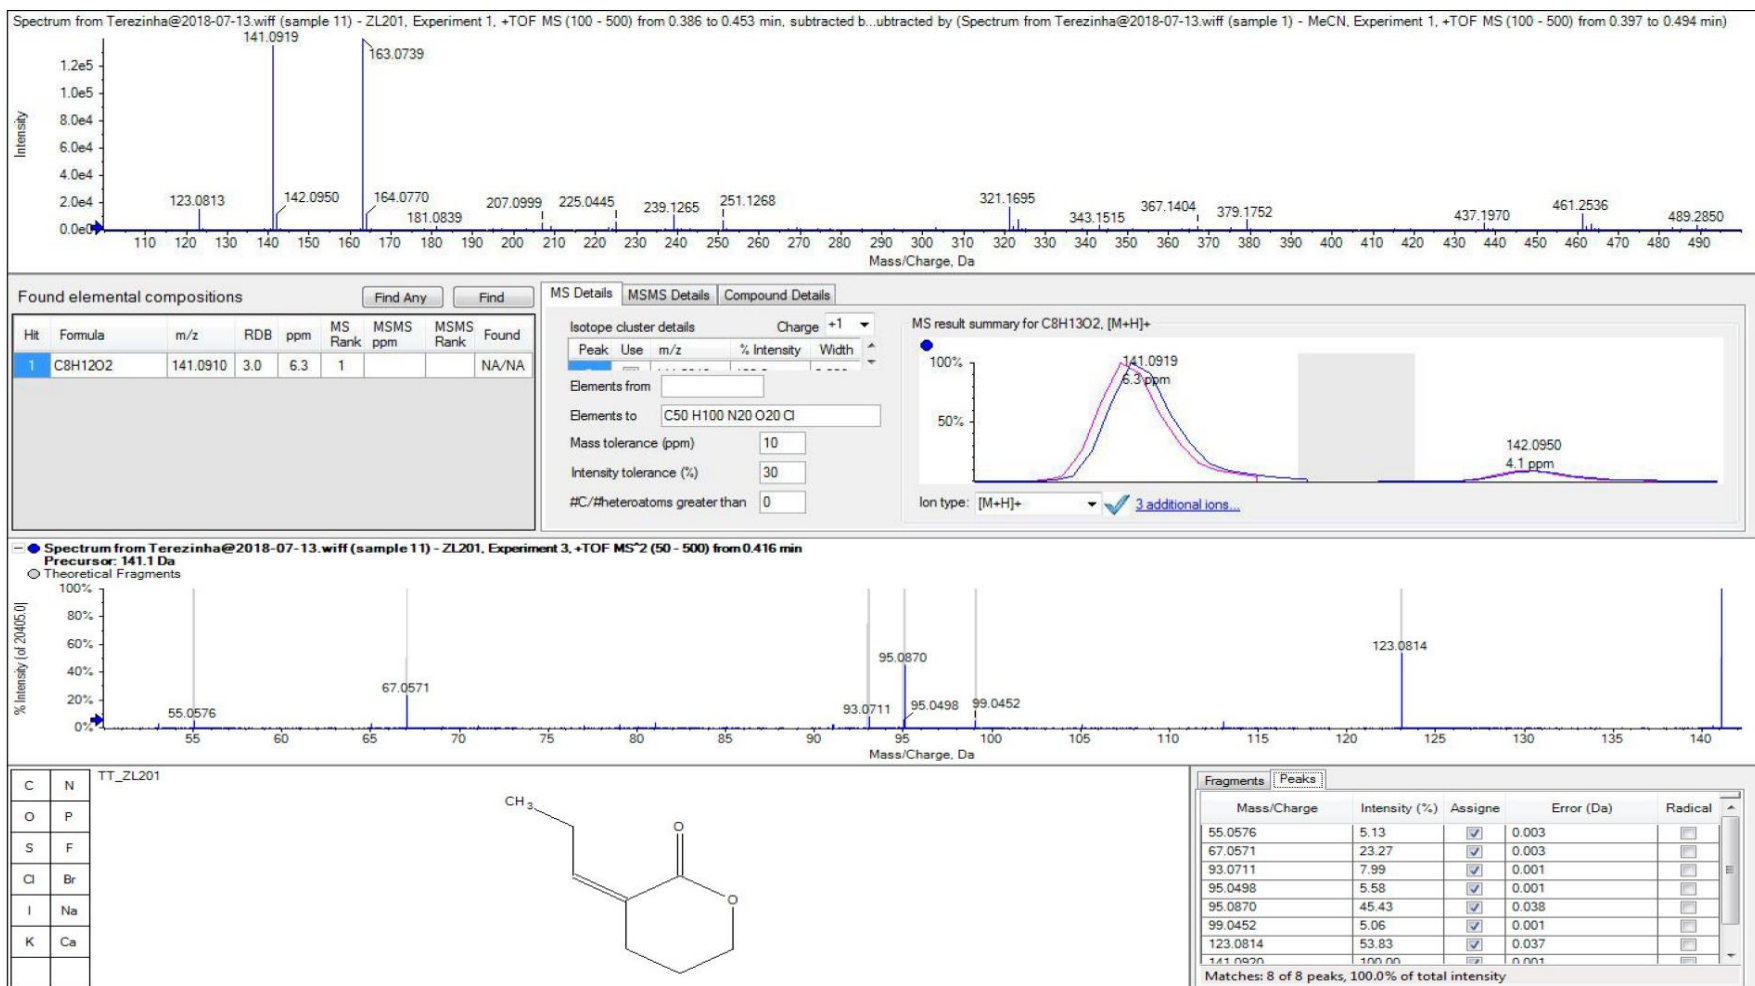

### S4.5. HRMS data of 12E.

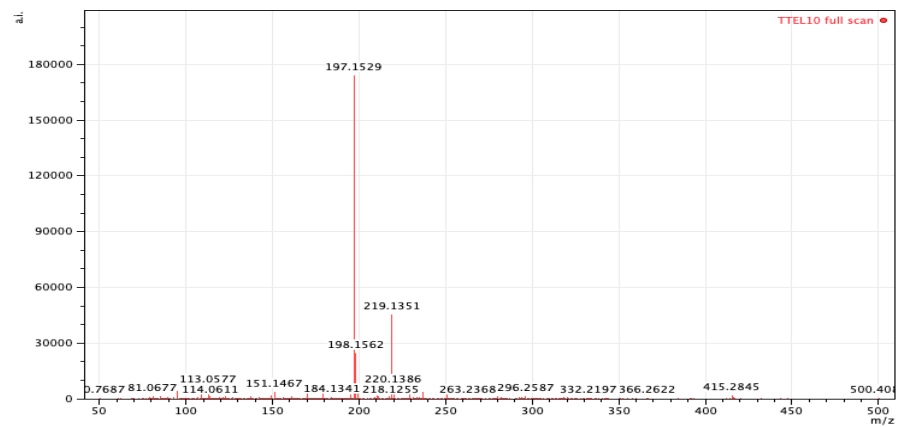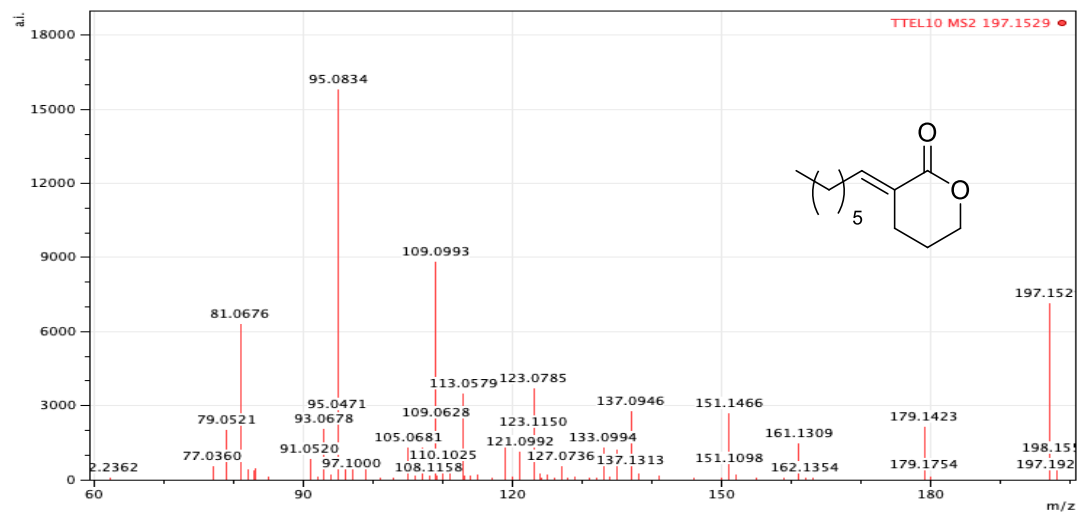





### S4.7. HRMS data of 13E.

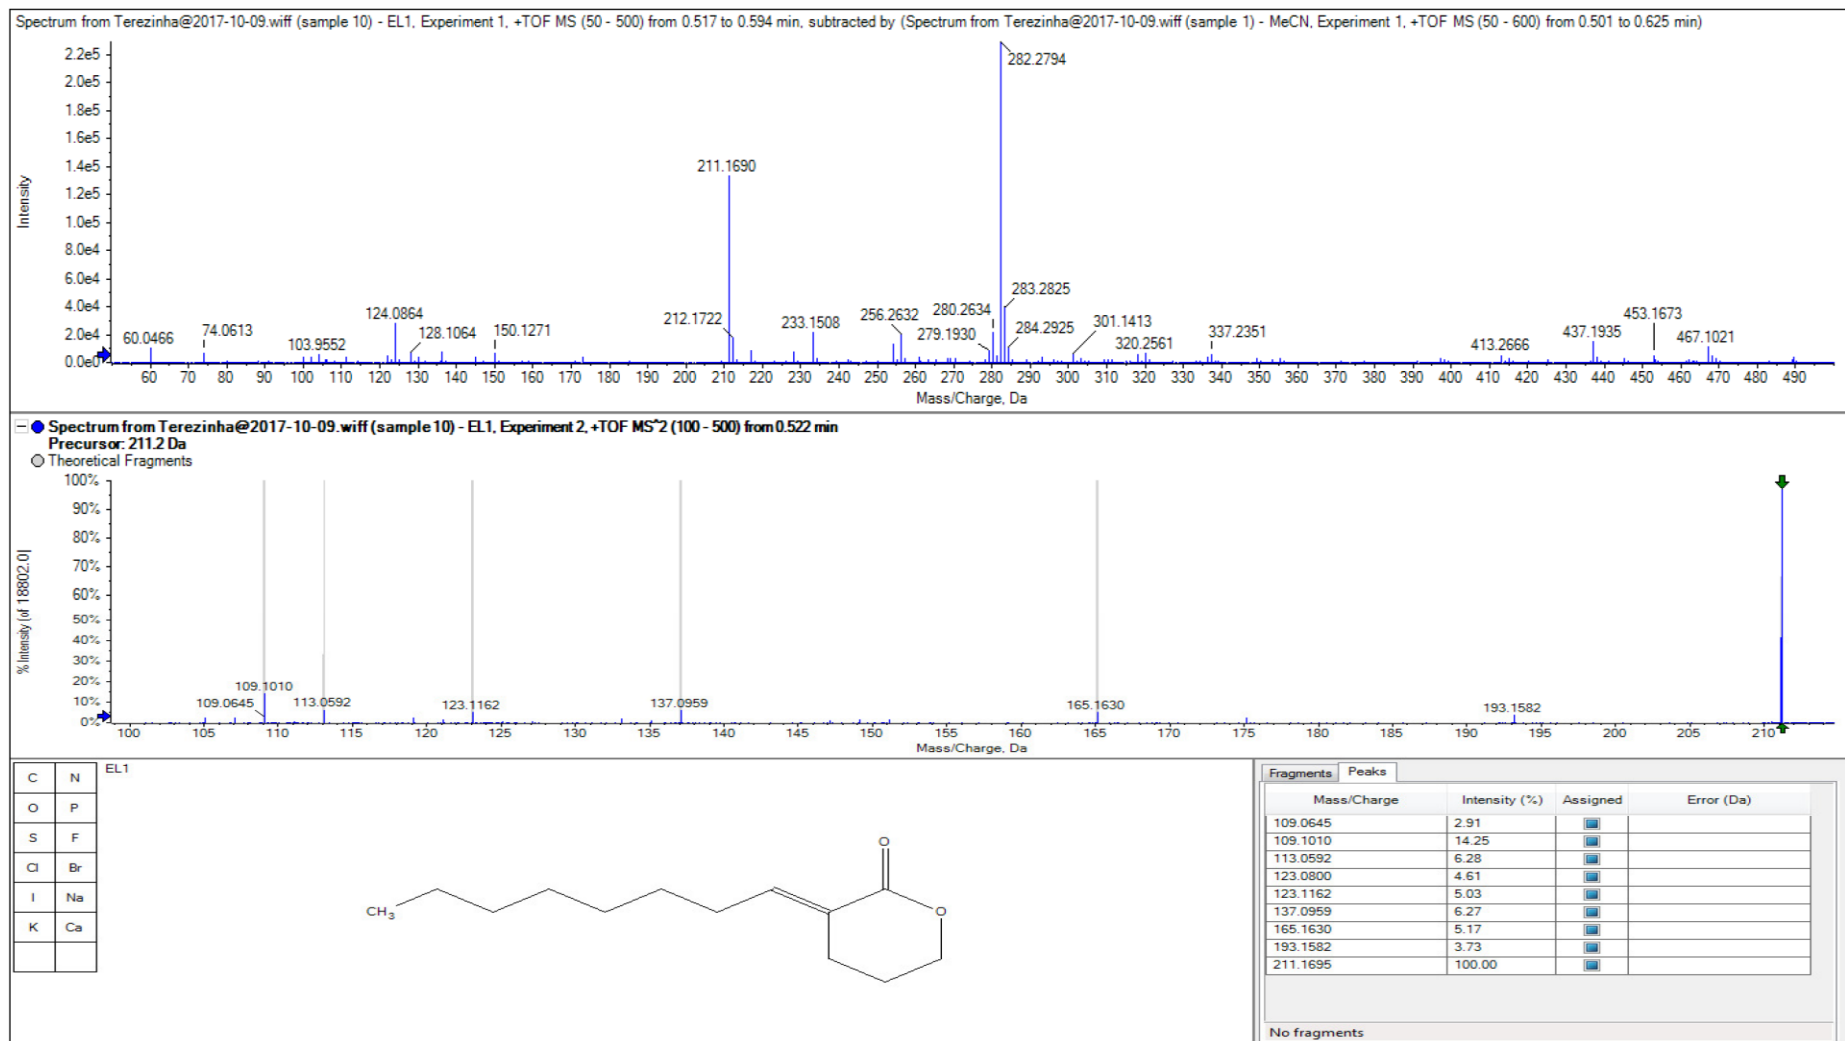



### S4.8. HRMS data of 13Z.

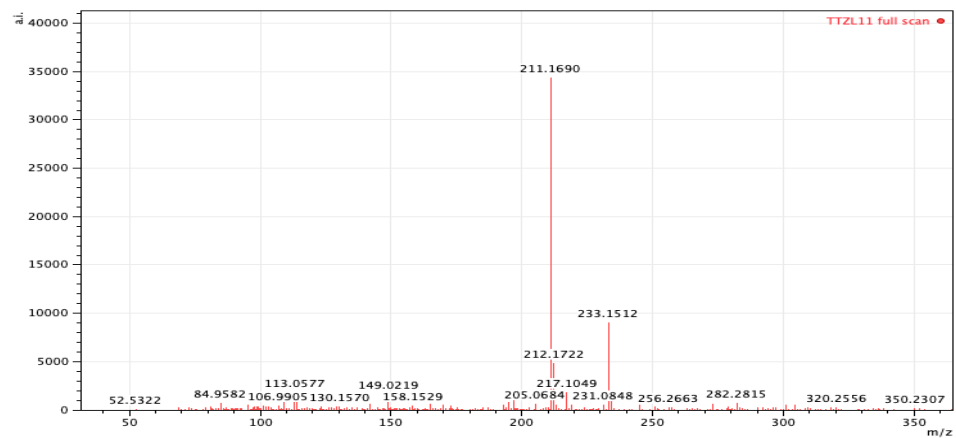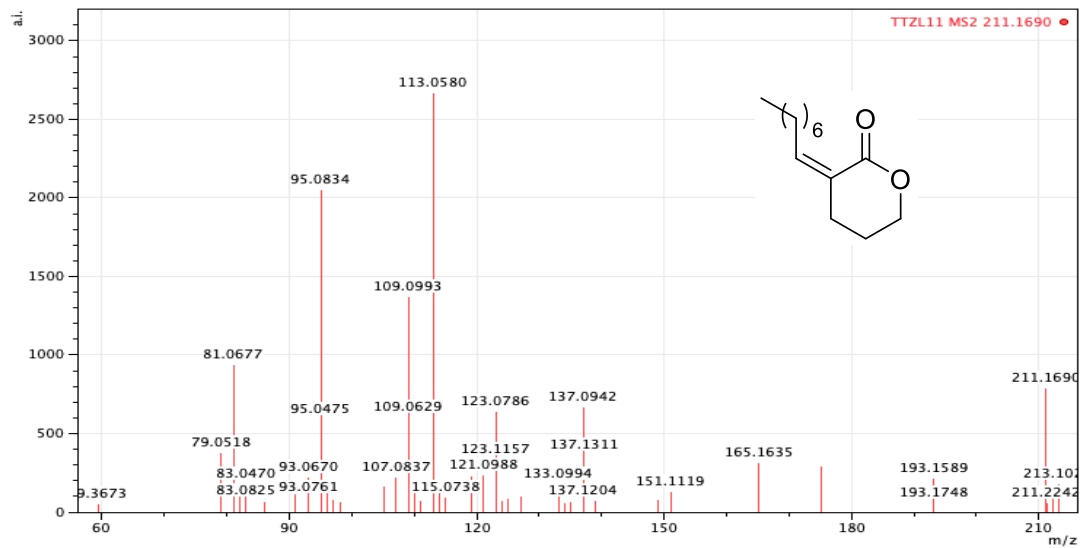

## S4.9. HRMS data of 14E.

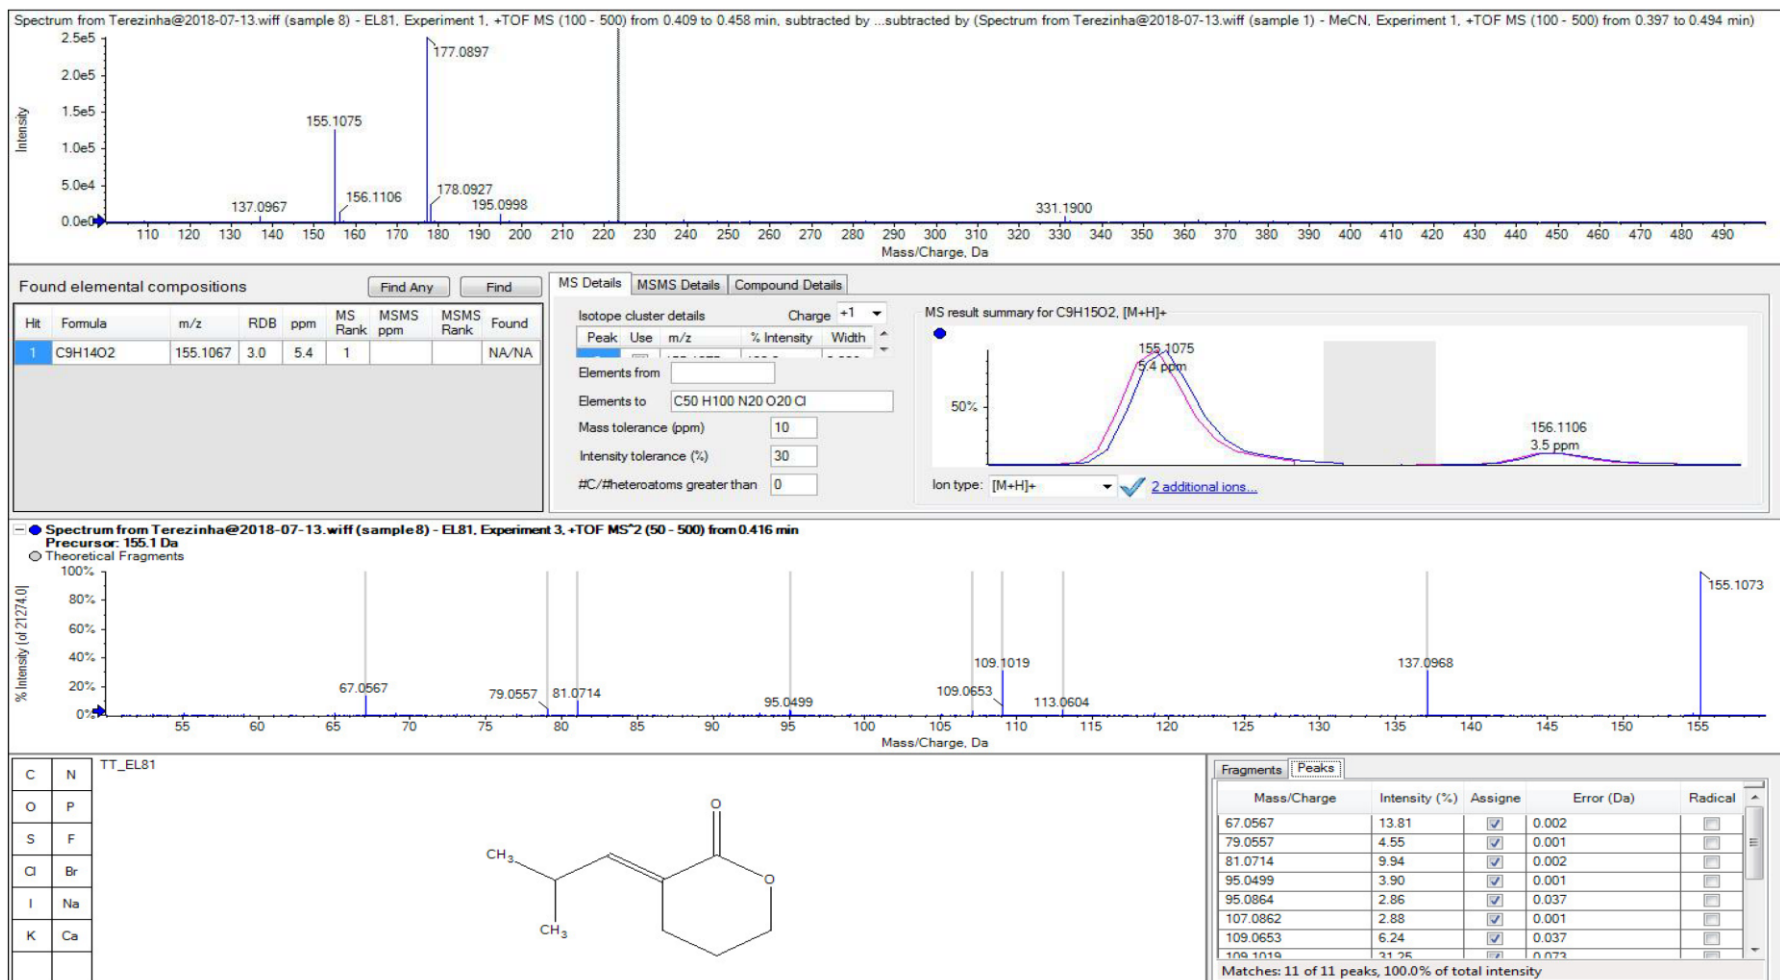

### S4.10. HRMS data of 15E.

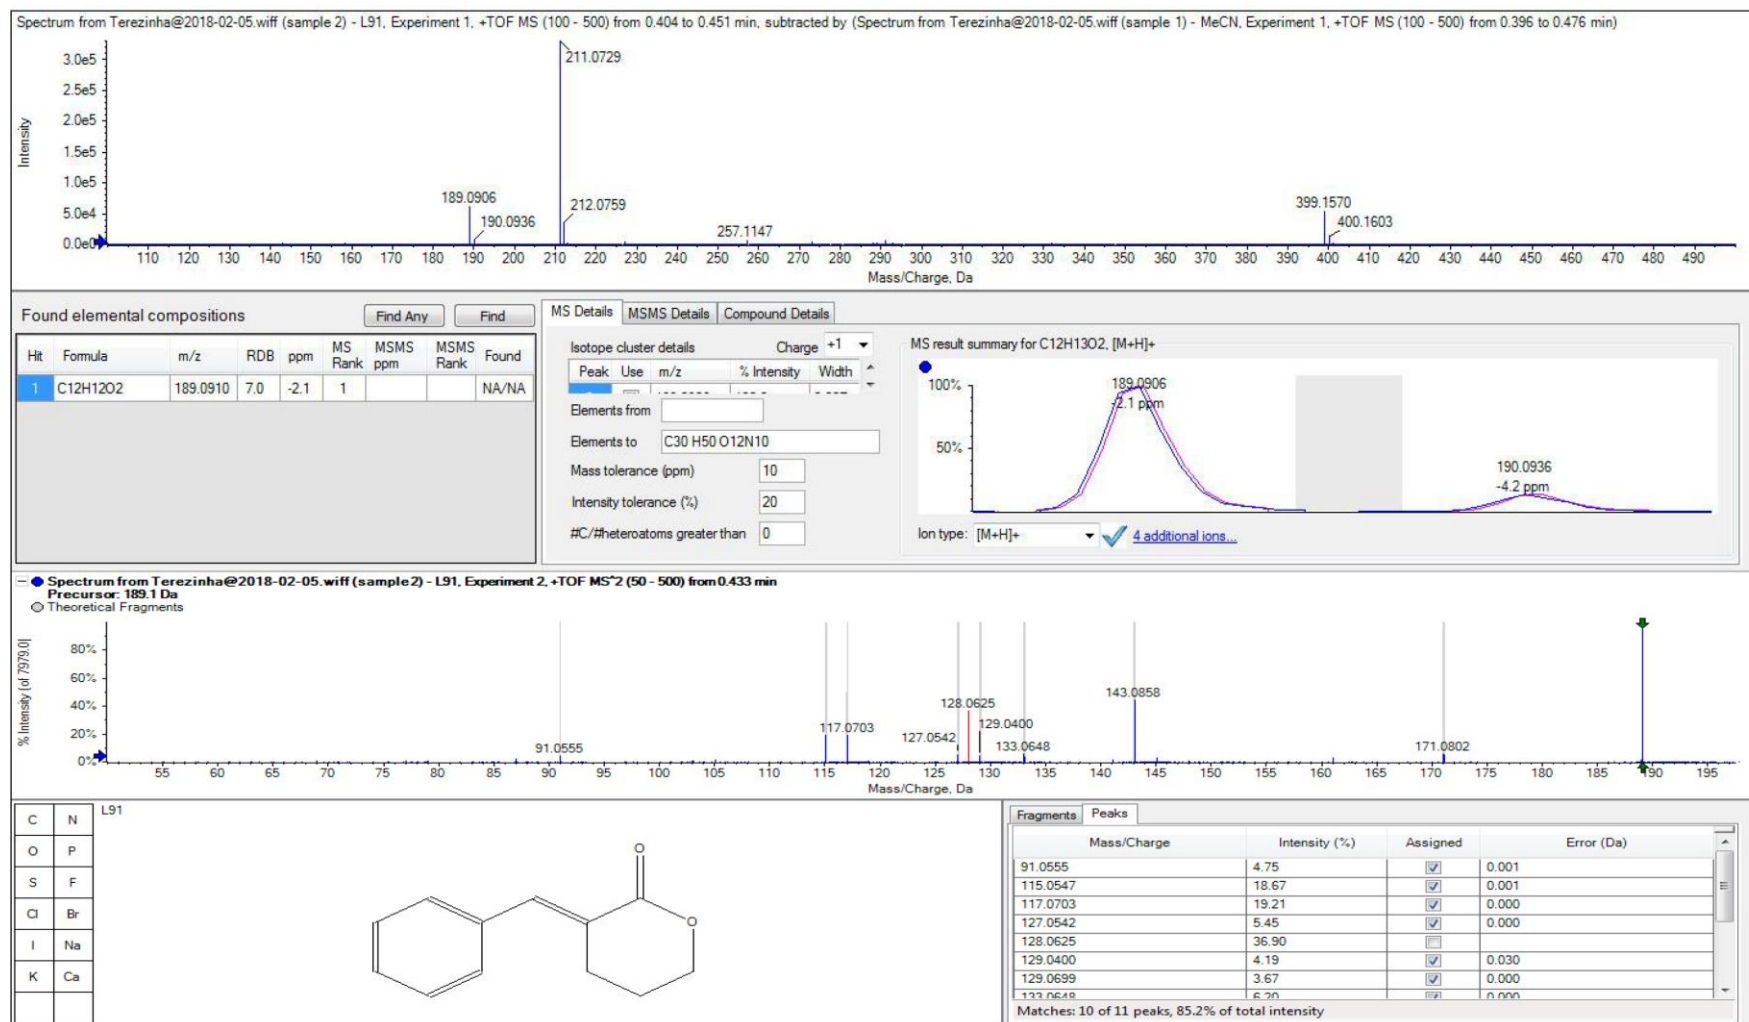

## S4.11. HRMS data of 16E.

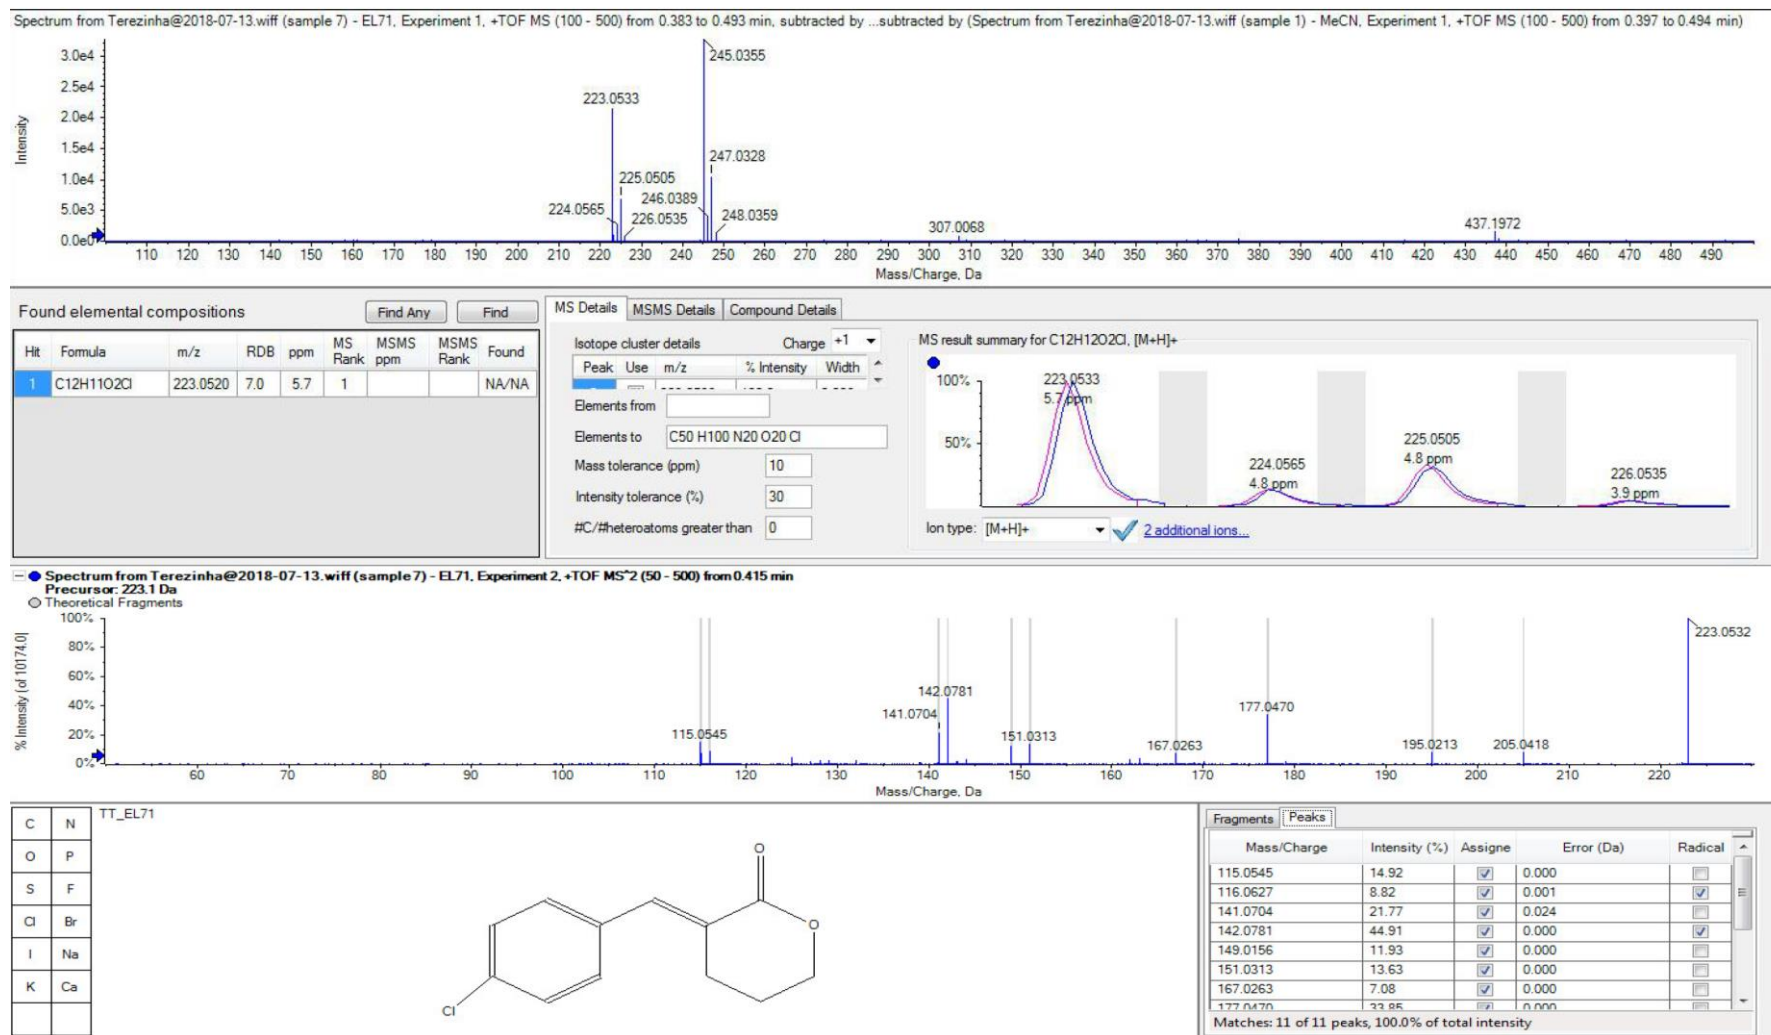

## S4.12. HRMS data of 17E.

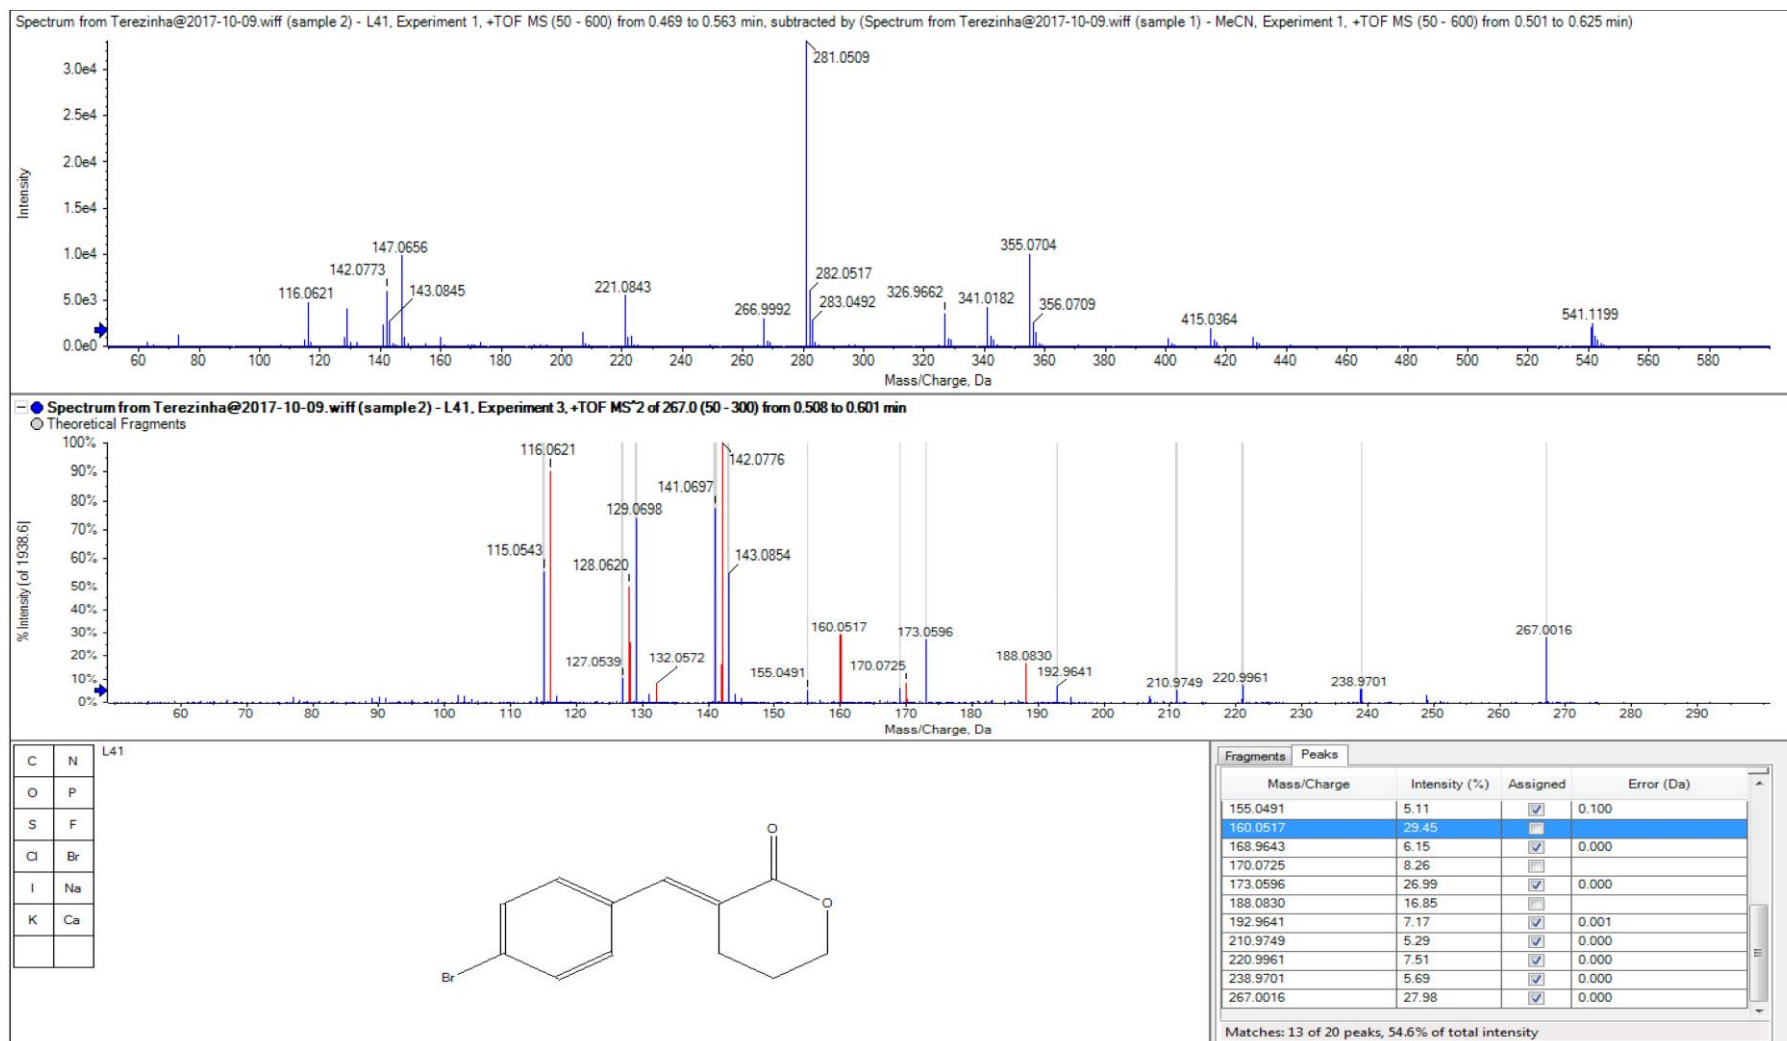

### S4.13. HRMS data of 18E

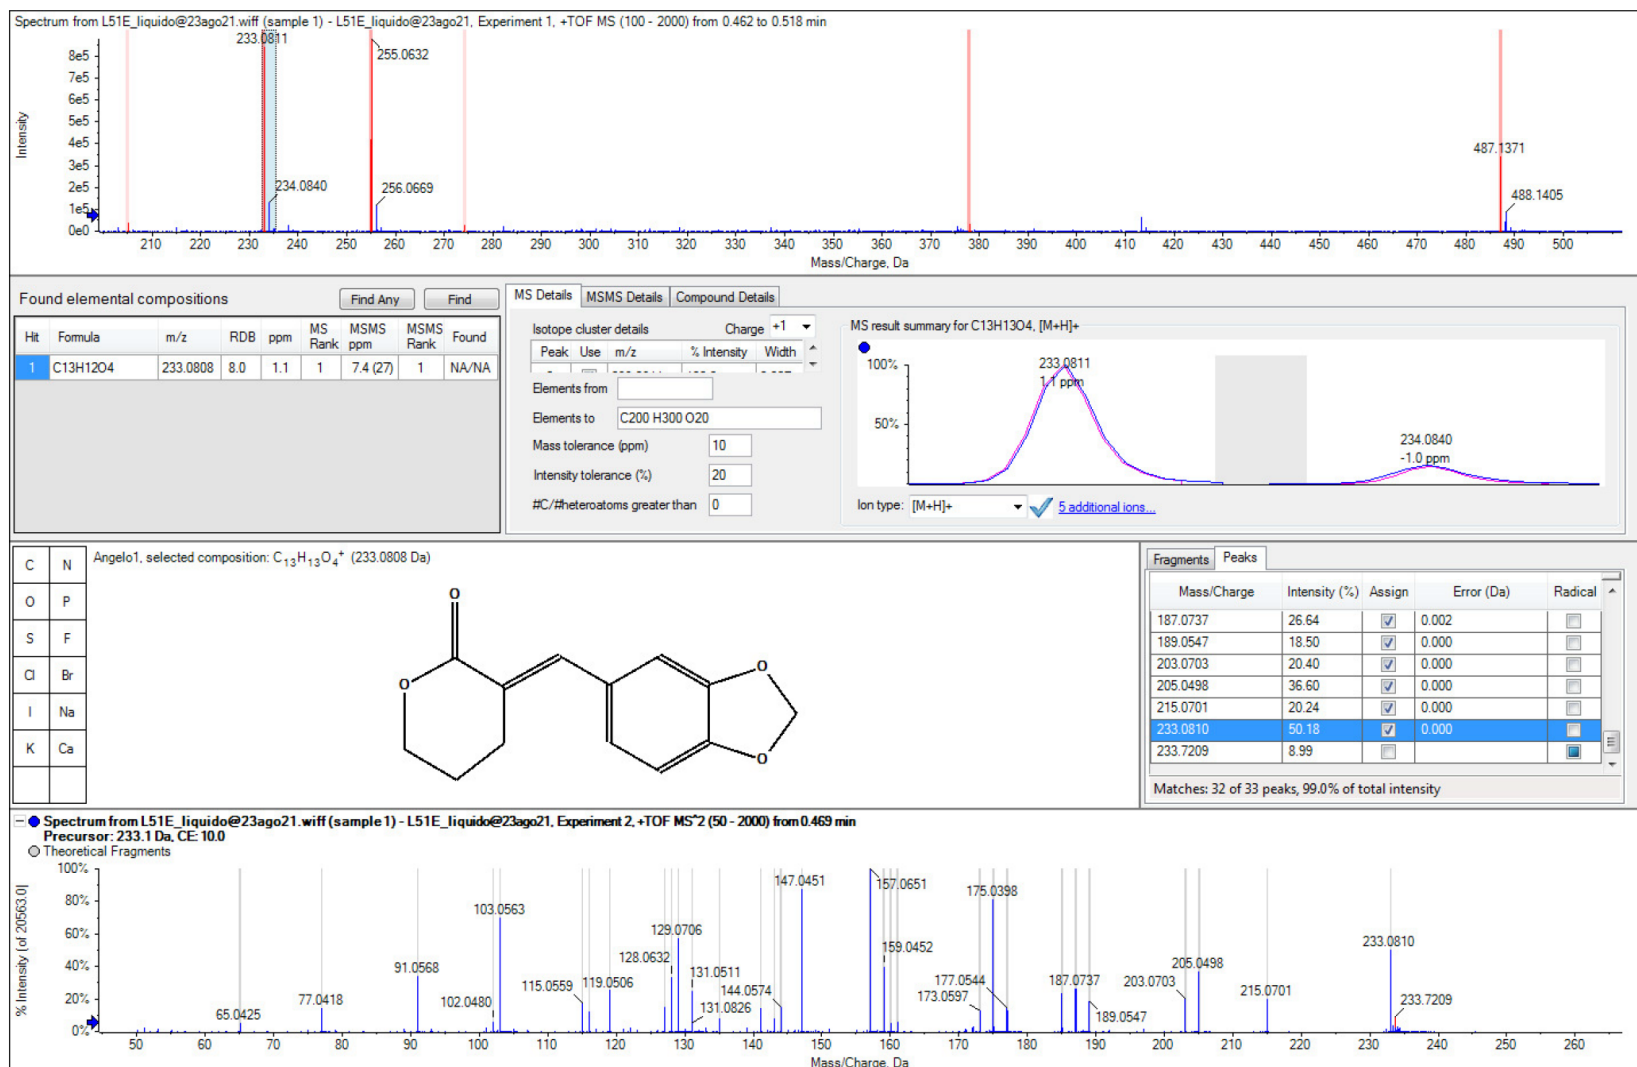



### S4.14. HRMS data of 19E.

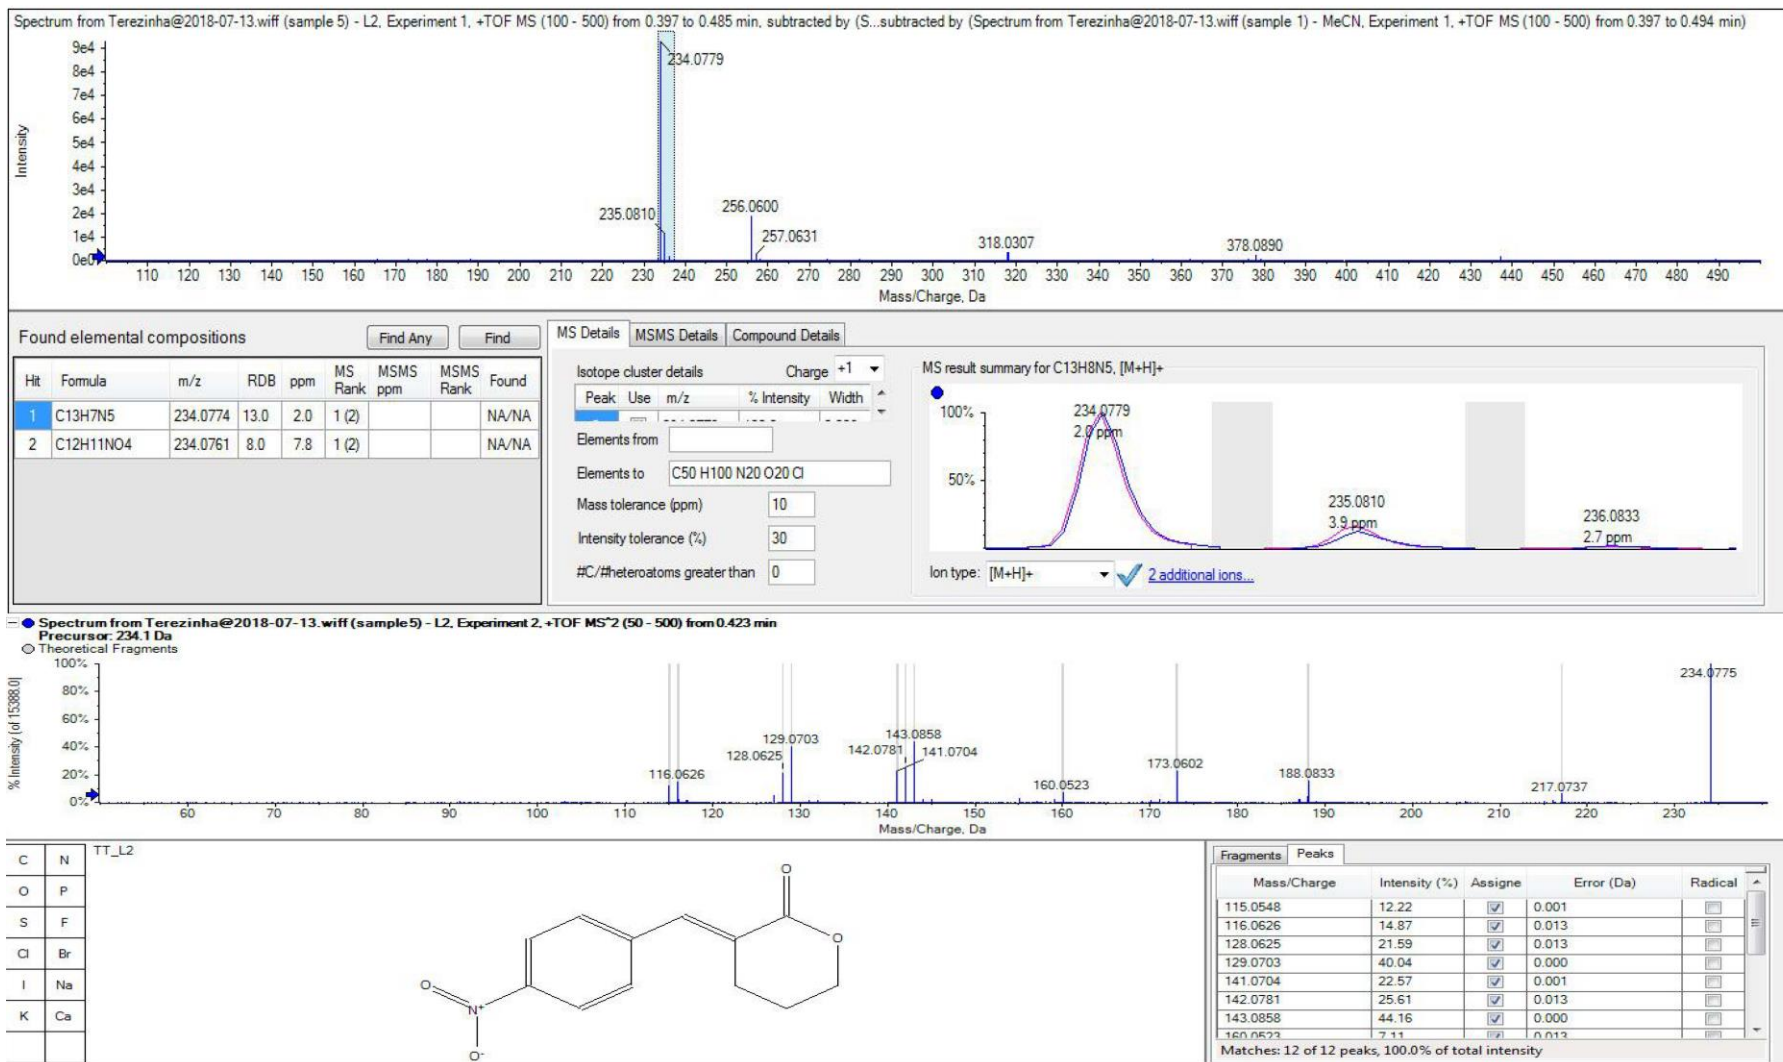

### S5.1. GC-MS data of 10E.

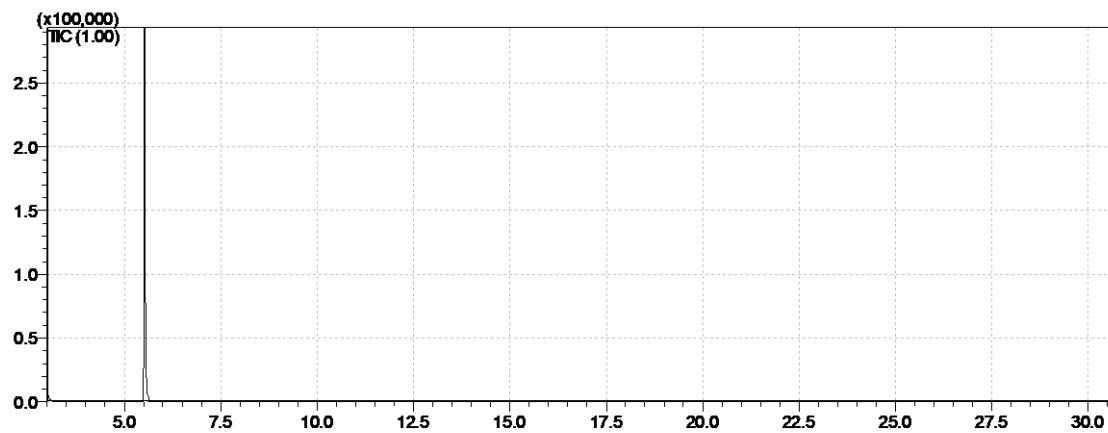

**Purity: 98.1 %**

Line#:1 R.Time:5.525(Scan#:304)  
MassPeaks:35  
RawMode:Averaged 5.492-5.625(300-316) BasePeak:67.00(13707)  
BG Mode:None Group 1 - Event 1 Scan

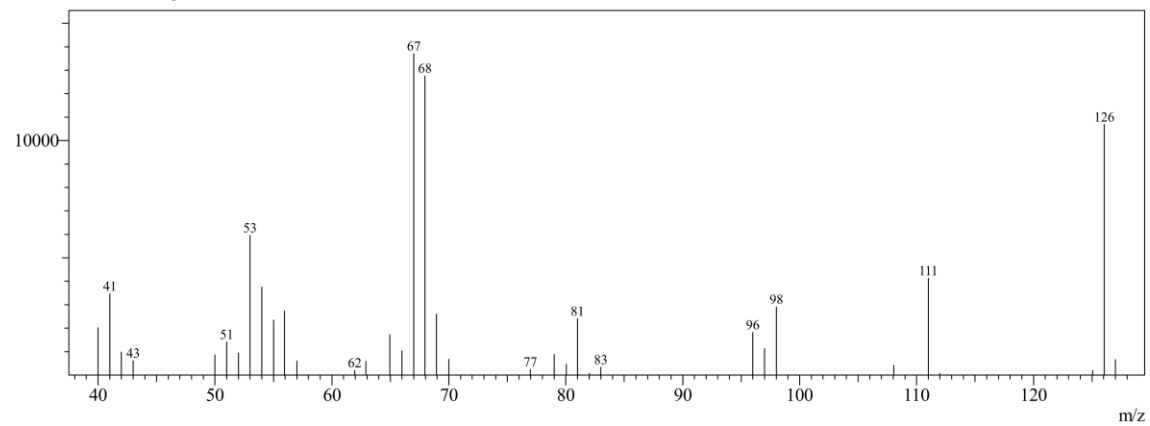



## S5.2. GC-MS data of 10Z.

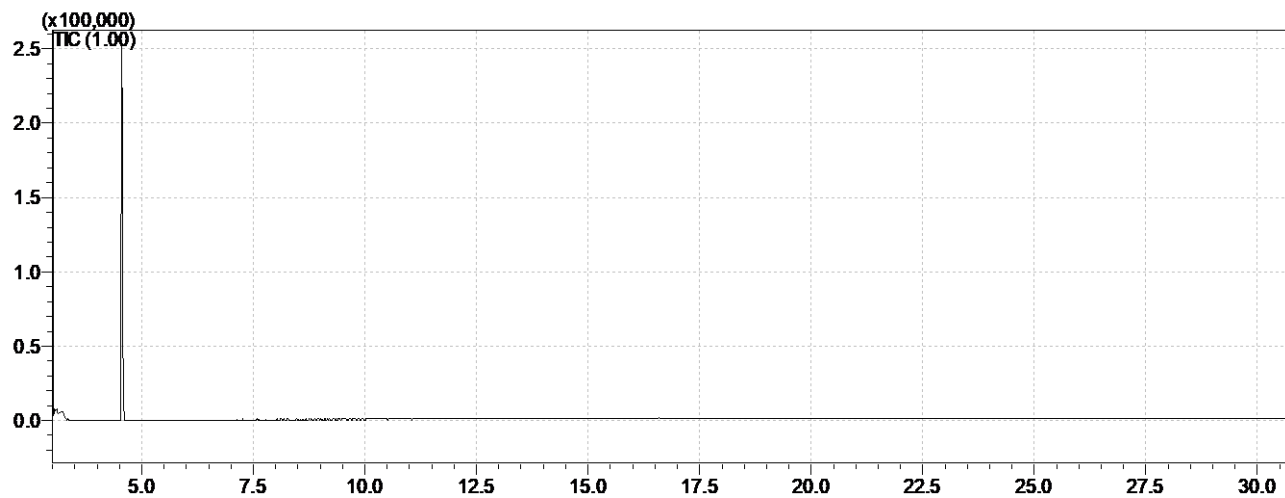

**Purity: 96.9 %**

Line#:1 R.Time:4.550(Scan#:187)  
MassPeaks:35  
RawMode:Averaged 4.517-4.608(183-194) BasePeak:53.00(8574)  
BG Mode:None Group 1 - Event 1 Scan

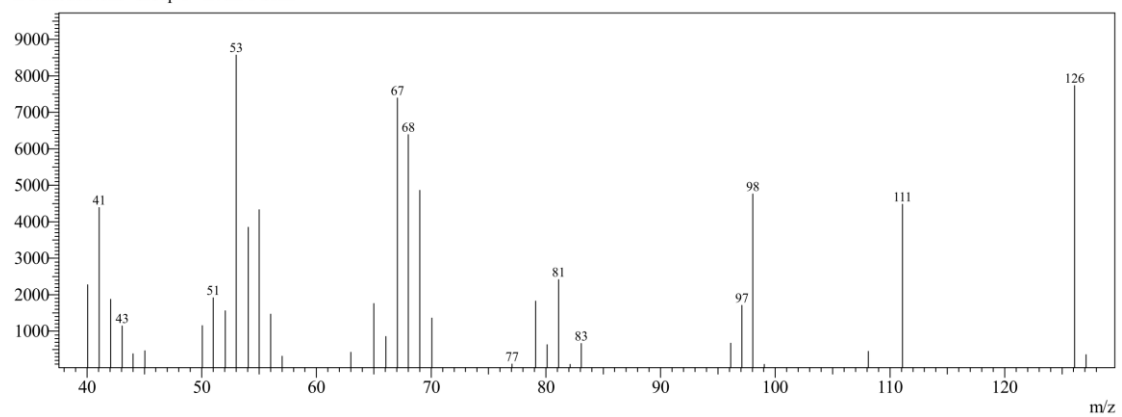

### S5.3. GC-MS data of 11E.

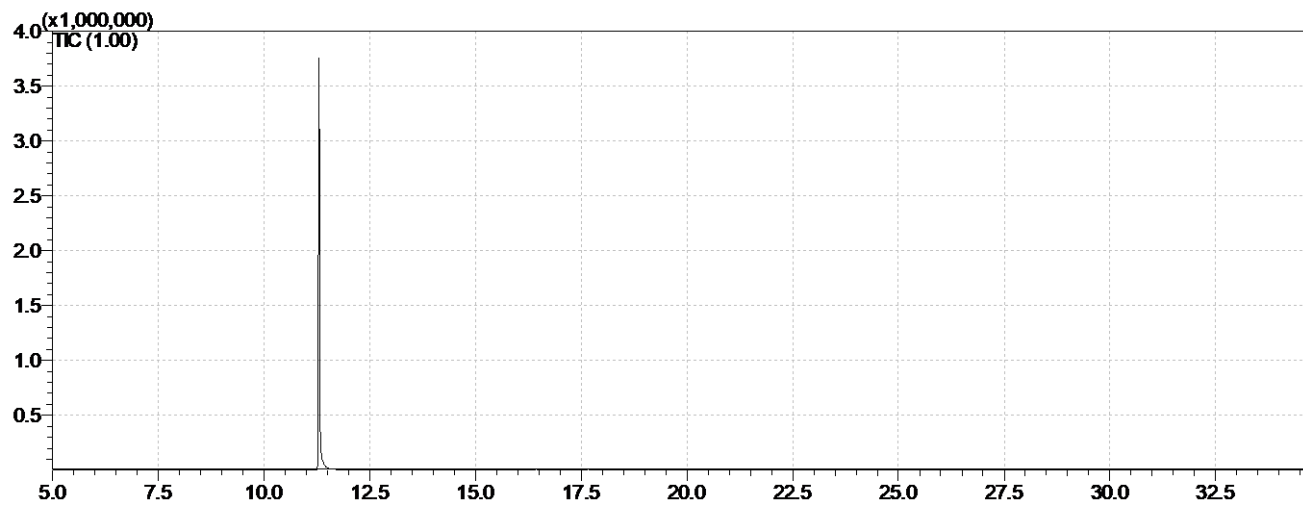

**Purity: 99.6 %**

Line#:1 R.Time:11.292(Scan#:756)  
MassPeaks:72  
RawMode:Averaged 11.258-11.433(752-773) BasePeak:67.05(113191)  
BG Mode:None Group 1 - Event 1 Scan

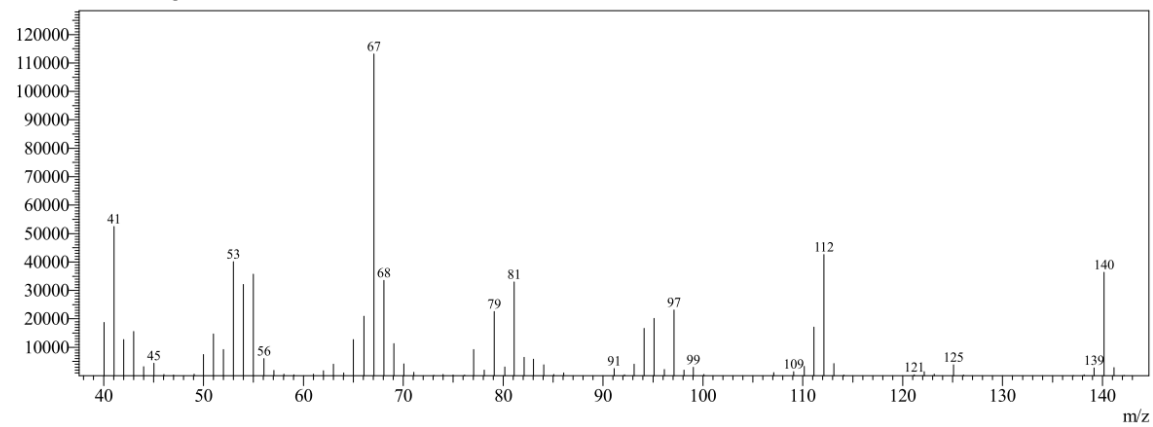

### S5.4. GC-MS data of 11Z.

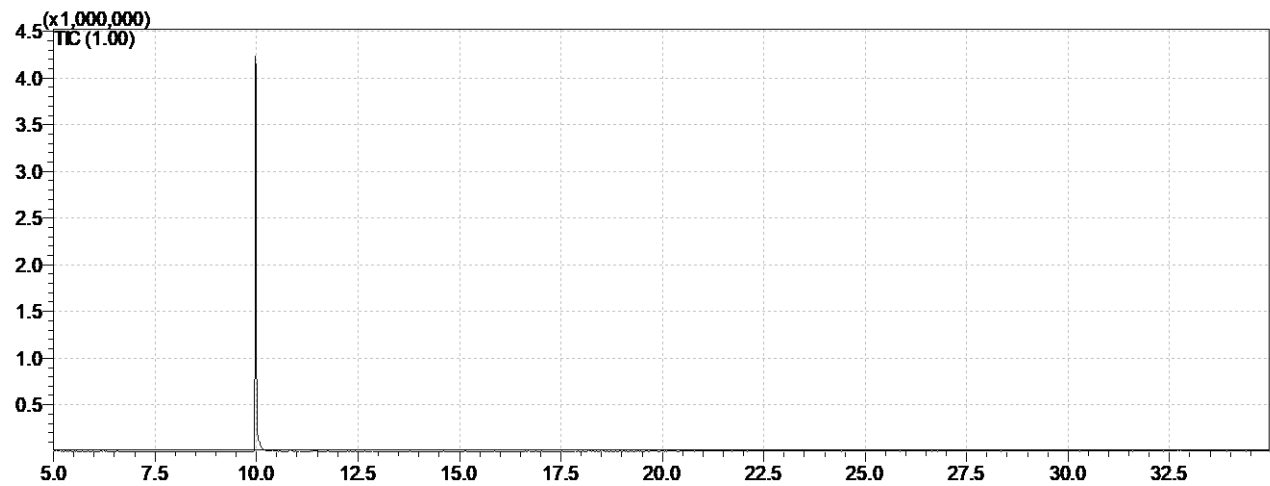

**Purity: 98.9 %**

Line#:1 R.Time:9.975(Scan#:598)  
MassPeaks:74  
RawMode:Averaged 9.942-10.083(594-611) BasePeak:67.05(145690)  
BG Mode:None Group 1 - Event 1 Scan

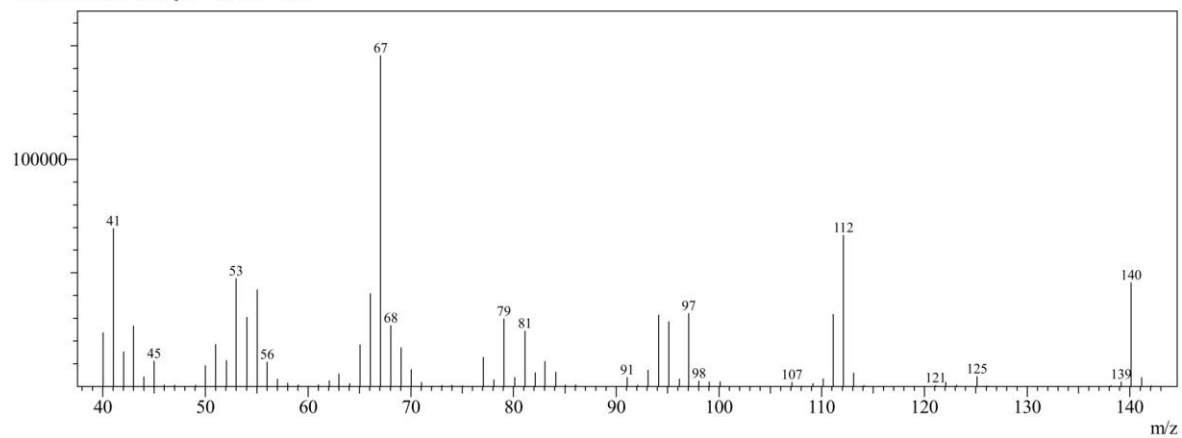

### S5.5. GC-MS data of 12E.

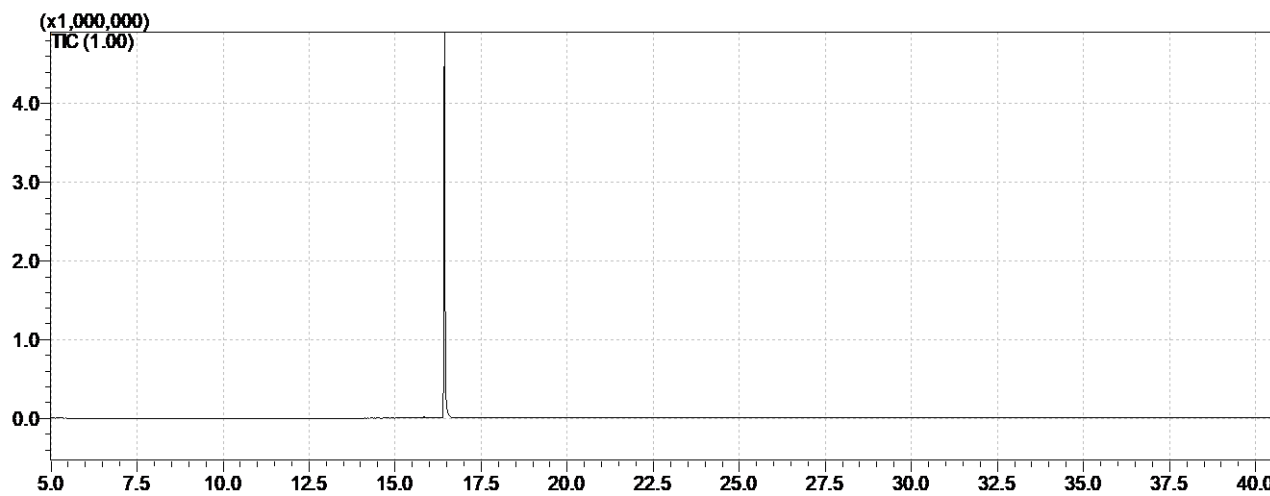

**Purity: 98.8 %**

Line#:1 R.Time:16.433(Scan#:1373)  
MassPeaks:91  
RawMode:Averaged 16.383-16.583(1367-1391) BasePeak:113.05(100004)  
BG Mode:None Group 1 - Event 1 Scan

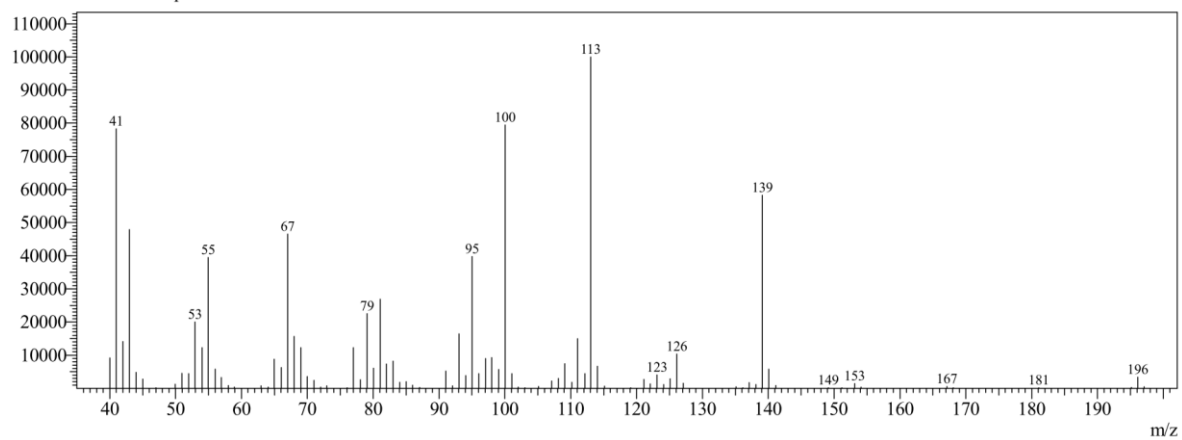

### S5.6. GC-MS data of 12Z.

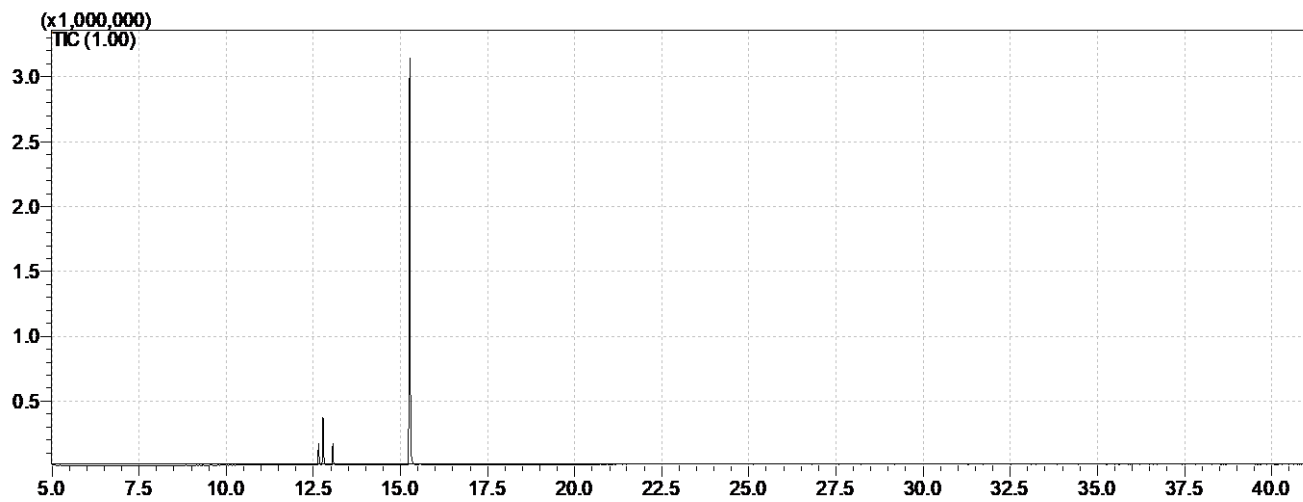

Purity: 82.3 %

Line#:1 R.Time:15.267(Scan#:1233)  
MassPeaks:84  
RawMode:Averaged 15.225-15.333(1228-1241) BasePeak:139.15(164241)  
BG Mode:None Group 1 - Event 1 Scan

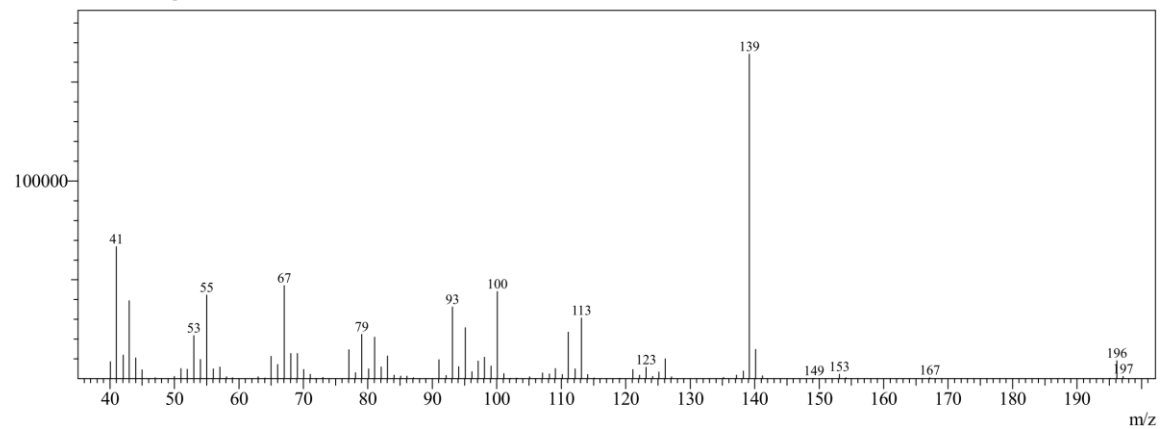

### S5.7. GC-MS data of 13E.

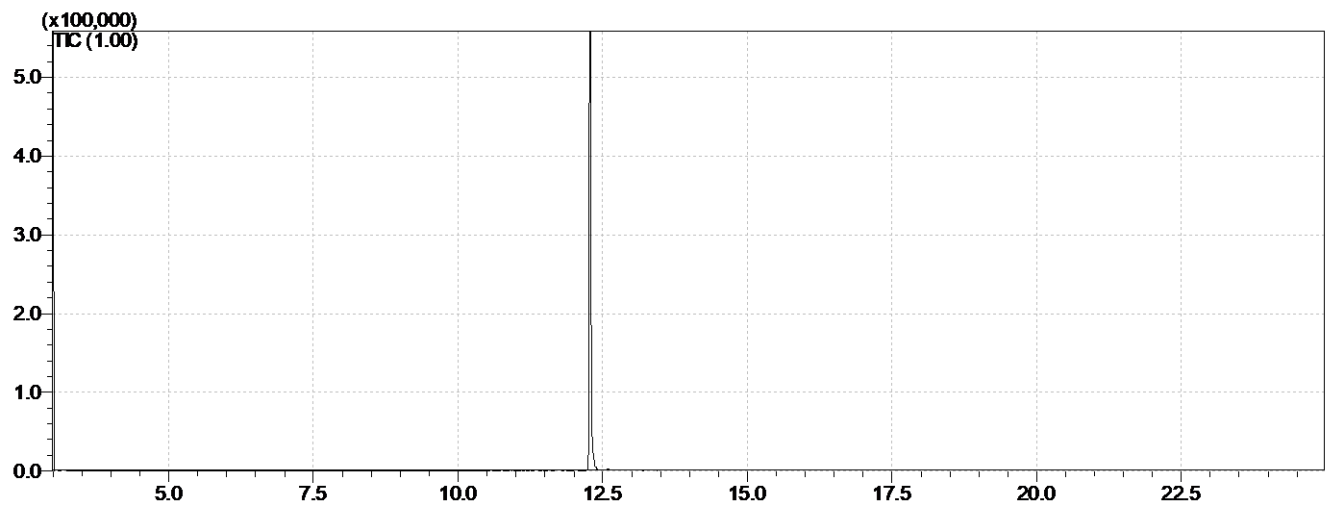

**Purity: 99.7 %**

Line#:1 R.Time:12.283(Scan#:1115)  
MassPeaks:61  
RawMode:Averaged 12.250-12.333(1111-1121) BasePeak:113.05(33980)  
BG Mode:None Group 1 - Event 1 Scan

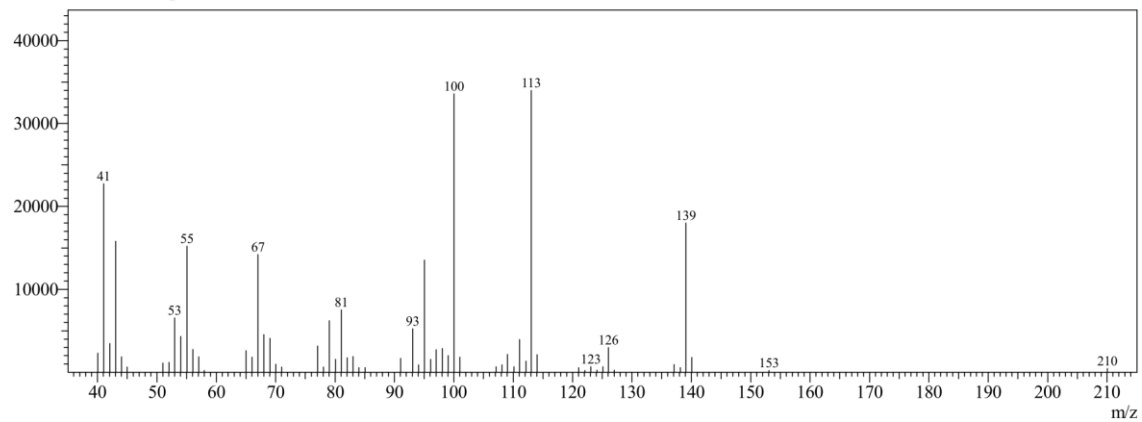

### S5.8. GC-MS data of 13Z.

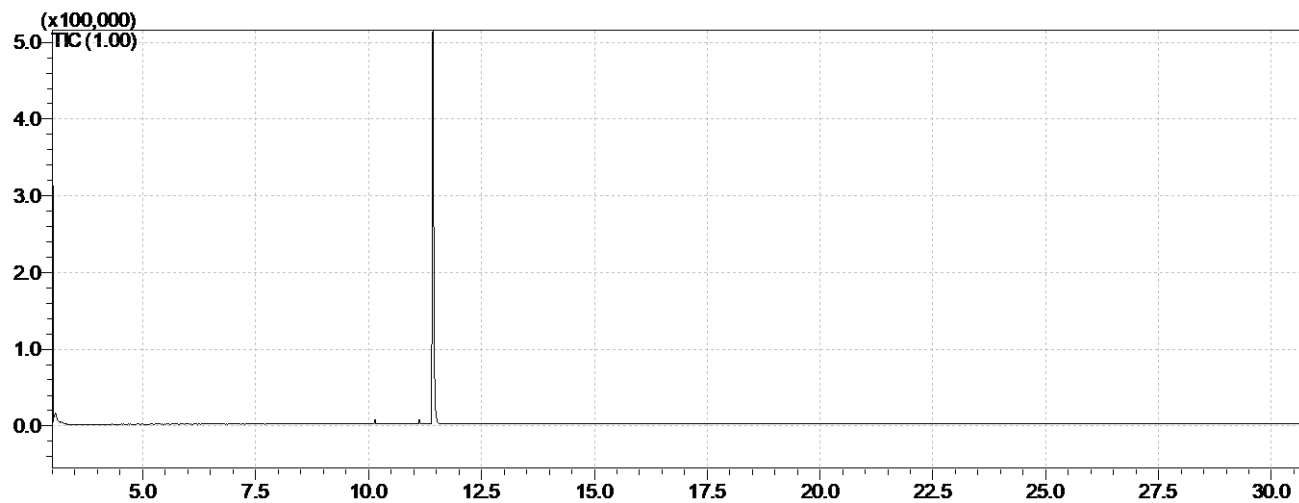

**Purity: 98.8 %**

Line#:1 R.Time:11.425(Scan#:1012)  
MassPeaks:65  
RawMode:Averaged 11.392-11.508(1008-1022) BasePeak:41.00(21255)  
BG Mode:None Group 1 - Event 1 Scan

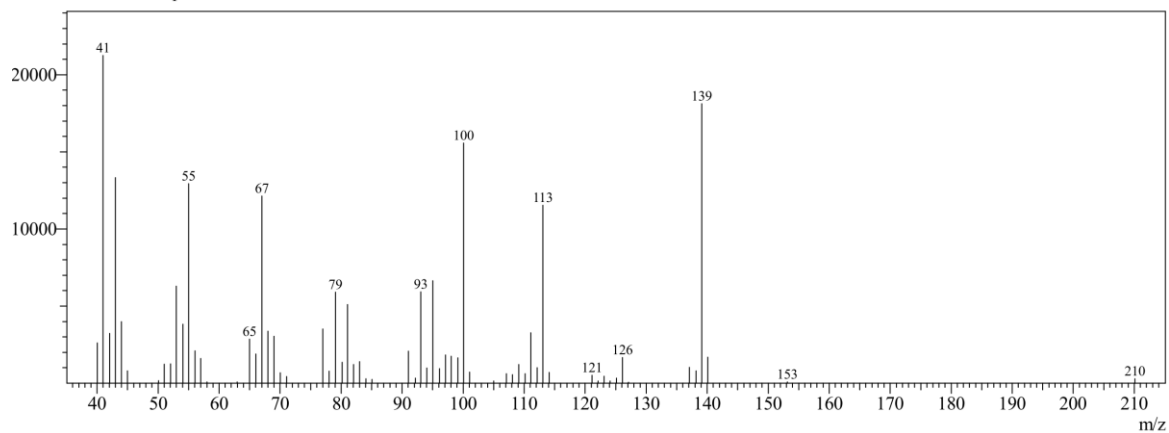

### S5.9. GC-MS data of 14E.

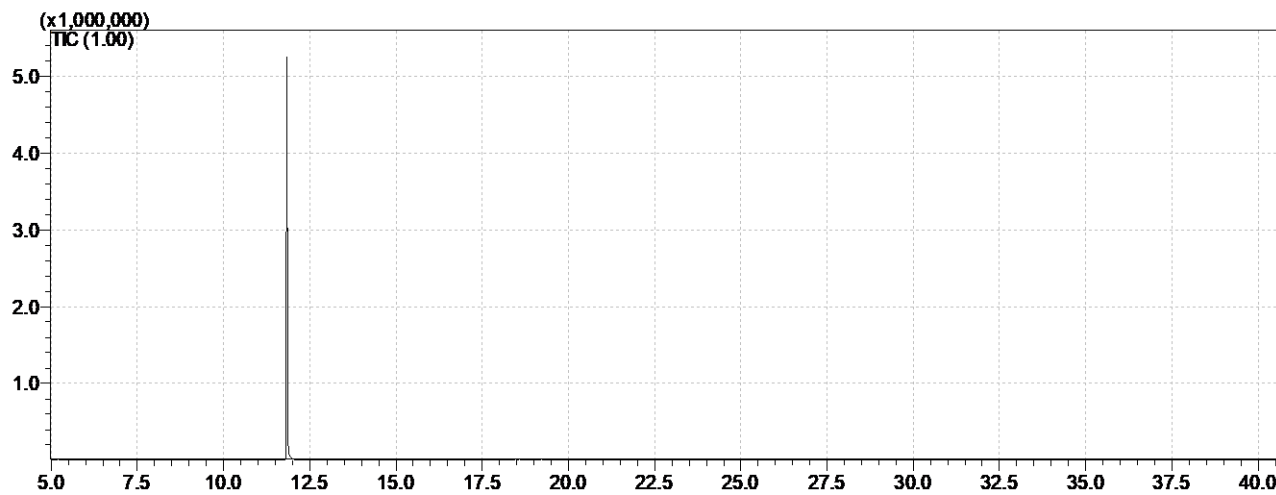

**Purity: 99.8 %**

Line#:1 R.Time:11.833(Scan#:821)  
MassPeaks:86  
RawMode:Averaged 11.792-11.908(816-830) BasePeak:81.05(122579)  
BG Mode:None Group 1 - Event 1 Scan

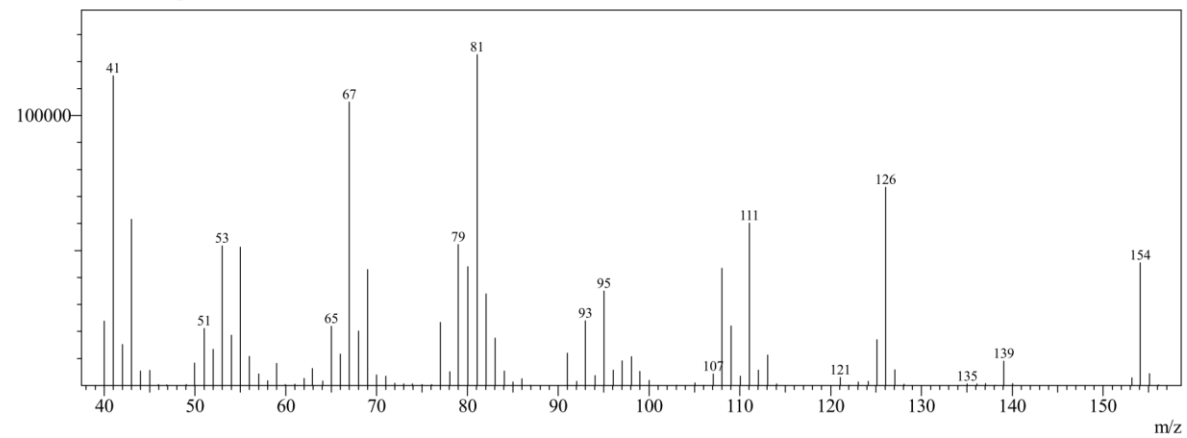



### S5.10. GC-MS data of 15E.

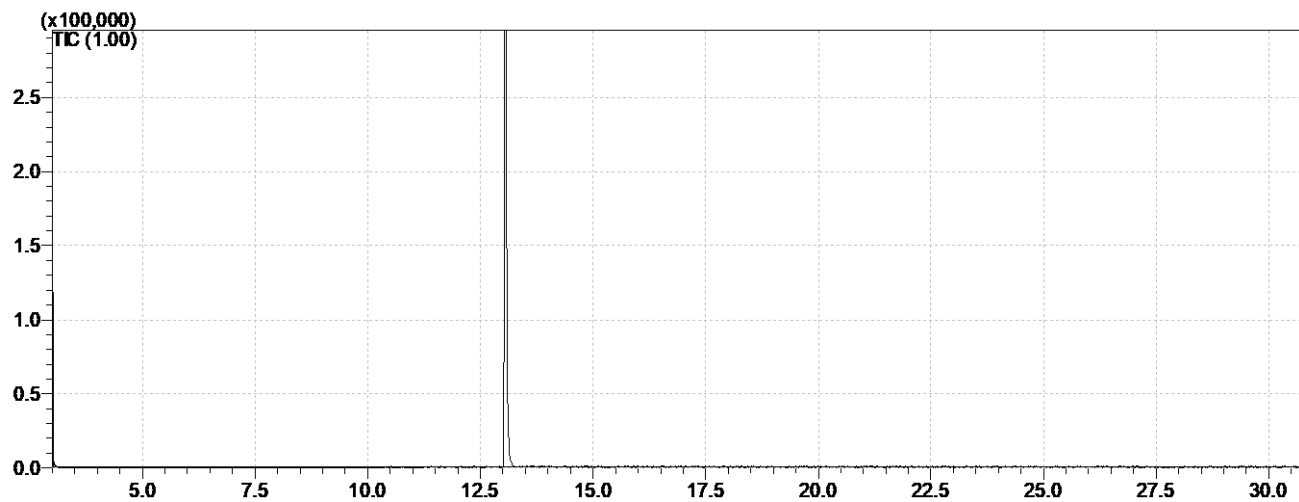

**Purity: 99.9 %**

Line#:1 R.Time:13.058(Scan#:1208)  
MassPeaks:55  
RawMode:Averaged 13.000-13.200(1201-1225) BasePeak:115.00(14962)  
BG Mode:None Group 1 - Event 1 Scan

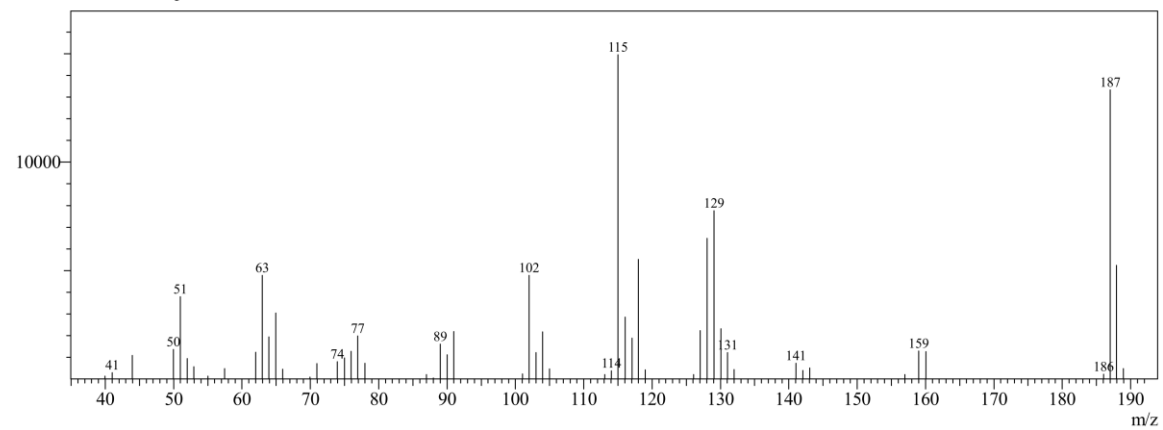

### S5.11. GC-MS data of 16E.

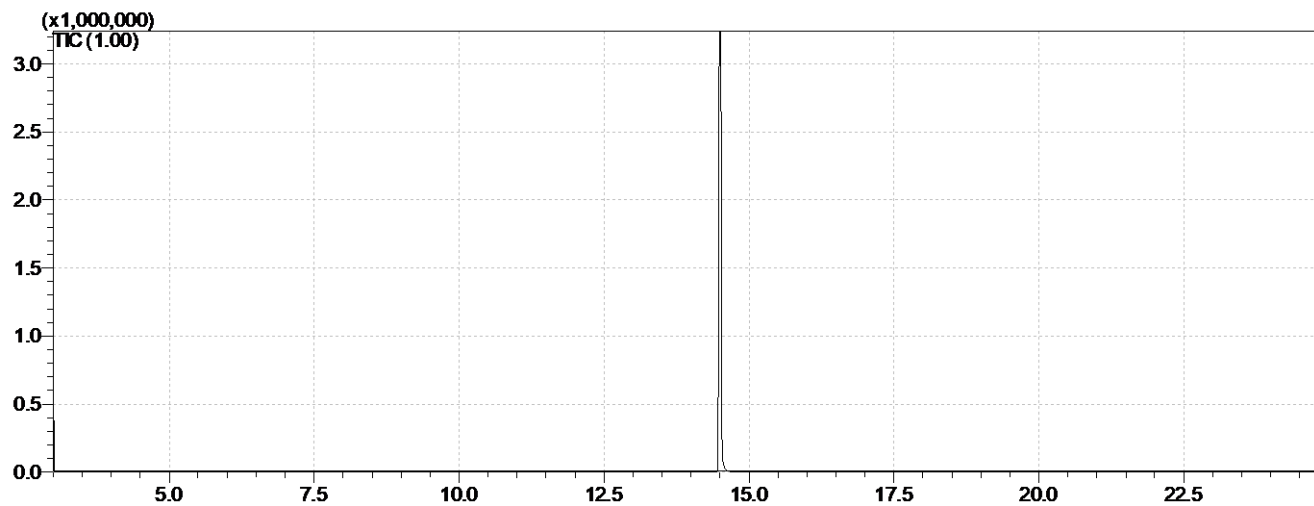

**Purity: 99.9 %**

Line#:1 R.Time:14.500(Scan#:1381)  
MassPeaks:146  
RawMode:Averaged 14.450-14.567(1375-1389) BasePeak:221.00(143438)  
BG Mode:None Group 1 - Event 1 Scan

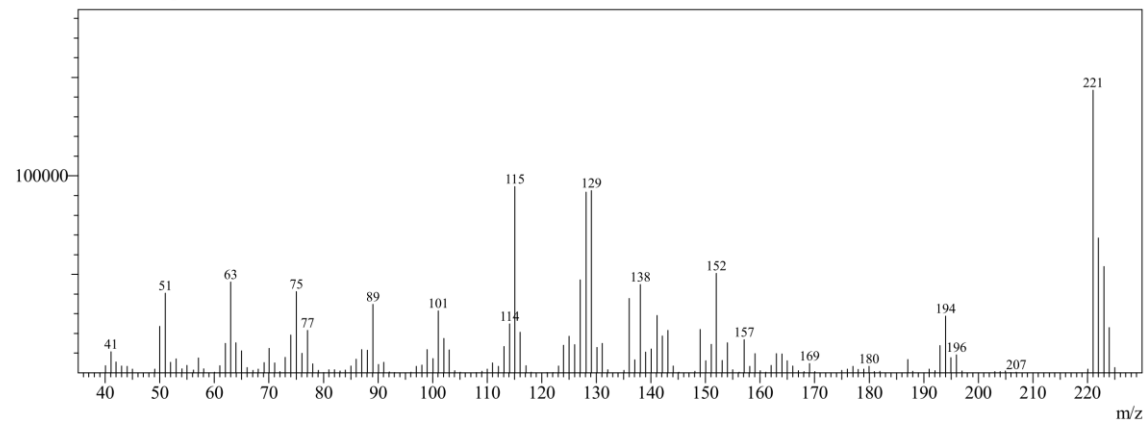

### S5.12. GC-MS data of 17E.

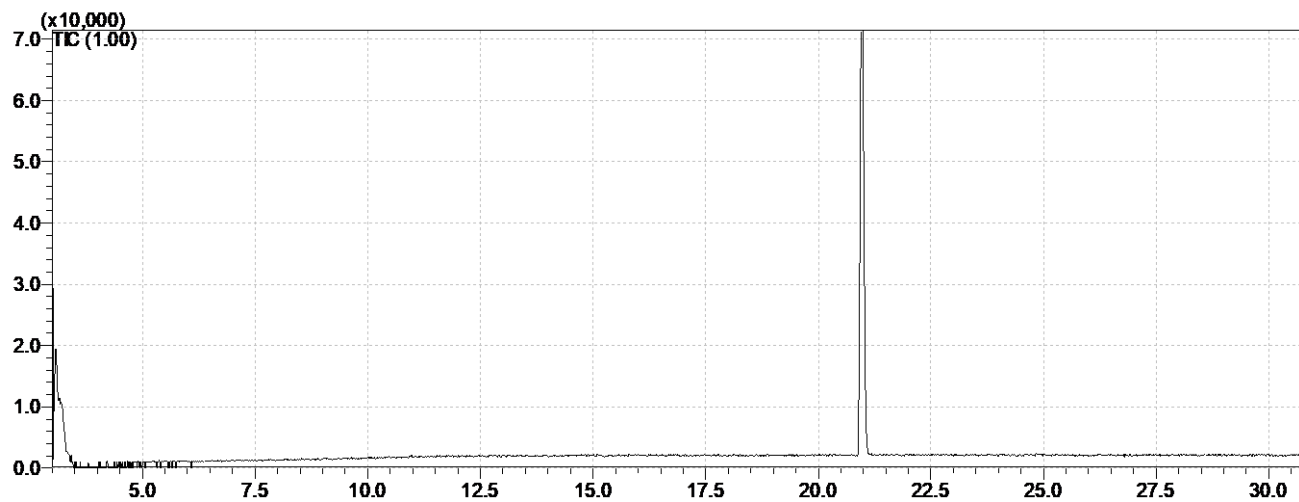

**Purity: 99.9 %**

Line#:1 R.Time:20.967(Scan#:2157)  
MassPeaks:35  
RawMode:Averaged 20.875-21.083(2146-2171) BasePeak:128.15(4074)  
BG Mode:None Group 1 - Event 1 Scan

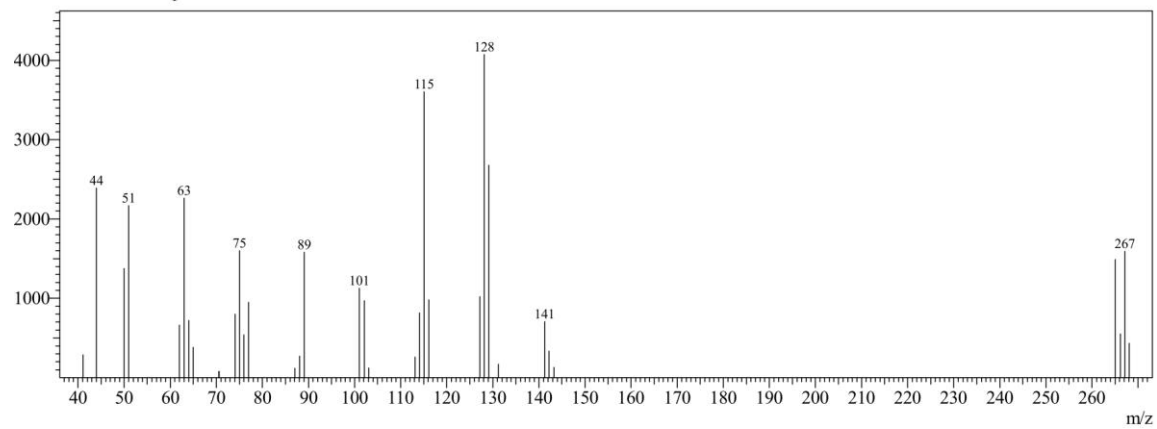

### S5.13. GC-MS data of 18E.

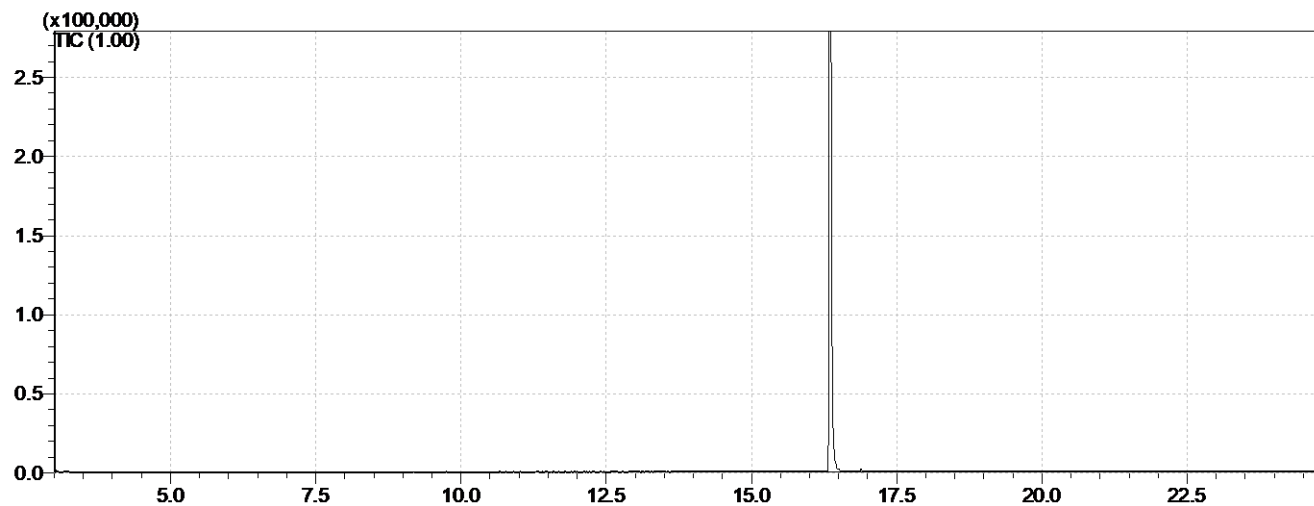

**Purity: 99.9 %**

Line#:1 R.Time:16.350(Scan#:1603)  
MassPeaks:84  
RawMode:Averaged 16.308-16.450(1598-1615) BasePeak:232.00(15131)  
BG Mode:None Group 1 - Event 1 Scan

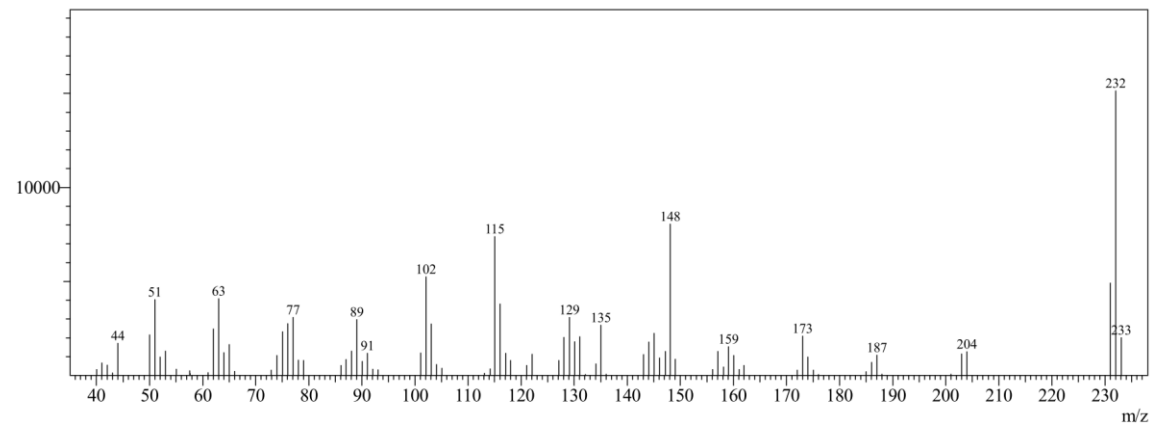

S5.14. GC-MS data of 19E.

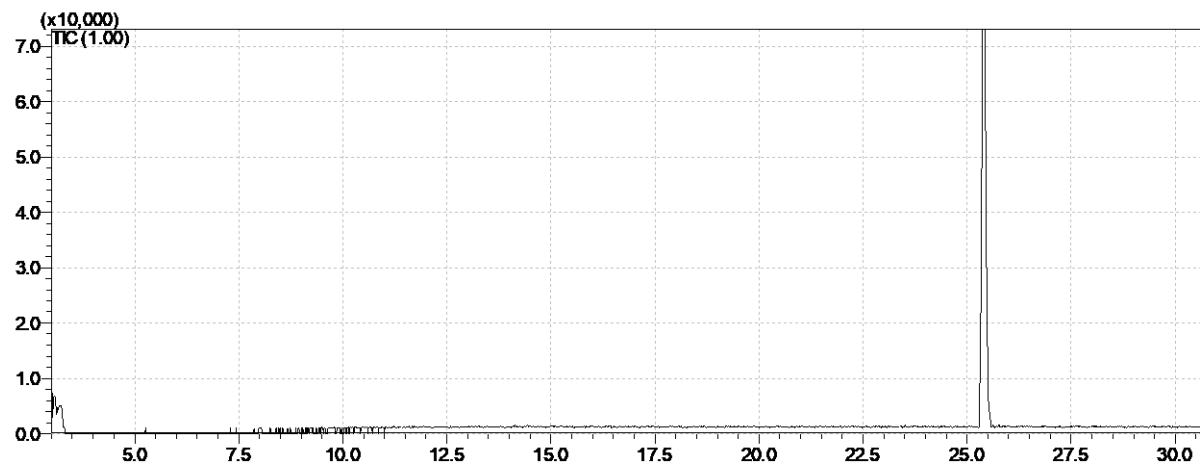

Purity: 99.9 %

Line#:1 R.Time:25.400(Scan#:2689)  
MassPeaks:36  
RawMode:Averaged 25.283-25.558(2675-2708) BasePeak:115.10(4064)  
BG Mode:None Group 1 - Event 1 Scan

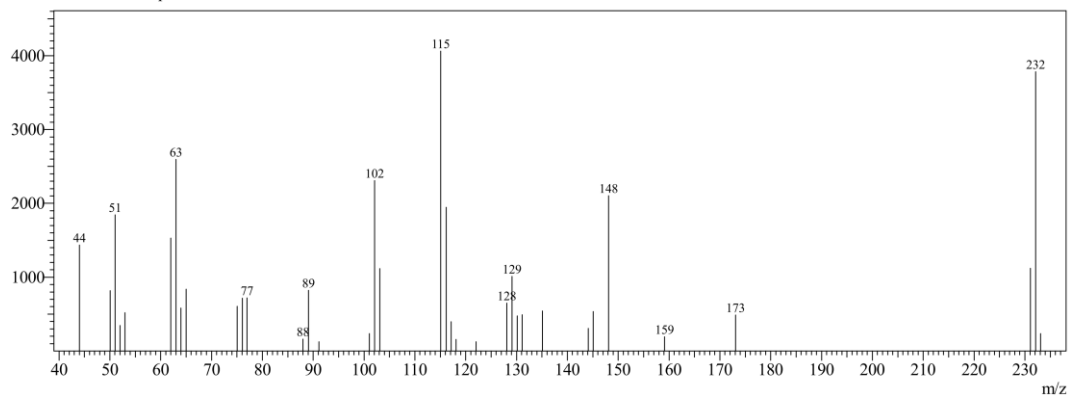

### S5.14. GC-MS data of 20.

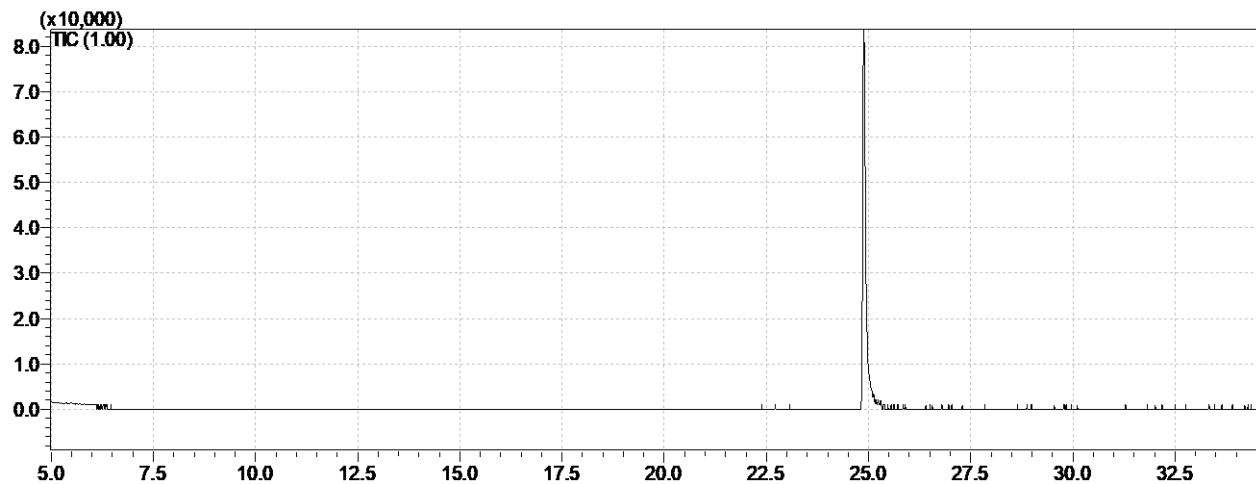

Purity: > 99.9 %

Line#:1 R.Time:24.883(Scan#:2387)  
MassPeaks:25  
RawMode:Averaged 24.692-25.417(2364-2451) BasePeak:170.10(2830)  
BG Mode:None Group 1 - Event 1 Scan

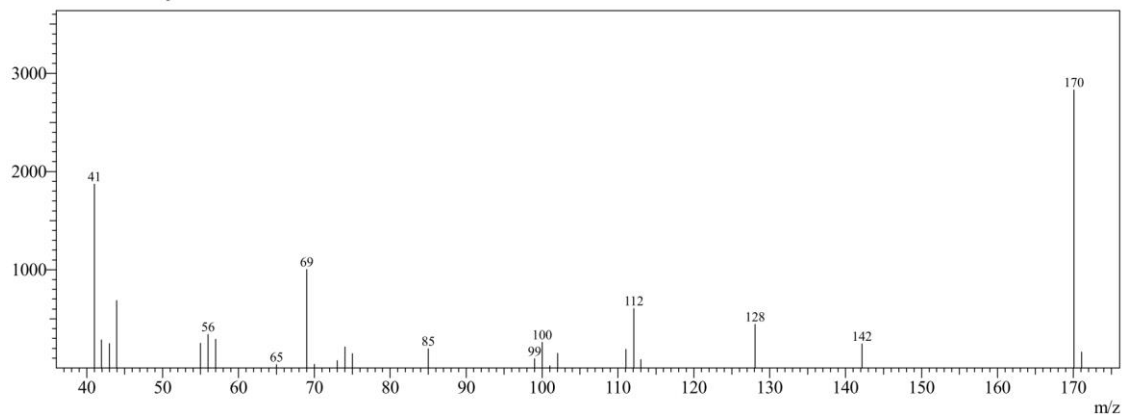

Supplement: d3ra01975f1.pdf [file d3ra01975f1.pdf]
